# Supplementary material for: Emergence of non-monotonic deep cavity cavitand assembly with increasing portal methylation
Source: Royal Society of Chemistry journal article supplement (doi:10.1039/c9me00076c), 2019-09-27
Supplement: c9me00076c4.top [file c9me00076c4.top]

[ defaults ]
; nbfunc        comb-rule       gen-pairs       fudgeLJ fudgeQQ
  1               2               yes             0.5     0.8333

[ atomtypes ]
;name   bond_type     mass     charge   ptype   sigma         epsilon       Amb
 o        o           0.00000  0.00000   A     2.95992e-01   8.78640e-01 ; 1.66  0.2100
 c        c           0.00000  0.00000   A     3.39967e-01   3.59824e-01 ; 1.91  0.0860
 oh       oh          0.00000  0.00000   A     3.06647e-01   8.80314e-01 ; 1.72  0.2104
 ho       ho          0.00000  0.00000   A     0.00000e+00   0.00000e+00 ; 0.00  0.0000
 c3       c3          0.00000  0.00000   A     3.39967e-01   4.57730e-01 ; 1.91  0.1094
 hc       hc          0.00000  0.00000   A     2.64953e-01   6.56888e-02 ; 1.49  0.0157
 ca       ca          0.00000  0.00000   A     3.39967e-01   3.59824e-01 ; 1.91  0.0860
 ha       ha          0.00000  0.00000   A     2.59964e-01   6.27600e-02 ; 1.46  0.0150
 os       os          0.00000  0.00000   A     3.00001e-01   7.11280e-01 ; 1.68  0.1700
 h2       h2          0.00000  0.00000   A     2.29317e-01   6.56888e-02 ; 1.29  0.0157

[ moleculetype ]
;name            nrexcl
 octa-acid              3

[ atoms ]
;   nr  type  resi  res  atom  cgnr     charge      mass       ; qtot   bond_type
     1    o     1   OCT   O29    1    -0.880201     16.00000 ; qtot -0.880
     2    c     1   OCT   C93    2     0.916500     12.01000 ; qtot 0.036
     3    o     1   OCT   O30    3    -0.855801     16.00000 ; qtot -0.820
     4   c3     1   OCT   C30    4    -0.189000     12.01000 ; qtot -1.009
     5   hc     1   OCT   H49    5     0.032600      1.00800 ; qtot -0.976
     6   hc     1   OCT   H50    6     0.031500      1.00800 ; qtot -0.944
     7   c3     1   OCT   C29    7    -0.062500     12.01000 ; qtot -1.007
     8   hc     1   OCT   H13    8     0.069100      1.00800 ; qtot -0.938
     9   hc     1   OCT   H14    9     0.041700      1.00800 ; qtot -0.896
    10   c3     1   OCT    C8   10     0.014100     12.01000 ; qtot -0.882
    11   hc     1   OCT    H4   11     0.093800      1.00800 ; qtot -0.788
    12   ca     1   OCT    C5   12    -0.056500     12.01000 ; qtot -0.845
    13   ca     1   OCT    C2   13    -0.099900     12.01000 ; qtot -0.945
    14   ha     1   OCT    H2   14     0.156100      1.00800 ; qtot -0.789
    15   ca     1   OCT    C6   15    -0.083000     12.01000 ; qtot -0.872
    16   c3     1   OCT    C7   16     0.026700     12.01000 ; qtot -0.845
    17   hc     1   OCT    H3   17     0.086300      1.00800 ; qtot -0.759
    18   ca     1   OCT    C9   18    -0.093200     12.01000 ; qtot -0.852
    19   ca     1   OCT   C12   19    -0.095400     12.01000 ; qtot -0.947
    20   ha     1   OCT    H5   20     0.172900      1.00800 ; qtot -0.774
    21   c3     1   OCT   C31   21    -0.069700     12.01000 ; qtot -0.844
    22   hc     1   OCT   H15   22     0.054000      1.00800 ; qtot -0.790
    23   c3     1   OCT   C32   23    -0.134300     12.01000 ; qtot -0.924
    24   hc     1   OCT   H55   24     0.057900      1.00800 ; qtot -0.866
    25   hc     1   OCT   H56   25     0.084400      1.00800 ; qtot -0.782
    26    c     1   OCT   C96   26     0.639801     12.01000 ; qtot -0.142
    27    o     1   OCT   O31   27    -0.596801     16.00000 ; qtot -0.739
    28   oh     1   OCT   O32   28    -0.614601     16.00000 ; qtot -1.354
    29   ho     1   OCT   H58   29     0.514101      1.00800 ; qtot -0.839
    30   hc     1   OCT   H16   30     0.072800      1.00800 ; qtot -0.767
    31   ca     1   OCT    C3   31     0.079100     12.01000 ; qtot -0.688
    32   os     1   OCT    O4   32    -0.334900     16.00000 ; qtot -1.022
    33   ca     1   OCT    C1   33    -0.153800     12.01000 ; qtot -1.176
    34   ha     1   OCT    H1   34     0.157800      1.00800 ; qtot -1.018
    35   ca     1   OCT    C4   35     0.079300     12.01000 ; qtot -0.939
    36   os     1   OCT    O7   36    -0.336500     16.00000 ; qtot -1.276
    37   c3     1   OCT   C39   37     0.370000     12.01000 ; qtot -0.906
    38   h2     1   OCT   H23   38     0.067900      1.00800 ; qtot -0.838
    39   ca     1   OCT   C41   39    -0.046400     12.01000 ; qtot -0.884
    40   ca     1   OCT   C43   40    -0.176400     12.01000 ; qtot -1.061
    41   ha     1   OCT   H25   41     0.159400      1.00800 ; qtot -0.901
    42   ca     1   OCT   C44   42    -0.165000     12.01000 ; qtot -1.066
    43   ha     1   OCT   H26   43     0.164800      1.00800 ; qtot -0.901
    44   os     1   OCT    O8   44    -0.330000     16.00000 ; qtot -1.231
    45   ca     1   OCT   C18   45     0.084400     12.01000 ; qtot -1.147
    46   ca     1   OCT   C19   46    -0.155800     12.01000 ; qtot -1.303
    47   ha     1   OCT    H8   47     0.157700      1.00800 ; qtot -1.145
    48   ca     1   OCT   C15   48    -0.072000     12.01000 ; qtot -1.217
    49   ca     1   OCT   C17   49    -0.095600     12.01000 ; qtot -1.313
    50   ha     1   OCT    H7   50     0.172900      1.00800 ; qtot -1.140
    51   ca     1   OCT   C20   51    -0.093300     12.01000 ; qtot -1.233
    52   c3     1   OCT   C21   52     0.026800     12.01000 ; qtot -1.206
    53   hc     1   OCT    H9   53     0.086300      1.00800 ; qtot -1.120
    54   c3     1   OCT   C35   54    -0.069800     12.01000 ; qtot -1.190
    55   hc     1   OCT   H19   55     0.054000      1.00800 ; qtot -1.136
    56   c3     1   OCT   C36   56    -0.134300     12.01000 ; qtot -1.270
    57   hc     1   OCT   H51   57     0.057900      1.00800 ; qtot -1.212
    58   hc     1   OCT   H52   58     0.084500      1.00800 ; qtot -1.128
    59    c     1   OCT   C94   59     0.639801     12.01000 ; qtot -0.488
    60    o     1   OCT   O27   60    -0.596701     16.00000 ; qtot -1.085
    61   oh     1   OCT   O28   61    -0.614601     16.00000 ; qtot -1.699
    62   ho     1   OCT   H57   62     0.514001      1.00800 ; qtot -1.185
    63   hc     1   OCT   H20   63     0.072800      1.00800 ; qtot -1.112
    64   ca     1   OCT   C16   64     0.078000     12.01000 ; qtot -1.034
    65   os     1   OCT    O2   65    -0.343400     16.00000 ; qtot -1.378
    66   c3     1   OCT   C40   66     0.370500     12.01000 ; qtot -1.007
    67   h2     1   OCT   H24   67     0.071100      1.00800 ; qtot -0.936
    68   ca     1   OCT   C47   68    -0.046200     12.01000 ; qtot -0.982
    69   ca     1   OCT   C49   69    -0.169800     12.01000 ; qtot -1.152
    70   ha     1   OCT   H28   70     0.163900      1.00800 ; qtot -0.988
    71   ca     1   OCT   C50   71    -0.179600     12.01000 ; qtot -1.168
    72   ha     1   OCT   H29   72     0.159700      1.00800 ; qtot -1.008
    73   os     1   OCT    O1   73    -0.334800     16.00000 ; qtot -1.343
    74   ca     1   OCT   C24   74     0.079200     12.01000 ; qtot -1.264
    75   ca     1   OCT   C28   75    -0.153900     12.01000 ; qtot -1.418
    76   ca     1   OCT   C25   76     0.079300     12.01000 ; qtot -1.338
    77   os     1   OCT    O3   77    -0.336600     16.00000 ; qtot -1.675
    78   c3     1   OCT   C38   78     0.370000     12.01000 ; qtot -1.305
    79   os     1   OCT    O6   79    -0.329900     16.00000 ; qtot -1.635
    80   h2     1   OCT   H22   80     0.068000      1.00800 ; qtot -1.567
    81   ca     1   OCT   C53   81    -0.046900     12.01000 ; qtot -1.614
    82   ca     1   OCT   C55   82    -0.164100     12.01000 ; qtot -1.778
    83   ha     1   OCT   H31   83     0.164900      1.00800 ; qtot -1.613
    84   ca     1   OCT   C56   84    -0.175800     12.01000 ; qtot -1.789
    85   ha     1   OCT   H32   85     0.159300      1.00800 ; qtot -1.629
    86   ha     1   OCT   H12   86     0.157800      1.00800 ; qtot -1.472
    87   ca     1   OCT   C27   87    -0.082900     12.01000 ; qtot -1.555
    88   ca     1   OCT   C26   88    -0.099900     12.01000 ; qtot -1.654
    89   ha     1   OCT   H11   89     0.156100      1.00800 ; qtot -1.498
    90   ca     1   OCT   C23   90    -0.056600     12.01000 ; qtot -1.555
    91   c3     1   OCT   C22   91     0.014200     12.01000 ; qtot -1.541
    92   hc     1   OCT   H10   92     0.093700      1.00800 ; qtot -1.447
    93   c3     1   OCT   C33   93    -0.062600     12.01000 ; qtot -1.510
    94   hc     1   OCT   H17   94     0.069100      1.00800 ; qtot -1.441
    95   c3     1   OCT   C34   95    -0.189000     12.01000 ; qtot -1.630
    96   hc     1   OCT   H53   96     0.032600      1.00800 ; qtot -1.597
    97   hc     1   OCT   H54   97     0.031500      1.00800 ; qtot -1.565
    98    c     1   OCT   C95   98     0.916500     12.01000 ; qtot -0.649
    99    o     1   OCT   O25   99    -0.880301     16.00000 ; qtot -1.529
   100    o     1   OCT   O26  100    -0.855801     16.00000 ; qtot -2.385
   101   hc     1   OCT   H18  101     0.041800      1.00800 ; qtot -2.343
   102   ca     1   OCT   C13  102    -0.072000     12.01000 ; qtot -2.415
   103   ca     1   OCT   C10  103     0.084300     12.01000 ; qtot -2.331
   104   ca     1   OCT   C14  104    -0.155800     12.01000 ; qtot -2.487
   105   ha     1   OCT    H6  105     0.157600      1.00800 ; qtot -2.329
   106   ca     1   OCT   C11  106     0.078000     12.01000 ; qtot -2.251
   107   os     1   OCT    O5  107    -0.343400     16.00000 ; qtot -2.595
   108   c3     1   OCT   C37  108     0.370500     12.01000 ; qtot -2.224
   109   h2     1   OCT   H21  109     0.071200      1.00800 ; qtot -2.153
   110   ca     1   OCT   C59  110    -0.046000     12.01000 ; qtot -2.199
   111   ca     1   OCT   C62  111    -0.170100     12.01000 ; qtot -2.369
   112   ha     1   OCT   H35  112     0.163900      1.00800 ; qtot -2.205
   113   ca     1   OCT   C61  113    -0.179900     12.01000 ; qtot -2.385
   114   ha     1   OCT   H34  114     0.159900      1.00800 ; qtot -2.225
   115   ca     1   OCT   C64  115     0.145600     12.01000 ; qtot -2.079
   116   ca     1   OCT   C60  116    -0.174300     12.01000 ; qtot -2.254
   117   ha     1   OCT   H36  117     0.154300      1.00800 ; qtot -2.099
   118   ca     1   OCT   C63  118     0.127300     12.01000 ; qtot -1.972
   119   os     1   OCT   O15  119    -0.263400     16.00000 ; qtot -2.236
   120   ca     1   OCT   C77  120     0.083200     12.01000 ; qtot -2.152
   121   ca     1   OCT   C74  121    -0.191200     12.01000 ; qtot -2.344
   122   ha     1   OCT   H45  122     0.146200      1.00800 ; qtot -2.197
   123   ca     1   OCT   C73  123    -0.115500     12.01000 ; qtot -2.313
   124   ha     1   OCT   H40  124     0.165300      1.00800 ; qtot -2.148
   125   ca     1   OCT   C76  125    -0.108500     12.01000 ; qtot -2.256
   126    c     1   OCT   C78  126     0.910501     12.01000 ; qtot -1.346
   127    o     1   OCT   O19  127    -0.841001     16.00000 ; qtot -2.187
   128    o     1   OCT   O20  128    -0.836001     16.00000 ; qtot -3.023
   129   ca     1   OCT   C75  129    -0.115300     12.01000 ; qtot -3.138
   130   ha     1   OCT   H39  130     0.165800      1.00800 ; qtot -2.972
   131   ca     1   OCT   C72  131     0.070200     12.01000 ; qtot -2.902
   132   os     1   OCT   O14  132    -0.265300     16.00000 ; qtot -3.167
   133   ca     1   OCT   C57  133     0.142100     12.01000 ; qtot -3.025
   134   ca     1   OCT   C54  134    -0.169800     12.01000 ; qtot -3.195
   135   ha     1   OCT   H33  135     0.154000      1.00800 ; qtot -3.041
   136   ca     1   OCT   C58  136     0.122700     12.01000 ; qtot -2.918
   137   os     1   OCT   O13  137    -0.262800     16.00000 ; qtot -3.181
   138   ca     1   OCT   C70  138     0.084700     12.01000 ; qtot -3.096
   139   ca     1   OCT   C67  139    -0.193200     12.01000 ; qtot -3.289
   140   ha     1   OCT   H48  140     0.146500      1.00800 ; qtot -3.143
   141   ca     1   OCT   C66  141    -0.114800     12.01000 ; qtot -3.258
   142   ha     1   OCT   H38  142     0.165900      1.00800 ; qtot -3.092
   143   ca     1   OCT   C69  143    -0.108800     12.01000 ; qtot -3.201
   144    c     1   OCT   C71  144     0.910401     12.01000 ; qtot -2.290
   145    o     1   OCT   O21  145    -0.839801     16.00000 ; qtot -3.130
   146    o     1   OCT   O22  146    -0.837901     16.00000 ; qtot -3.968
   147   ca     1   OCT   C68  147    -0.115900     12.01000 ; qtot -4.084
   148   ha     1   OCT   H37  148     0.165100      1.00800 ; qtot -3.919
   149   ca     1   OCT   C65  149     0.069700     12.01000 ; qtot -3.849
   150   os     1   OCT   O11  150    -0.264100     16.00000 ; qtot -4.113
   151   ca     1   OCT   C51  151     0.145500     12.01000 ; qtot -3.968
   152   ca     1   OCT   C48  152    -0.174100     12.01000 ; qtot -4.142
   153   ha     1   OCT   H30  153     0.154400      1.00800 ; qtot -3.987
   154   ca     1   OCT   C52  154     0.127200     12.01000 ; qtot -3.860
   155   os     1   OCT   O10  155    -0.263500     16.00000 ; qtot -4.124
   156   ca     1   OCT   C91  156     0.083100     12.01000 ; qtot -4.041
   157   ca     1   OCT   C88  157    -0.191100     12.01000 ; qtot -4.232
   158   ha     1   OCT   H47  158     0.146200      1.00800 ; qtot -4.085
   159   ca     1   OCT   C87  159    -0.115300     12.01000 ; qtot -4.201
   160   ha     1   OCT   H44  160     0.165300      1.00800 ; qtot -4.035
   161   ca     1   OCT   C90  161    -0.108600     12.01000 ; qtot -4.144
   162    c     1   OCT   C92  162     0.910501     12.01000 ; qtot -3.234
   163    o     1   OCT   O23  163    -0.836101     16.00000 ; qtot -4.070
   164    o     1   OCT   O24  164    -0.841001     16.00000 ; qtot -4.911
   165   ca     1   OCT   C89  165    -0.115200     12.01000 ; qtot -5.026
   166   ha     1   OCT   H43  166     0.165800      1.00800 ; qtot -4.860
   167   ca     1   OCT   C86  167     0.070200     12.01000 ; qtot -4.790
   168   os     1   OCT   O16  168    -0.265300     16.00000 ; qtot -5.055
   169   ca     1   OCT   C46  169     0.142500     12.01000 ; qtot -4.913
   170   ca     1   OCT   C42  170    -0.170500     12.01000 ; qtot -5.083
   171   ha     1   OCT   H27  171     0.154000      1.00800 ; qtot -4.929
   172   ca     1   OCT   C45  172     0.123400     12.01000 ; qtot -4.806
   173   os     1   OCT    O9  173    -0.262800     16.00000 ; qtot -5.069
   174   ca     1   OCT   C83  174     0.084100     12.01000 ; qtot -4.984
   175   ca     1   OCT   C82  175    -0.192500     12.01000 ; qtot -5.177
   176   ha     1   OCT   H46  176     0.146500      1.00800 ; qtot -5.030
   177   ca     1   OCT   C80  177    -0.114300     12.01000 ; qtot -5.145
   178   ha     1   OCT   H42  178     0.166000      1.00800 ; qtot -4.979
   179   ca     1   OCT   C84  179    -0.109000     12.01000 ; qtot -5.088
   180    c     1   OCT   C85  180     0.910401     12.01000 ; qtot -4.177
   181    o     1   OCT   O17  181    -0.837901     16.00000 ; qtot -5.015
   182    o     1   OCT   O18  182    -0.839701     16.00000 ; qtot -5.855
   183   ca     1   OCT   C81  183    -0.115500     12.01000 ; qtot -5.970
   184   ha     1   OCT   H41  184     0.165100      1.00800 ; qtot -5.805
   185   ca     1   OCT   C79  185     0.069300     12.01000 ; qtot -5.736
   186   os     1   OCT   O12  186    -0.264000     16.00000 ; qtot -6.000

[ bonds ]
;   ai     aj funct   r             k
     1      2   1    1.2140e-01    5.4225e+05 ;    O29 - C93   
     2      3   1    1.2140e-01    5.4225e+05 ;    C93 - O30   
     2      4   1    1.5080e-01    2.7472e+05 ;    C93 - C30   
     4      5   1    1.0920e-01    2.8225e+05 ;    C30 - H49   
     4      6   1    1.0920e-01    2.8225e+05 ;    C30 - H50   
     4      7   1    1.5350e-01    2.5363e+05 ;    C30 - C29   
     7      8   1    1.0920e-01    2.8225e+05 ;    C29 - H13   
     7      9   1    1.0920e-01    2.8225e+05 ;    C29 - H14   
     7     10   1    1.5350e-01    2.5363e+05 ;    C29 - C8    
    10     11   1    1.0920e-01    2.8225e+05 ;     C8 - H4    
    10     12   1    1.5130e-01    2.7070e+05 ;     C8 - C5    
    10     48   1    1.5130e-01    2.7070e+05 ;     C8 - C15   
    12     13   1    1.3870e-01    4.0033e+05 ;     C5 - C2    
    12     35   1    1.3870e-01    4.0033e+05 ;     C5 - C4    
    13     14   1    1.0870e-01    2.8811e+05 ;     C2 - H2    
    13     15   1    1.3870e-01    4.0033e+05 ;     C2 - C6    
    15     16   1    1.5130e-01    2.7070e+05 ;     C6 - C7    
    15     31   1    1.3870e-01    4.0033e+05 ;     C6 - C3    
    16     17   1    1.0920e-01    2.8225e+05 ;     C7 - H3    
    16     18   1    1.5130e-01    2.7070e+05 ;     C7 - C9    
    16     21   1    1.5350e-01    2.5363e+05 ;     C7 - C31   
    18     19   1    1.3870e-01    4.0033e+05 ;     C9 - C12   
    18    106   1    1.3870e-01    4.0033e+05 ;     C9 - C11   
    19     20   1    1.0870e-01    2.8811e+05 ;    C12 - H5    
    19    102   1    1.3870e-01    4.0033e+05 ;    C12 - C13   
    21     22   1    1.0920e-01    2.8225e+05 ;    C31 - H15   
    21     23   1    1.5350e-01    2.5363e+05 ;    C31 - C32   
    21     30   1    1.0920e-01    2.8225e+05 ;    C31 - H16   
    23     24   1    1.0920e-01    2.8225e+05 ;    C32 - H55   
    23     25   1    1.0920e-01    2.8225e+05 ;    C32 - H56   
    23     26   1    1.5080e-01    2.7472e+05 ;    C32 - C96   
    26     27   1    1.2140e-01    5.4225e+05 ;    C96 - O31   
    26     28   1    1.3060e-01    3.9028e+05 ;    C96 - O32   
    28     29   1    9.7400e-02    3.0928e+05 ;    O32 - H58   
    31     32   1    1.3730e-01    3.1162e+05 ;     C3 - O4    
    31     33   1    1.3870e-01    4.0033e+05 ;     C3 - C1    
    32    108   1    1.4390e-01    2.5230e+05 ;     O4 - C37   
    33     34   1    1.0870e-01    2.8811e+05 ;     C1 - H1    
    33     35   1    1.3870e-01    4.0033e+05 ;     C1 - C4    
    35     36   1    1.3730e-01    3.1162e+05 ;     C4 - O7    
    36     37   1    1.4390e-01    2.5230e+05 ;     O7 - C39   
    37     38   1    1.1000e-01    2.7313e+05 ;    C39 - H23   
    37     39   1    1.5130e-01    2.7070e+05 ;    C39 - C41   
    37     44   1    1.4390e-01    2.5230e+05 ;    C39 - O8    
    39     40   1    1.3870e-01    4.0033e+05 ;    C41 - C43   
    39     42   1    1.3870e-01    4.0033e+05 ;    C41 - C44   
    40     41   1    1.0870e-01    2.8811e+05 ;    C43 - H25   
    40    169   1    1.3870e-01    4.0033e+05 ;    C43 - C46   
    42     43   1    1.0870e-01    2.8811e+05 ;    C44 - H26   
    42    172   1    1.3870e-01    4.0033e+05 ;    C44 - C45   
    44     45   1    1.3730e-01    3.1162e+05 ;     O8 - C18   
    45     46   1    1.3870e-01    4.0033e+05 ;    C18 - C19   
    45     48   1    1.3870e-01    4.0033e+05 ;    C18 - C15   
    46     47   1    1.0870e-01    2.8811e+05 ;    C19 - H8    
    46     64   1    1.3870e-01    4.0033e+05 ;    C19 - C16   
    48     49   1    1.3870e-01    4.0033e+05 ;    C15 - C17   
    49     50   1    1.0870e-01    2.8811e+05 ;    C17 - H7    
    49     51   1    1.3870e-01    4.0033e+05 ;    C17 - C20   
    51     52   1    1.5130e-01    2.7070e+05 ;    C20 - C21   
    51     64   1    1.3870e-01    4.0033e+05 ;    C20 - C16   
    52     53   1    1.0920e-01    2.8225e+05 ;    C21 - H9    
    52     54   1    1.5350e-01    2.5363e+05 ;    C21 - C35   
    52     87   1    1.5130e-01    2.7070e+05 ;    C21 - C27   
    54     55   1    1.0920e-01    2.8225e+05 ;    C35 - H19   
    54     56   1    1.5350e-01    2.5363e+05 ;    C35 - C36   
    54     63   1    1.0920e-01    2.8225e+05 ;    C35 - H20   
    56     57   1    1.0920e-01    2.8225e+05 ;    C36 - H51   
    56     58   1    1.0920e-01    2.8225e+05 ;    C36 - H52   
    56     59   1    1.5080e-01    2.7472e+05 ;    C36 - C94   
    59     60   1    1.2140e-01    5.4225e+05 ;    C94 - O27   
    59     61   1    1.3060e-01    3.9028e+05 ;    C94 - O28   
    61     62   1    9.7400e-02    3.0928e+05 ;    O28 - H57   
    64     65   1    1.3730e-01    3.1162e+05 ;    C16 - O2    
    65     66   1    1.4390e-01    2.5230e+05 ;     O2 - C40   
    66     67   1    1.1000e-01    2.7313e+05 ;    C40 - H24   
    66     68   1    1.5130e-01    2.7070e+05 ;    C40 - C47   
    66     73   1    1.4390e-01    2.5230e+05 ;    C40 - O1    
    68     69   1    1.3870e-01    4.0033e+05 ;    C47 - C49   
    68     71   1    1.3870e-01    4.0033e+05 ;    C47 - C50   
    69     70   1    1.0870e-01    2.8811e+05 ;    C49 - H28   
    69    154   1    1.3870e-01    4.0033e+05 ;    C49 - C52   
    71     72   1    1.0870e-01    2.8811e+05 ;    C50 - H29   
    71    151   1    1.3870e-01    4.0033e+05 ;    C50 - C51   
    73     74   1    1.3730e-01    3.1162e+05 ;     O1 - C24   
    74     75   1    1.3870e-01    4.0033e+05 ;    C24 - C28   
    74     87   1    1.3870e-01    4.0033e+05 ;    C24 - C27   
    75     76   1    1.3870e-01    4.0033e+05 ;    C28 - C25   
    75     86   1    1.0870e-01    2.8811e+05 ;    C28 - H12   
    76     77   1    1.3730e-01    3.1162e+05 ;    C25 - O3    
    76     90   1    1.3870e-01    4.0033e+05 ;    C25 - C23   
    77     78   1    1.4390e-01    2.5230e+05 ;     O3 - C38   
    78     79   1    1.4390e-01    2.5230e+05 ;    C38 - O6    
    78     80   1    1.1000e-01    2.7313e+05 ;    C38 - H22   
    78     81   1    1.5130e-01    2.7070e+05 ;    C38 - C53   
    79    103   1    1.3730e-01    3.1162e+05 ;     O6 - C10   
    81     82   1    1.3870e-01    4.0033e+05 ;    C53 - C55   
    81     84   1    1.3870e-01    4.0033e+05 ;    C53 - C56   
    82     83   1    1.0870e-01    2.8811e+05 ;    C55 - H31   
    82    136   1    1.3870e-01    4.0033e+05 ;    C55 - C58   
    84     85   1    1.0870e-01    2.8811e+05 ;    C56 - H32   
    84    133   1    1.3870e-01    4.0033e+05 ;    C56 - C57   
    87     88   1    1.3870e-01    4.0033e+05 ;    C27 - C26   
    88     89   1    1.0870e-01    2.8811e+05 ;    C26 - H11   
    88     90   1    1.3870e-01    4.0033e+05 ;    C26 - C23   
    90     91   1    1.5130e-01    2.7070e+05 ;    C23 - C22   
    91     92   1    1.0920e-01    2.8225e+05 ;    C22 - H10   
    91     93   1    1.5350e-01    2.5363e+05 ;    C22 - C33   
    91    102   1    1.5130e-01    2.7070e+05 ;    C22 - C13   
    93     94   1    1.0920e-01    2.8225e+05 ;    C33 - H17   
    93     95   1    1.5350e-01    2.5363e+05 ;    C33 - C34   
    93    101   1    1.0920e-01    2.8225e+05 ;    C33 - H18   
    95     96   1    1.0920e-01    2.8225e+05 ;    C34 - H53   
    95     97   1    1.0920e-01    2.8225e+05 ;    C34 - H54   
    95     98   1    1.5080e-01    2.7472e+05 ;    C34 - C95   
    98     99   1    1.2140e-01    5.4225e+05 ;    C95 - O25   
    98    100   1    1.2140e-01    5.4225e+05 ;    C95 - O26   
   102    103   1    1.3870e-01    4.0033e+05 ;    C13 - C10   
   103    104   1    1.3870e-01    4.0033e+05 ;    C10 - C14   
   104    105   1    1.0870e-01    2.8811e+05 ;    C14 - H6    
   104    106   1    1.3870e-01    4.0033e+05 ;    C14 - C11   
   106    107   1    1.3730e-01    3.1162e+05 ;    C11 - O5    
   107    108   1    1.4390e-01    2.5230e+05 ;     O5 - C37   
   108    109   1    1.1000e-01    2.7313e+05 ;    C37 - H21   
   108    110   1    1.5130e-01    2.7070e+05 ;    C37 - C59   
   110    111   1    1.3870e-01    4.0033e+05 ;    C59 - C62   
   110    113   1    1.3870e-01    4.0033e+05 ;    C59 - C61   
   111    112   1    1.0870e-01    2.8811e+05 ;    C62 - H35   
   111    118   1    1.3870e-01    4.0033e+05 ;    C62 - C63   
   113    114   1    1.0870e-01    2.8811e+05 ;    C61 - H34   
   113    115   1    1.3870e-01    4.0033e+05 ;    C61 - C64   
   115    116   1    1.3870e-01    4.0033e+05 ;    C64 - C60   
   115    186   1    1.3730e-01    3.1162e+05 ;    C64 - O12   
   116    117   1    1.0870e-01    2.8811e+05 ;    C60 - H36   
   116    118   1    1.3870e-01    4.0033e+05 ;    C60 - C63   
   118    119   1    1.3730e-01    3.1162e+05 ;    C63 - O15   
   119    120   1    1.3730e-01    3.1162e+05 ;    O15 - C77   
   120    121   1    1.3870e-01    4.0033e+05 ;    C77 - C74   
   120    123   1    1.3870e-01    4.0033e+05 ;    C77 - C73   
   121    122   1    1.0870e-01    2.8811e+05 ;    C74 - H45   
   121    131   1    1.3870e-01    4.0033e+05 ;    C74 - C72   
   123    124   1    1.0870e-01    2.8811e+05 ;    C73 - H40   
   123    125   1    1.3870e-01    4.0033e+05 ;    C73 - C76   
   125    126   1    1.4870e-01    2.9263e+05 ;    C76 - C78   
   125    129   1    1.3870e-01    4.0033e+05 ;    C76 - C75   
   126    127   1    1.2140e-01    5.4225e+05 ;    C78 - O19   
   126    128   1    1.2140e-01    5.4225e+05 ;    C78 - O20   
   129    130   1    1.0870e-01    2.8811e+05 ;    C75 - H39   
   129    131   1    1.3870e-01    4.0033e+05 ;    C75 - C72   
   131    132   1    1.3730e-01    3.1162e+05 ;    C72 - O14   
   132    133   1    1.3730e-01    3.1162e+05 ;    O14 - C57   
   133    134   1    1.3870e-01    4.0033e+05 ;    C57 - C54   
   134    135   1    1.0870e-01    2.8811e+05 ;    C54 - H33   
   134    136   1    1.3870e-01    4.0033e+05 ;    C54 - C58   
   136    137   1    1.3730e-01    3.1162e+05 ;    C58 - O13   
   137    138   1    1.3730e-01    3.1162e+05 ;    O13 - C70   
   138    139   1    1.3870e-01    4.0033e+05 ;    C70 - C67   
   138    141   1    1.3870e-01    4.0033e+05 ;    C70 - C66   
   139    140   1    1.0870e-01    2.8811e+05 ;    C67 - H48   
   139    149   1    1.3870e-01    4.0033e+05 ;    C67 - C65   
   141    142   1    1.0870e-01    2.8811e+05 ;    C66 - H38   
   141    143   1    1.3870e-01    4.0033e+05 ;    C66 - C69   
   143    144   1    1.4870e-01    2.9263e+05 ;    C69 - C71   
   143    147   1    1.3870e-01    4.0033e+05 ;    C69 - C68   
   144    145   1    1.2140e-01    5.4225e+05 ;    C71 - O21   
   144    146   1    1.2140e-01    5.4225e+05 ;    C71 - O22   
   147    148   1    1.0870e-01    2.8811e+05 ;    C68 - H37   
   147    149   1    1.3870e-01    4.0033e+05 ;    C68 - C65   
   149    150   1    1.3730e-01    3.1162e+05 ;    C65 - O11   
   150    151   1    1.3730e-01    3.1162e+05 ;    O11 - C51   
   151    152   1    1.3870e-01    4.0033e+05 ;    C51 - C48   
   152    153   1    1.0870e-01    2.8811e+05 ;    C48 - H30   
   152    154   1    1.3870e-01    4.0033e+05 ;    C48 - C52   
   154    155   1    1.3730e-01    3.1162e+05 ;    C52 - O10   
   155    156   1    1.3730e-01    3.1162e+05 ;    O10 - C91   
   156    157   1    1.3870e-01    4.0033e+05 ;    C91 - C88   
   156    159   1    1.3870e-01    4.0033e+05 ;    C91 - C87   
   157    158   1    1.0870e-01    2.8811e+05 ;    C88 - H47   
   157    167   1    1.3870e-01    4.0033e+05 ;    C88 - C86   
   159    160   1    1.0870e-01    2.8811e+05 ;    C87 - H44   
   159    161   1    1.3870e-01    4.0033e+05 ;    C87 - C90   
   161    162   1    1.4870e-01    2.9263e+05 ;    C90 - C92   
   161    165   1    1.3870e-01    4.0033e+05 ;    C90 - C89   
   162    163   1    1.2140e-01    5.4225e+05 ;    C92 - O23   
   162    164   1    1.2140e-01    5.4225e+05 ;    C92 - O24   
   165    166   1    1.0870e-01    2.8811e+05 ;    C89 - H43   
   165    167   1    1.3870e-01    4.0033e+05 ;    C89 - C86   
   167    168   1    1.3730e-01    3.1162e+05 ;    C86 - O16   
   168    169   1    1.3730e-01    3.1162e+05 ;    O16 - C46   
   169    170   1    1.3870e-01    4.0033e+05 ;    C46 - C42   
   170    171   1    1.0870e-01    2.8811e+05 ;    C42 - H27   
   170    172   1    1.3870e-01    4.0033e+05 ;    C42 - C45   
   172    173   1    1.3730e-01    3.1162e+05 ;    C45 - O9    
   173    174   1    1.3730e-01    3.1162e+05 ;     O9 - C83   
   174    175   1    1.3870e-01    4.0033e+05 ;    C83 - C82   
   174    177   1    1.3870e-01    4.0033e+05 ;    C83 - C80   
   175    176   1    1.0870e-01    2.8811e+05 ;    C82 - H46   
   175    185   1    1.3870e-01    4.0033e+05 ;    C82 - C79   
   177    178   1    1.0870e-01    2.8811e+05 ;    C80 - H42   
   177    179   1    1.3870e-01    4.0033e+05 ;    C80 - C84   
   179    180   1    1.4870e-01    2.9263e+05 ;    C84 - C85   
   179    183   1    1.3870e-01    4.0033e+05 ;    C84 - C81   
   180    181   1    1.2140e-01    5.4225e+05 ;    C85 - O17   
   180    182   1    1.2140e-01    5.4225e+05 ;    C85 - O18   
   183    184   1    1.0870e-01    2.8811e+05 ;    C81 - H41   
   183    185   1    1.3870e-01    4.0033e+05 ;    C81 - C79   
   185    186   1    1.3730e-01    3.1162e+05 ;    C79 - O12   

[ pairs ]
;   ai     aj    funct
     1      5      1 ;    O29 - H49   
     1      6      1 ;    O29 - H50   
     1      7      1 ;    O29 - C29   
     2      8      1 ;    C93 - H13   
     2      9      1 ;    C93 - H14   
     2     10      1 ;    C93 - C8    
     3      5      1 ;    O30 - H49   
     3      6      1 ;    O30 - H50   
     3      7      1 ;    O30 - C29   
     4     11      1 ;    C30 - H4    
     4     12      1 ;    C30 - C5    
     4     48      1 ;    C30 - C15   
     5      8      1 ;    H49 - H13   
     5      9      1 ;    H49 - H14   
     5     10      1 ;    H49 - C8    
     6      8      1 ;    H50 - H13   
     6      9      1 ;    H50 - H14   
     6     10      1 ;    H50 - C8    
     7     13      1 ;    C29 - C2    
     7     35      1 ;    C29 - C4    
     7     45      1 ;    C29 - C18   
     7     49      1 ;    C29 - C17   
     8     11      1 ;    H13 - H4    
     8     12      1 ;    H13 - C5    
     8     48      1 ;    H13 - C15   
     9     11      1 ;    H14 - H4    
     9     12      1 ;    H14 - C5    
     9     48      1 ;    H14 - C15   
    10     14      1 ;     C8 - H2    
    10     15      1 ;     C8 - C6    
    10     33      1 ;     C8 - C1    
    10     36      1 ;     C8 - O7    
    10     44      1 ;     C8 - O8    
    10     46      1 ;     C8 - C19   
    10     50      1 ;     C8 - H7    
    10     51      1 ;     C8 - C20   
    11     13      1 ;     H4 - C2    
    11     35      1 ;     H4 - C4    
    11     45      1 ;     H4 - C18   
    11     49      1 ;     H4 - C17   
    12     16      1 ;     C5 - C7    
    12     31      1 ;     C5 - C3    
    12     34      1 ;     C5 - H1    
    12     37      1 ;     C5 - C39   
    12     45      1 ;     C5 - C18   
    12     49      1 ;     C5 - C17   
    13     17      1 ;     C2 - H3    
    13     18      1 ;     C2 - C9    
    13     21      1 ;     C2 - C31   
    13     32      1 ;     C2 - O4    
    13     33      1 ;     C2 - C1    
    13     36      1 ;     C2 - O7    
    13     48      1 ;     C2 - C15   
    14     16      1 ;     H2 - C7    
    14     31      1 ;     H2 - C3    
    14     35      1 ;     H2 - C4    
    15     19      1 ;     C6 - C12   
    15     22      1 ;     C6 - H15   
    15     23      1 ;     C6 - C32   
    15     30      1 ;     C6 - H16   
    15     34      1 ;     C6 - H1    
    15     35      1 ;     C6 - C4    
    15    106      1 ;     C6 - C11   
    15    108      1 ;     C6 - C37   
    16     20      1 ;     C7 - H5    
    16     24      1 ;     C7 - H55   
    16     25      1 ;     C7 - H56   
    16     26      1 ;     C7 - C96   
    16     32      1 ;     C7 - O4    
    16     33      1 ;     C7 - C1    
    16    102      1 ;     C7 - C13   
    16    104      1 ;     C7 - C14   
    16    107      1 ;     C7 - O5    
    17     19      1 ;     H3 - C12   
    17     22      1 ;     H3 - H15   
    17     23      1 ;     H3 - C32   
    17     30      1 ;     H3 - H16   
    17     31      1 ;     H3 - C3    
    17    106      1 ;     H3 - C11   
    18     22      1 ;     C9 - H15   
    18     23      1 ;     C9 - C32   
    18     30      1 ;     C9 - H16   
    18     31      1 ;     C9 - C3    
    18     91      1 ;     C9 - C22   
    18    103      1 ;     C9 - C10   
    18    105      1 ;     C9 - H6    
    18    108      1 ;     C9 - C37   
    19     21      1 ;    C12 - C31   
    19     79      1 ;    C12 - O6    
    19     90      1 ;    C12 - C23   
    19     92      1 ;    C12 - H10   
    19     93      1 ;    C12 - C33   
    19    104      1 ;    C12 - C14   
    19    107      1 ;    C12 - O5    
    20     91      1 ;     H5 - C22   
    20    103      1 ;     H5 - C10   
    20    106      1 ;     H5 - C11   
    21     27      1 ;    C31 - O31   
    21     28      1 ;    C31 - O32   
    21     31      1 ;    C31 - C3    
    21    106      1 ;    C31 - C11   
    22     24      1 ;    H15 - H55   
    22     25      1 ;    H15 - H56   
    22     26      1 ;    H15 - C96   
    23     29      1 ;    C32 - H58   
    24     27      1 ;    H55 - O31   
    24     28      1 ;    H55 - O32   
    24     30      1 ;    H55 - H16   
    25     27      1 ;    H56 - O31   
    25     28      1 ;    H56 - O32   
    25     30      1 ;    H56 - H16   
    26     30      1 ;    C96 - H16   
    27     29      1 ;    O31 - H58   
    31     36      1 ;     C3 - O7    
    31    107      1 ;     C3 - O5    
    31    109      1 ;     C3 - H21   
    31    110      1 ;     C3 - C59   
    32     34      1 ;     O4 - H1    
    32     35      1 ;     O4 - C4    
    32    106      1 ;     O4 - C11   
    32    111      1 ;     O4 - C62   
    32    113      1 ;     O4 - C61   
    33     37      1 ;     C1 - C39   
    33    108      1 ;     C1 - C37   
    34     36      1 ;     H1 - O7    
    35     38      1 ;     C4 - H23   
    35     39      1 ;     C4 - C41   
    35     44      1 ;     C4 - O8    
    35     48      1 ;     C4 - C15   
    36     40      1 ;     O7 - C43   
    36     42      1 ;     O7 - C44   
    36     45      1 ;     O7 - C18   
    37     41      1 ;    C39 - H25   
    37     43      1 ;    C39 - H26   
    37     46      1 ;    C39 - C19   
    37     48      1 ;    C39 - C15   
    37    169      1 ;    C39 - C46   
    37    172      1 ;    C39 - C45   
    38     40      1 ;    H23 - C43   
    38     42      1 ;    H23 - C44   
    38     45      1 ;    H23 - C18   
    39     45      1 ;    C41 - C18   
    39    168      1 ;    C41 - O16   
    39    170      1 ;    C41 - C42   
    39    173      1 ;    C41 - O9    
    40     43      1 ;    C43 - H26   
    40     44      1 ;    C43 - O8    
    40    167      1 ;    C43 - C86   
    40    171      1 ;    C43 - H27   
    40    172      1 ;    C43 - C45   
    41     42      1 ;    H25 - C44   
    41    168      1 ;    H25 - O16   
    41    170      1 ;    H25 - C42   
    42     44      1 ;    C44 - O8    
    42    169      1 ;    C44 - C46   
    42    171      1 ;    C44 - H27   
    42    174      1 ;    C44 - C83   
    43    170      1 ;    H26 - C42   
    43    173      1 ;    H26 - O9    
    44     47      1 ;     O8 - H8    
    44     49      1 ;     O8 - C17   
    44     64      1 ;     O8 - C16   
    45     50      1 ;    C18 - H7    
    45     51      1 ;    C18 - C20   
    45     65      1 ;    C18 - O2    
    46     49      1 ;    C19 - C17   
    46     52      1 ;    C19 - C21   
    46     66      1 ;    C19 - C40   
    47     48      1 ;     H8 - C15   
    47     51      1 ;     H8 - C20   
    47     65      1 ;     H8 - O2    
    48     52      1 ;    C15 - C21   
    48     64      1 ;    C15 - C16   
    49     53      1 ;    C17 - H9    
    49     54      1 ;    C17 - C35   
    49     65      1 ;    C17 - O2    
    49     87      1 ;    C17 - C27   
    50     52      1 ;     H7 - C21   
    50     64      1 ;     H7 - C16   
    51     55      1 ;    C20 - H19   
    51     56      1 ;    C20 - C36   
    51     63      1 ;    C20 - H20   
    51     66      1 ;    C20 - C40   
    51     74      1 ;    C20 - C24   
    51     88      1 ;    C20 - C26   
    52     57      1 ;    C21 - H51   
    52     58      1 ;    C21 - H52   
    52     59      1 ;    C21 - C94   
    52     65      1 ;    C21 - O2    
    52     73      1 ;    C21 - O1    
    52     75      1 ;    C21 - C28   
    52     89      1 ;    C21 - H11   
    52     90      1 ;    C21 - C23   
    53     55      1 ;     H9 - H19   
    53     56      1 ;     H9 - C36   
    53     63      1 ;     H9 - H20   
    53     64      1 ;     H9 - C16   
    53     74      1 ;     H9 - C24   
    53     88      1 ;     H9 - C26   
    54     60      1 ;    C35 - O27   
    54     61      1 ;    C35 - O28   
    54     64      1 ;    C35 - C16   
    54     74      1 ;    C35 - C24   
    54     88      1 ;    C35 - C26   
    55     57      1 ;    H19 - H51   
    55     58      1 ;    H19 - H52   
    55     59      1 ;    H19 - C94   
    55     87      1 ;    H19 - C27   
    56     62      1 ;    C36 - H57   
    56     87      1 ;    C36 - C27   
    57     60      1 ;    H51 - O27   
    57     61      1 ;    H51 - O28   
    57     63      1 ;    H51 - H20   
    58     60      1 ;    H52 - O27   
    58     61      1 ;    H52 - O28   
    58     63      1 ;    H52 - H20   
    59     63      1 ;    C94 - H20   
    60     62      1 ;    O27 - H57   
    63     87      1 ;    H20 - C27   
    64     67      1 ;    C16 - H24   
    64     68      1 ;    C16 - C47   
    64     73      1 ;    C16 - O1    
    64     87      1 ;    C16 - C27   
    65     69      1 ;     O2 - C49   
    65     71      1 ;     O2 - C50   
    65     74      1 ;     O2 - C24   
    66     70      1 ;    C40 - H28   
    66     72      1 ;    C40 - H29   
    66     75      1 ;    C40 - C28   
    66     87      1 ;    C40 - C27   
    66    151      1 ;    C40 - C51   
    66    154      1 ;    C40 - C52   
    67     69      1 ;    H24 - C49   
    67     71      1 ;    H24 - C50   
    67     74      1 ;    H24 - C24   
    68     74      1 ;    C47 - C24   
    68    150      1 ;    C47 - O11   
    68    152      1 ;    C47 - C48   
    68    155      1 ;    C47 - O10   
    69     72      1 ;    C49 - H29   
    69     73      1 ;    C49 - O1    
    69    151      1 ;    C49 - C51   
    69    153      1 ;    C49 - H30   
    69    156      1 ;    C49 - C91   
    70     71      1 ;    H28 - C50   
    70    152      1 ;    H28 - C48   
    70    155      1 ;    H28 - O10   
    71     73      1 ;    C50 - O1    
    71    149      1 ;    C50 - C65   
    71    153      1 ;    C50 - H30   
    71    154      1 ;    C50 - C52   
    72    150      1 ;    H29 - O11   
    72    152      1 ;    H29 - C48   
    73     76      1 ;     O1 - C25   
    73     86      1 ;     O1 - H12   
    73     88      1 ;     O1 - C26   
    74     77      1 ;    C24 - O3    
    74     89      1 ;    C24 - H11   
    74     90      1 ;    C24 - C23   
    75     78      1 ;    C28 - C38   
    75     88      1 ;    C28 - C26   
    75     91      1 ;    C28 - C22   
    76     79      1 ;    C25 - O6    
    76     80      1 ;    C25 - H22   
    76     81      1 ;    C25 - C53   
    76     87      1 ;    C25 - C27   
    76     89      1 ;    C25 - H11   
    76     92      1 ;    C25 - H10   
    76     93      1 ;    C25 - C33   
    76    102      1 ;    C25 - C13   
    77     82      1 ;     O3 - C55   
    77     84      1 ;     O3 - C56   
    77     86      1 ;     O3 - H12   
    77     88      1 ;     O3 - C26   
    77     91      1 ;     O3 - C22   
    77    103      1 ;     O3 - C10   
    78     83      1 ;    C38 - H31   
    78     85      1 ;    C38 - H32   
    78     90      1 ;    C38 - C23   
    78    102      1 ;    C38 - C13   
    78    104      1 ;    C38 - C14   
    78    133      1 ;    C38 - C57   
    78    136      1 ;    C38 - C58   
    79     82      1 ;     O6 - C55   
    79     84      1 ;     O6 - C56   
    79     91      1 ;     O6 - C22   
    79    105      1 ;     O6 - H6    
    79    106      1 ;     O6 - C11   
    80     82      1 ;    H22 - C55   
    80     84      1 ;    H22 - C56   
    80    103      1 ;    H22 - C10   
    81    103      1 ;    C53 - C10   
    81    132      1 ;    C53 - O14   
    81    134      1 ;    C53 - C54   
    81    137      1 ;    C53 - O13   
    82     85      1 ;    C55 - H32   
    82    133      1 ;    C55 - C57   
    82    135      1 ;    C55 - H33   
    82    138      1 ;    C55 - C70   
    83     84      1 ;    H31 - C56   
    83    134      1 ;    H31 - C54   
    83    137      1 ;    H31 - O13   
    84    131      1 ;    C56 - C72   
    84    135      1 ;    C56 - H33   
    84    136      1 ;    C56 - C58   
    85    132      1 ;    H32 - O14   
    85    134      1 ;    H32 - C54   
    86     87      1 ;    H12 - C27   
    86     90      1 ;    H12 - C23   
    87     91      1 ;    C27 - C22   
    88     92      1 ;    C26 - H10   
    88     93      1 ;    C26 - C33   
    88    102      1 ;    C26 - C13   
    89     91      1 ;    H11 - C22   
    90     94      1 ;    C23 - H17   
    90     95      1 ;    C23 - C34   
    90    101      1 ;    C23 - H18   
    90    103      1 ;    C23 - C10   
    91     96      1 ;    C22 - H53   
    91     97      1 ;    C22 - H54   
    91     98      1 ;    C22 - C95   
    91    104      1 ;    C22 - C14   
    92     94      1 ;    H10 - H17   
    92     95      1 ;    H10 - C34   
    92    101      1 ;    H10 - H18   
    92    103      1 ;    H10 - C10   
    93     99      1 ;    C33 - O25   
    93    100      1 ;    C33 - O26   
    93    103      1 ;    C33 - C10   
    94     96      1 ;    H17 - H53   
    94     97      1 ;    H17 - H54   
    94     98      1 ;    H17 - C95   
    94    102      1 ;    H17 - C13   
    95    102      1 ;    C34 - C13   
    96     99      1 ;    H53 - O25   
    96    100      1 ;    H53 - O26   
    96    101      1 ;    H53 - H18   
    97     99      1 ;    H54 - O25   
    97    100      1 ;    H54 - O26   
    97    101      1 ;    H54 - H18   
    98    101      1 ;    C95 - H18   
   101    102      1 ;    H18 - C13   
   102    105      1 ;    C13 - H6    
   102    106      1 ;    C13 - C11   
   103    107      1 ;    C10 - O5    
   104    108      1 ;    C14 - C37   
   105    107      1 ;     H6 - O5    
   106    109      1 ;    C11 - H21   
   106    110      1 ;    C11 - C59   
   107    111      1 ;     O5 - C62   
   107    113      1 ;     O5 - C61   
   108    112      1 ;    C37 - H35   
   108    114      1 ;    C37 - H34   
   108    115      1 ;    C37 - C64   
   108    118      1 ;    C37 - C63   
   109    111      1 ;    H21 - C62   
   109    113      1 ;    H21 - C61   
   110    116      1 ;    C59 - C60   
   110    119      1 ;    C59 - O15   
   110    186      1 ;    C59 - O12   
   111    114      1 ;    C62 - H34   
   111    115      1 ;    C62 - C64   
   111    117      1 ;    C62 - H36   
   111    120      1 ;    C62 - C77   
   112    113      1 ;    H35 - C61   
   112    116      1 ;    H35 - C60   
   112    119      1 ;    H35 - O15   
   113    117      1 ;    C61 - H36   
   113    118      1 ;    C61 - C63   
   113    185      1 ;    C61 - C79   
   114    116      1 ;    H34 - C60   
   114    186      1 ;    H34 - O12   
   115    119      1 ;    C64 - O15   
   115    175      1 ;    C64 - C82   
   115    183      1 ;    C64 - C81   
   116    120      1 ;    C60 - C77   
   116    185      1 ;    C60 - C79   
   117    119      1 ;    H36 - O15   
   117    186      1 ;    H36 - O12   
   118    121      1 ;    C63 - C74   
   118    123      1 ;    C63 - C73   
   118    186      1 ;    C63 - O12   
   119    122      1 ;    O15 - H45   
   119    124      1 ;    O15 - H40   
   119    125      1 ;    O15 - C76   
   119    131      1 ;    O15 - C72   
   120    126      1 ;    C77 - C78   
   120    129      1 ;    C77 - C75   
   120    132      1 ;    C77 - O14   
   121    124      1 ;    C74 - H40   
   121    125      1 ;    C74 - C76   
   121    130      1 ;    C74 - H39   
   121    133      1 ;    C74 - C57   
   122    123      1 ;    H45 - C73   
   122    129      1 ;    H45 - C75   
   122    132      1 ;    H45 - O14   
   123    127      1 ;    C73 - O19   
   123    128      1 ;    C73 - O20   
   123    130      1 ;    C73 - H39   
   123    131      1 ;    C73 - C72   
   124    126      1 ;    H40 - C78   
   124    129      1 ;    H40 - C75   
   125    132      1 ;    C76 - O14   
   126    130      1 ;    C78 - H39   
   126    131      1 ;    C78 - C72   
   127    129      1 ;    O19 - C75   
   128    129      1 ;    O20 - C75   
   129    133      1 ;    C75 - C57   
   130    132      1 ;    H39 - O14   
   131    134      1 ;    C72 - C54   
   132    135      1 ;    O14 - H33   
   132    136      1 ;    O14 - C58   
   133    137      1 ;    C57 - O13   
   134    138      1 ;    C54 - C70   
   135    137      1 ;    H33 - O13   
   136    139      1 ;    C58 - C67   
   136    141      1 ;    C58 - C66   
   137    140      1 ;    O13 - H48   
   137    142      1 ;    O13 - H38   
   137    143      1 ;    O13 - C69   
   137    149      1 ;    O13 - C65   
   138    144      1 ;    C70 - C71   
   138    147      1 ;    C70 - C68   
   138    150      1 ;    C70 - O11   
   139    142      1 ;    C67 - H38   
   139    143      1 ;    C67 - C69   
   139    148      1 ;    C67 - H37   
   139    151      1 ;    C67 - C51   
   140    141      1 ;    H48 - C66   
   140    147      1 ;    H48 - C68   
   140    150      1 ;    H48 - O11   
   141    145      1 ;    C66 - O21   
   141    146      1 ;    C66 - O22   
   141    148      1 ;    C66 - H37   
   141    149      1 ;    C66 - C65   
   142    144      1 ;    H38 - C71   
   142    147      1 ;    H38 - C68   
   143    150      1 ;    C69 - O11   
   144    148      1 ;    C71 - H37   
   144    149      1 ;    C71 - C65   
   145    147      1 ;    O21 - C68   
   146    147      1 ;    O22 - C68   
   147    151      1 ;    C68 - C51   
   148    150      1 ;    H37 - O11   
   149    152      1 ;    C65 - C48   
   150    153      1 ;    O11 - H30   
   150    154      1 ;    O11 - C52   
   151    155      1 ;    C51 - O10   
   152    156      1 ;    C48 - C91   
   153    155      1 ;    H30 - O10   
   154    157      1 ;    C52 - C88   
   154    159      1 ;    C52 - C87   
   155    158      1 ;    O10 - H47   
   155    160      1 ;    O10 - H44   
   155    161      1 ;    O10 - C90   
   155    167      1 ;    O10 - C86   
   156    162      1 ;    C91 - C92   
   156    165      1 ;    C91 - C89   
   156    168      1 ;    C91 - O16   
   157    160      1 ;    C88 - H44   
   157    161      1 ;    C88 - C90   
   157    166      1 ;    C88 - H43   
   157    169      1 ;    C88 - C46   
   158    159      1 ;    H47 - C87   
   158    165      1 ;    H47 - C89   
   158    168      1 ;    H47 - O16   
   159    163      1 ;    C87 - O23   
   159    164      1 ;    C87 - O24   
   159    166      1 ;    C87 - H43   
   159    167      1 ;    C87 - C86   
   160    162      1 ;    H44 - C92   
   160    165      1 ;    H44 - C89   
   161    168      1 ;    C90 - O16   
   162    166      1 ;    C92 - H43   
   162    167      1 ;    C92 - C86   
   163    165      1 ;    O23 - C89   
   164    165      1 ;    O24 - C89   
   165    169      1 ;    C89 - C46   
   166    168      1 ;    H43 - O16   
   167    170      1 ;    C86 - C42   
   168    171      1 ;    O16 - H27   
   168    172      1 ;    O16 - C45   
   169    173      1 ;    C46 - O9    
   170    174      1 ;    C42 - C83   
   171    173      1 ;    H27 - O9    
   172    175      1 ;    C45 - C82   
   172    177      1 ;    C45 - C80   
   173    176      1 ;     O9 - H46   
   173    178      1 ;     O9 - H42   
   173    179      1 ;     O9 - C84   
   173    185      1 ;     O9 - C79   
   174    180      1 ;    C83 - C85   
   174    183      1 ;    C83 - C81   
   174    186      1 ;    C83 - O12   
   175    178      1 ;    C82 - H42   
   175    179      1 ;    C82 - C84   
   175    184      1 ;    C82 - H41   
   176    177      1 ;    H46 - C80   
   176    183      1 ;    H46 - C81   
   176    186      1 ;    H46 - O12   
   177    181      1 ;    C80 - O17   
   177    182      1 ;    C80 - O18   
   177    184      1 ;    C80 - H41   
   177    185      1 ;    C80 - C79   
   178    180      1 ;    H42 - C85   
   178    183      1 ;    H42 - C81   
   179    186      1 ;    C84 - O12   
   180    184      1 ;    C85 - H41   
   180    185      1 ;    C85 - C79   
   181    183      1 ;    O17 - C81   
   182    183      1 ;    O18 - C81   
   184    186      1 ;    H41 - O12   

[ angles ]
;   ai     aj     ak    funct   theta         cth
     1      2      3      1    1.2733e+02    6.6191e+02 ;    O29 - C93    - O30   
     1      2      4      1    1.2311e+02    5.6902e+02 ;    O29 - C93    - C30   
     2      4      5      1    1.0968e+02    3.9497e+02 ;    C93 - C30    - H49   
     2      4      6      1    1.0968e+02    3.9497e+02 ;    C93 - C30    - H50   
     2      4      7      1    1.1053e+02    5.3388e+02 ;    C93 - C30    - C29   
     3      2      4      1    1.2311e+02    5.6902e+02 ;    O30 - C93    - C30   
     4      7      8      1    1.1005e+02    3.8828e+02 ;    C30 - C29    - H13   
     4      7      9      1    1.1005e+02    3.8828e+02 ;    C30 - C29    - H14   
     4      7     10      1    1.1063e+02    5.2886e+02 ;    C30 - C29    - C8    
     5      4      6      1    1.0835e+02    3.2970e+02 ;    H49 - C30    - H50   
     5      4      7      1    1.1005e+02    3.8828e+02 ;    H49 - C30    - C29   
     6      4      7      1    1.1005e+02    3.8828e+02 ;    H50 - C30    - C29   
     7     10     11      1    1.1005e+02    3.8828e+02 ;    C29 - C8     - H4    
     7     10     12      1    1.1461e+02    5.2300e+02 ;    C29 - C8     - C5    
     7     10     48      1    1.1461e+02    5.2300e+02 ;    C29 - C8     - C15   
     8      7      9      1    1.0835e+02    3.2970e+02 ;    H13 - C29    - H14   
     8      7     10      1    1.1005e+02    3.8828e+02 ;    H13 - C29    - C8    
     9      7     10      1    1.1005e+02    3.8828e+02 ;    H14 - C29    - C8    
    10     12     13      1    1.2063e+02    5.3388e+02 ;     C8 - C5     - C2    
    10     12     35      1    1.2063e+02    5.3388e+02 ;     C8 - C5     - C4    
    10     48     45      1    1.2063e+02    5.3388e+02 ;     C8 - C15    - C18   
    10     48     49      1    1.2063e+02    5.3388e+02 ;     C8 - C15    - C17   
    11     10     12      1    1.1015e+02    3.9330e+02 ;     H4 - C8     - C5    
    11     10     48      1    1.1015e+02    3.9330e+02 ;     H4 - C8     - C15   
    12     10     48      1    1.1247e+02    5.3220e+02 ;     C5 - C8     - C15   
    12     13     14      1    1.2001e+02    4.0585e+02 ;     C5 - C2     - H2    
    12     13     15      1    1.1997e+02    5.6233e+02 ;     C5 - C2     - C6    
    12     35     33      1    1.1997e+02    5.6233e+02 ;     C5 - C4     - C1    
    12     35     36      1    1.1920e+02    5.8409e+02 ;     C5 - C4     - O7    
    13     12     35      1    1.1997e+02    5.6233e+02 ;     C2 - C5     - C4    
    13     15     16      1    1.2063e+02    5.3388e+02 ;     C2 - C6     - C7    
    13     15     31      1    1.1997e+02    5.6233e+02 ;     C2 - C6     - C3    
    14     13     15      1    1.2001e+02    4.0585e+02 ;     H2 - C2     - C6    
    15     16     17      1    1.1015e+02    3.9330e+02 ;     C6 - C7     - H3    
    15     16     18      1    1.1247e+02    5.3220e+02 ;     C6 - C7     - C9    
    15     16     21      1    1.1461e+02    5.2300e+02 ;     C6 - C7     - C31   
    15     31     32      1    1.1920e+02    5.8409e+02 ;     C6 - C3     - O4    
    15     31     33      1    1.1997e+02    5.6233e+02 ;     C6 - C3     - C1    
    16     15     31      1    1.2063e+02    5.3388e+02 ;     C7 - C6     - C3    
    16     18     19      1    1.2063e+02    5.3388e+02 ;     C7 - C9     - C12   
    16     18    106      1    1.2063e+02    5.3388e+02 ;     C7 - C9     - C11   
    16     21     22      1    1.1005e+02    3.8828e+02 ;     C7 - C31    - H15   
    16     21     23      1    1.1063e+02    5.2886e+02 ;     C7 - C31    - C32   
    16     21     30      1    1.1005e+02    3.8828e+02 ;     C7 - C31    - H16   
    17     16     18      1    1.1015e+02    3.9330e+02 ;     H3 - C7     - C9    
    17     16     21      1    1.1005e+02    3.8828e+02 ;     H3 - C7     - C31   
    18     16     21      1    1.1461e+02    5.2300e+02 ;     C9 - C7     - C31   
    18     19     20      1    1.2001e+02    4.0585e+02 ;     C9 - C12    - H5    
    18     19    102      1    1.1997e+02    5.6233e+02 ;     C9 - C12    - C13   
    18    106    104      1    1.1997e+02    5.6233e+02 ;     C9 - C11    - C14   
    18    106    107      1    1.1920e+02    5.8409e+02 ;     C9 - C11    - O5    
    19     18    106      1    1.1997e+02    5.6233e+02 ;    C12 - C9     - C11   
    19    102     91      1    1.2063e+02    5.3388e+02 ;    C12 - C13    - C22   
    19    102    103      1    1.1997e+02    5.6233e+02 ;    C12 - C13    - C10   
    20     19    102      1    1.2001e+02    4.0585e+02 ;     H5 - C12    - C13   
    21     23     24      1    1.1005e+02    3.8828e+02 ;    C31 - C32    - H55   
    21     23     25      1    1.1005e+02    3.8828e+02 ;    C31 - C32    - H56   
    21     23     26      1    1.1053e+02    5.3388e+02 ;    C31 - C32    - C96   
    22     21     23      1    1.1005e+02    3.8828e+02 ;    H15 - C31    - C32   
    22     21     30      1    1.0835e+02    3.2970e+02 ;    H15 - C31    - H16   
    23     21     30      1    1.1005e+02    3.8828e+02 ;    C32 - C31    - H16   
    23     26     27      1    1.2311e+02    5.6902e+02 ;    C32 - C96    - O31   
    23     26     28      1    1.1220e+02    5.8409e+02 ;    C32 - C96    - O32   
    24     23     25      1    1.0835e+02    3.2970e+02 ;    H55 - C32    - H56   
    24     23     26      1    1.0968e+02    3.9497e+02 ;    H55 - C32    - C96   
    25     23     26      1    1.0968e+02    3.9497e+02 ;    H56 - C32    - C96   
    26     28     29      1    1.0737e+02    4.2844e+02 ;    C96 - O32    - H58   
    27     26     28      1    1.2288e+02    6.4768e+02 ;    O31 - C96    - O32   
    31     32    108      1    1.1760e+02    5.2216e+02 ;     C3 - O4     - C37   
    31     33     34      1    1.2001e+02    4.0585e+02 ;     C3 - C1     - H1    
    31     33     35      1    1.1997e+02    5.6233e+02 ;     C3 - C1     - C4    
    32     31     33      1    1.1920e+02    5.8409e+02 ;     O4 - C3     - C1    
    32    108    107      1    1.1024e+02    5.9999e+02 ;     O4 - C37    - O5    
    32    108    109      1    1.0858e+02    4.2509e+02 ;     O4 - C37    - H21   
    32    108    110      1    1.1051e+02    5.6651e+02 ;     O4 - C37    - C59   
    33     35     36      1    1.1920e+02    5.8409e+02 ;     C1 - C4     - O7    
    34     33     35      1    1.2001e+02    4.0585e+02 ;     H1 - C1     - C4    
    35     36     37      1    1.1760e+02    5.2216e+02 ;     C4 - O7     - C39   
    36     37     38      1    1.0858e+02    4.2509e+02 ;     O7 - C39    - H23   
    36     37     39      1    1.1051e+02    5.6651e+02 ;     O7 - C39    - C41   
    36     37     44      1    1.1024e+02    5.9999e+02 ;     O7 - C39    - O8    
    37     39     40      1    1.2063e+02    5.3388e+02 ;    C39 - C41    - C43   
    37     39     42      1    1.2063e+02    5.3388e+02 ;    C39 - C41    - C44   
    37     44     45      1    1.1760e+02    5.2216e+02 ;    C39 - O8     - C18   
    38     37     39      1    1.1083e+02    2.9255e+02 ;    H23 - C39    - C41   
    38     37     44      1    1.0858e+02    4.2509e+02 ;    H23 - C39    - O8    
    39     37     44      1    1.1051e+02    5.6651e+02 ;    C41 - C39    - O8    
    39     40     41      1    1.2001e+02    4.0585e+02 ;    C41 - C43    - H25   
    39     40    169      1    1.1997e+02    5.6233e+02 ;    C41 - C43    - C46   
    39     42     43      1    1.2001e+02    4.0585e+02 ;    C41 - C44    - H26   
    39     42    172      1    1.1997e+02    5.6233e+02 ;    C41 - C44    - C45   
    40     39     42      1    1.1997e+02    5.6233e+02 ;    C43 - C41    - C44   
    40    169    168      1    1.1920e+02    5.8409e+02 ;    C43 - C46    - O16   
    40    169    170      1    1.1997e+02    5.6233e+02 ;    C43 - C46    - C42   
    41     40    169      1    1.2001e+02    4.0585e+02 ;    H25 - C43    - C46   
    42    172    170      1    1.1997e+02    5.6233e+02 ;    C44 - C45    - C42   
    42    172    173      1    1.1920e+02    5.8409e+02 ;    C44 - C45    - O9    
    43     42    172      1    1.2001e+02    4.0585e+02 ;    H26 - C44    - C45   
    44     45     46      1    1.1920e+02    5.8409e+02 ;     O8 - C18    - C19   
    44     45     48      1    1.1920e+02    5.8409e+02 ;     O8 - C18    - C15   
    45     46     47      1    1.2001e+02    4.0585e+02 ;    C18 - C19    - H8    
    45     46     64      1    1.1997e+02    5.6233e+02 ;    C18 - C19    - C16   
    45     48     49      1    1.1997e+02    5.6233e+02 ;    C18 - C15    - C17   
    46     45     48      1    1.1997e+02    5.6233e+02 ;    C19 - C18    - C15   
    46     64     51      1    1.1997e+02    5.6233e+02 ;    C19 - C16    - C20   
    46     64     65      1    1.1920e+02    5.8409e+02 ;    C19 - C16    - O2    
    47     46     64      1    1.2001e+02    4.0585e+02 ;     H8 - C19    - C16   
    48     49     50      1    1.2001e+02    4.0585e+02 ;    C15 - C17    - H7    
    48     49     51      1    1.1997e+02    5.6233e+02 ;    C15 - C17    - C20   
    49     51     52      1    1.2063e+02    5.3388e+02 ;    C17 - C20    - C21   
    49     51     64      1    1.1997e+02    5.6233e+02 ;    C17 - C20    - C16   
    50     49     51      1    1.2001e+02    4.0585e+02 ;     H7 - C17    - C20   
    51     52     53      1    1.1015e+02    3.9330e+02 ;    C20 - C21    - H9    
    51     52     54      1    1.1461e+02    5.2300e+02 ;    C20 - C21    - C35   
    51     52     87      1    1.1247e+02    5.3220e+02 ;    C20 - C21    - C27   
    51     64     65      1    1.1920e+02    5.8409e+02 ;    C20 - C16    - O2    
    52     51     64      1    1.2063e+02    5.3388e+02 ;    C21 - C20    - C16   
    52     54     55      1    1.1005e+02    3.8828e+02 ;    C21 - C35    - H19   
    52     54     56      1    1.1063e+02    5.2886e+02 ;    C21 - C35    - C36   
    52     54     63      1    1.1005e+02    3.8828e+02 ;    C21 - C35    - H20   
    52     87     74      1    1.2063e+02    5.3388e+02 ;    C21 - C27    - C24   
    52     87     88      1    1.2063e+02    5.3388e+02 ;    C21 - C27    - C26   
    53     52     54      1    1.1005e+02    3.8828e+02 ;     H9 - C21    - C35   
    53     52     87      1    1.1015e+02    3.9330e+02 ;     H9 - C21    - C27   
    54     52     87      1    1.1461e+02    5.2300e+02 ;    C35 - C21    - C27   
    54     56     57      1    1.1005e+02    3.8828e+02 ;    C35 - C36    - H51   
    54     56     58      1    1.1005e+02    3.8828e+02 ;    C35 - C36    - H52   
    54     56     59      1    1.1053e+02    5.3388e+02 ;    C35 - C36    - C94   
    55     54     56      1    1.1005e+02    3.8828e+02 ;    H19 - C35    - C36   
    55     54     63      1    1.0835e+02    3.2970e+02 ;    H19 - C35    - H20   
    56     54     63      1    1.1005e+02    3.8828e+02 ;    C36 - C35    - H20   
    56     59     60      1    1.2311e+02    5.6902e+02 ;    C36 - C94    - O27   
    56     59     61      1    1.1220e+02    5.8409e+02 ;    C36 - C94    - O28   
    57     56     58      1    1.0835e+02    3.2970e+02 ;    H51 - C36    - H52   
    57     56     59      1    1.0968e+02    3.9497e+02 ;    H51 - C36    - C94   
    58     56     59      1    1.0968e+02    3.9497e+02 ;    H52 - C36    - C94   
    59     61     62      1    1.0737e+02    4.2844e+02 ;    C94 - O28    - H57   
    60     59     61      1    1.2288e+02    6.4768e+02 ;    O27 - C94    - O28   
    64     65     66      1    1.1760e+02    5.2216e+02 ;    C16 - O2     - C40   
    65     66     67      1    1.0858e+02    4.2509e+02 ;     O2 - C40    - H24   
    65     66     68      1    1.1051e+02    5.6651e+02 ;     O2 - C40    - C47   
    65     66     73      1    1.1024e+02    5.9999e+02 ;     O2 - C40    - O1    
    66     68     69      1    1.2063e+02    5.3388e+02 ;    C40 - C47    - C49   
    66     68     71      1    1.2063e+02    5.3388e+02 ;    C40 - C47    - C50   
    66     73     74      1    1.1760e+02    5.2216e+02 ;    C40 - O1     - C24   
    67     66     68      1    1.1083e+02    2.9255e+02 ;    H24 - C40    - C47   
    67     66     73      1    1.0858e+02    4.2509e+02 ;    H24 - C40    - O1    
    68     66     73      1    1.1051e+02    5.6651e+02 ;    C47 - C40    - O1    
    68     69     70      1    1.2001e+02    4.0585e+02 ;    C47 - C49    - H28   
    68     69    154      1    1.1997e+02    5.6233e+02 ;    C47 - C49    - C52   
    68     71     72      1    1.2001e+02    4.0585e+02 ;    C47 - C50    - H29   
    68     71    151      1    1.1997e+02    5.6233e+02 ;    C47 - C50    - C51   
    69     68     71      1    1.1997e+02    5.6233e+02 ;    C49 - C47    - C50   
    69    154    152      1    1.1997e+02    5.6233e+02 ;    C49 - C52    - C48   
    69    154    155      1    1.1920e+02    5.8409e+02 ;    C49 - C52    - O10   
    70     69    154      1    1.2001e+02    4.0585e+02 ;    H28 - C49    - C52   
    71    151    150      1    1.1920e+02    5.8409e+02 ;    C50 - C51    - O11   
    71    151    152      1    1.1997e+02    5.6233e+02 ;    C50 - C51    - C48   
    72     71    151      1    1.2001e+02    4.0585e+02 ;    H29 - C50    - C51   
    73     74     75      1    1.1920e+02    5.8409e+02 ;     O1 - C24    - C28   
    73     74     87      1    1.1920e+02    5.8409e+02 ;     O1 - C24    - C27   
    74     75     76      1    1.1997e+02    5.6233e+02 ;    C24 - C28    - C25   
    74     75     86      1    1.2001e+02    4.0585e+02 ;    C24 - C28    - H12   
    74     87     88      1    1.1997e+02    5.6233e+02 ;    C24 - C27    - C26   
    75     74     87      1    1.1997e+02    5.6233e+02 ;    C28 - C24    - C27   
    75     76     77      1    1.1920e+02    5.8409e+02 ;    C28 - C25    - O3    
    75     76     90      1    1.1997e+02    5.6233e+02 ;    C28 - C25    - C23   
    76     75     86      1    1.2001e+02    4.0585e+02 ;    C25 - C28    - H12   
    76     77     78      1    1.1760e+02    5.2216e+02 ;    C25 - O3     - C38   
    76     90     88      1    1.1997e+02    5.6233e+02 ;    C25 - C23    - C26   
    76     90     91      1    1.2063e+02    5.3388e+02 ;    C25 - C23    - C22   
    77     76     90      1    1.1920e+02    5.8409e+02 ;     O3 - C25    - C23   
    77     78     79      1    1.1024e+02    5.9999e+02 ;     O3 - C38    - O6    
    77     78     80      1    1.0858e+02    4.2509e+02 ;     O3 - C38    - H22   
    77     78     81      1    1.1051e+02    5.6651e+02 ;     O3 - C38    - C53   
    78     79    103      1    1.1760e+02    5.2216e+02 ;    C38 - O6     - C10   
    78     81     82      1    1.2063e+02    5.3388e+02 ;    C38 - C53    - C55   
    78     81     84      1    1.2063e+02    5.3388e+02 ;    C38 - C53    - C56   
    79     78     80      1    1.0858e+02    4.2509e+02 ;     O6 - C38    - H22   
    79     78     81      1    1.1051e+02    5.6651e+02 ;     O6 - C38    - C53   
    79    103    102      1    1.1920e+02    5.8409e+02 ;     O6 - C10    - C13   
    79    103    104      1    1.1920e+02    5.8409e+02 ;     O6 - C10    - C14   
    80     78     81      1    1.1083e+02    2.9255e+02 ;    H22 - C38    - C53   
    81     82     83      1    1.2001e+02    4.0585e+02 ;    C53 - C55    - H31   
    81     82    136      1    1.1997e+02    5.6233e+02 ;    C53 - C55    - C58   
    81     84     85      1    1.2001e+02    4.0585e+02 ;    C53 - C56    - H32   
    81     84    133      1    1.1997e+02    5.6233e+02 ;    C53 - C56    - C57   
    82     81     84      1    1.1997e+02    5.6233e+02 ;    C55 - C53    - C56   
    82    136    134      1    1.1997e+02    5.6233e+02 ;    C55 - C58    - C54   
    82    136    137      1    1.1920e+02    5.8409e+02 ;    C55 - C58    - O13   
    83     82    136      1    1.2001e+02    4.0585e+02 ;    H31 - C55    - C58   
    84    133    132      1    1.1920e+02    5.8409e+02 ;    C56 - C57    - O14   
    84    133    134      1    1.1997e+02    5.6233e+02 ;    C56 - C57    - C54   
    85     84    133      1    1.2001e+02    4.0585e+02 ;    H32 - C56    - C57   
    87     88     89      1    1.2001e+02    4.0585e+02 ;    C27 - C26    - H11   
    87     88     90      1    1.1997e+02    5.6233e+02 ;    C27 - C26    - C23   
    88     90     91      1    1.2063e+02    5.3388e+02 ;    C26 - C23    - C22   
    89     88     90      1    1.2001e+02    4.0585e+02 ;    H11 - C26    - C23   
    90     91     92      1    1.1015e+02    3.9330e+02 ;    C23 - C22    - H10   
    90     91     93      1    1.1461e+02    5.2300e+02 ;    C23 - C22    - C33   
    90     91    102      1    1.1247e+02    5.3220e+02 ;    C23 - C22    - C13   
    91     93     94      1    1.1005e+02    3.8828e+02 ;    C22 - C33    - H17   
    91     93     95      1    1.1063e+02    5.2886e+02 ;    C22 - C33    - C34   
    91     93    101      1    1.1005e+02    3.8828e+02 ;    C22 - C33    - H18   
    91    102    103      1    1.2063e+02    5.3388e+02 ;    C22 - C13    - C10   
    92     91     93      1    1.1005e+02    3.8828e+02 ;    H10 - C22    - C33   
    92     91    102      1    1.1015e+02    3.9330e+02 ;    H10 - C22    - C13   
    93     91    102      1    1.1461e+02    5.2300e+02 ;    C33 - C22    - C13   
    93     95     96      1    1.1005e+02    3.8828e+02 ;    C33 - C34    - H53   
    93     95     97      1    1.1005e+02    3.8828e+02 ;    C33 - C34    - H54   
    93     95     98      1    1.1053e+02    5.3388e+02 ;    C33 - C34    - C95   
    94     93     95      1    1.1005e+02    3.8828e+02 ;    H17 - C33    - C34   
    94     93    101      1    1.0835e+02    3.2970e+02 ;    H17 - C33    - H18   
    95     93    101      1    1.1005e+02    3.8828e+02 ;    C34 - C33    - H18   
    95     98     99      1    1.2311e+02    5.6902e+02 ;    C34 - C95    - O25   
    95     98    100      1    1.2311e+02    5.6902e+02 ;    C34 - C95    - O26   
    96     95     97      1    1.0835e+02    3.2970e+02 ;    H53 - C34    - H54   
    96     95     98      1    1.0968e+02    3.9497e+02 ;    H53 - C34    - C95   
    97     95     98      1    1.0968e+02    3.9497e+02 ;    H54 - C34    - C95   
    99     98    100      1    1.2733e+02    6.6191e+02 ;    O25 - C95    - O26   
   102    103    104      1    1.1997e+02    5.6233e+02 ;    C13 - C10    - C14   
   103    104    105      1    1.2001e+02    4.0585e+02 ;    C10 - C14    - H6    
   103    104    106      1    1.1997e+02    5.6233e+02 ;    C10 - C14    - C11   
   104    106    107      1    1.1920e+02    5.8409e+02 ;    C14 - C11    - O5    
   105    104    106      1    1.2001e+02    4.0585e+02 ;     H6 - C14    - C11   
   106    107    108      1    1.1760e+02    5.2216e+02 ;    C11 - O5     - C37   
   107    108    109      1    1.0858e+02    4.2509e+02 ;     O5 - C37    - H21   
   107    108    110      1    1.1051e+02    5.6651e+02 ;     O5 - C37    - C59   
   108    110    111      1    1.2063e+02    5.3388e+02 ;    C37 - C59    - C62   
   108    110    113      1    1.2063e+02    5.3388e+02 ;    C37 - C59    - C61   
   109    108    110      1    1.1083e+02    2.9255e+02 ;    H21 - C37    - C59   
   110    111    112      1    1.2001e+02    4.0585e+02 ;    C59 - C62    - H35   
   110    111    118      1    1.1997e+02    5.6233e+02 ;    C59 - C62    - C63   
   110    113    114      1    1.2001e+02    4.0585e+02 ;    C59 - C61    - H34   
   110    113    115      1    1.1997e+02    5.6233e+02 ;    C59 - C61    - C64   
   111    110    113      1    1.1997e+02    5.6233e+02 ;    C62 - C59    - C61   
   111    118    116      1    1.1997e+02    5.6233e+02 ;    C62 - C63    - C60   
   111    118    119      1    1.1920e+02    5.8409e+02 ;    C62 - C63    - O15   
   112    111    118      1    1.2001e+02    4.0585e+02 ;    H35 - C62    - C63   
   113    115    116      1    1.1997e+02    5.6233e+02 ;    C61 - C64    - C60   
   113    115    186      1    1.1920e+02    5.8409e+02 ;    C61 - C64    - O12   
   114    113    115      1    1.2001e+02    4.0585e+02 ;    H34 - C61    - C64   
   115    116    117      1    1.2001e+02    4.0585e+02 ;    C64 - C60    - H36   
   115    116    118      1    1.1997e+02    5.6233e+02 ;    C64 - C60    - C63   
   115    186    185      1    1.1896e+02    5.3220e+02 ;    C64 - O12    - C79   
   116    115    186      1    1.1920e+02    5.8409e+02 ;    C60 - C64    - O12   
   116    118    119      1    1.1920e+02    5.8409e+02 ;    C60 - C63    - O15   
   117    116    118      1    1.2001e+02    4.0585e+02 ;    H36 - C60    - C63   
   118    119    120      1    1.1896e+02    5.3220e+02 ;    C63 - O15    - C77   
   119    120    121      1    1.1920e+02    5.8409e+02 ;    O15 - C77    - C74   
   119    120    123      1    1.1920e+02    5.8409e+02 ;    O15 - C77    - C73   
   120    121    122      1    1.2001e+02    4.0585e+02 ;    C77 - C74    - H45   
   120    121    131      1    1.1997e+02    5.6233e+02 ;    C77 - C74    - C72   
   120    123    124      1    1.2001e+02    4.0585e+02 ;    C77 - C73    - H40   
   120    123    125      1    1.1997e+02    5.6233e+02 ;    C77 - C73    - C76   
   121    120    123      1    1.1997e+02    5.6233e+02 ;    C74 - C77    - C73   
   121    131    129      1    1.1997e+02    5.6233e+02 ;    C74 - C72    - C75   
   121    131    132      1    1.1920e+02    5.8409e+02 ;    C74 - C72    - O14   
   122    121    131      1    1.2001e+02    4.0585e+02 ;    H45 - C74    - C72   
   123    125    126      1    1.2014e+02    5.4057e+02 ;    C73 - C76    - C78   
   123    125    129      1    1.1997e+02    5.6233e+02 ;    C73 - C76    - C75   
   124    123    125      1    1.2001e+02    4.0585e+02 ;    H40 - C73    - C76   
   125    126    127      1    1.2344e+02    5.7488e+02 ;    C76 - C78    - O19   
   125    126    128      1    1.2344e+02    5.7488e+02 ;    C76 - C78    - O20   
   125    129    130      1    1.2001e+02    4.0585e+02 ;    C76 - C75    - H39   
   125    129    131      1    1.1997e+02    5.6233e+02 ;    C76 - C75    - C72   
   126    125    129      1    1.2014e+02    5.4057e+02 ;    C78 - C76    - C75   
   127    126    128      1    1.2733e+02    6.6191e+02 ;    O19 - C78    - O20   
   129    131    132      1    1.1920e+02    5.8409e+02 ;    C75 - C72    - O14   
   130    129    131      1    1.2001e+02    4.0585e+02 ;    H39 - C75    - C72   
   131    132    133      1    1.1896e+02    5.3220e+02 ;    C72 - O14    - C57   
   132    133    134      1    1.1920e+02    5.8409e+02 ;    O14 - C57    - C54   
   133    134    135      1    1.2001e+02    4.0585e+02 ;    C57 - C54    - H33   
   133    134    136      1    1.1997e+02    5.6233e+02 ;    C57 - C54    - C58   
   134    136    137      1    1.1920e+02    5.8409e+02 ;    C54 - C58    - O13   
   135    134    136      1    1.2001e+02    4.0585e+02 ;    H33 - C54    - C58   
   136    137    138      1    1.1896e+02    5.3220e+02 ;    C58 - O13    - C70   
   137    138    139      1    1.1920e+02    5.8409e+02 ;    O13 - C70    - C67   
   137    138    141      1    1.1920e+02    5.8409e+02 ;    O13 - C70    - C66   
   138    139    140      1    1.2001e+02    4.0585e+02 ;    C70 - C67    - H48   
   138    139    149      1    1.1997e+02    5.6233e+02 ;    C70 - C67    - C65   
   138    141    142      1    1.2001e+02    4.0585e+02 ;    C70 - C66    - H38   
   138    141    143      1    1.1997e+02    5.6233e+02 ;    C70 - C66    - C69   
   139    138    141      1    1.1997e+02    5.6233e+02 ;    C67 - C70    - C66   
   139    149    147      1    1.1997e+02    5.6233e+02 ;    C67 - C65    - C68   
   139    149    150      1    1.1920e+02    5.8409e+02 ;    C67 - C65    - O11   
   140    139    149      1    1.2001e+02    4.0585e+02 ;    H48 - C67    - C65   
   141    143    144      1    1.2014e+02    5.4057e+02 ;    C66 - C69    - C71   
   141    143    147      1    1.1997e+02    5.6233e+02 ;    C66 - C69    - C68   
   142    141    143      1    1.2001e+02    4.0585e+02 ;    H38 - C66    - C69   
   143    144    145      1    1.2344e+02    5.7488e+02 ;    C69 - C71    - O21   
   143    144    146      1    1.2344e+02    5.7488e+02 ;    C69 - C71    - O22   
   143    147    148      1    1.2001e+02    4.0585e+02 ;    C69 - C68    - H37   
   143    147    149      1    1.1997e+02    5.6233e+02 ;    C69 - C68    - C65   
   144    143    147      1    1.2014e+02    5.4057e+02 ;    C71 - C69    - C68   
   145    144    146      1    1.2733e+02    6.6191e+02 ;    O21 - C71    - O22   
   147    149    150      1    1.1920e+02    5.8409e+02 ;    C68 - C65    - O11   
   148    147    149      1    1.2001e+02    4.0585e+02 ;    H37 - C68    - C65   
   149    150    151      1    1.1896e+02    5.3220e+02 ;    C65 - O11    - C51   
   150    151    152      1    1.1920e+02    5.8409e+02 ;    O11 - C51    - C48   
   151    152    153      1    1.2001e+02    4.0585e+02 ;    C51 - C48    - H30   
   151    152    154      1    1.1997e+02    5.6233e+02 ;    C51 - C48    - C52   
   152    154    155      1    1.1920e+02    5.8409e+02 ;    C48 - C52    - O10   
   153    152    154      1    1.2001e+02    4.0585e+02 ;    H30 - C48    - C52   
   154    155    156      1    1.1896e+02    5.3220e+02 ;    C52 - O10    - C91   
   155    156    157      1    1.1920e+02    5.8409e+02 ;    O10 - C91    - C88   
   155    156    159      1    1.1920e+02    5.8409e+02 ;    O10 - C91    - C87   
   156    157    158      1    1.2001e+02    4.0585e+02 ;    C91 - C88    - H47   
   156    157    167      1    1.1997e+02    5.6233e+02 ;    C91 - C88    - C86   
   156    159    160      1    1.2001e+02    4.0585e+02 ;    C91 - C87    - H44   
   156    159    161      1    1.1997e+02    5.6233e+02 ;    C91 - C87    - C90   
   157    156    159      1    1.1997e+02    5.6233e+02 ;    C88 - C91    - C87   
   157    167    165      1    1.1997e+02    5.6233e+02 ;    C88 - C86    - C89   
   157    167    168      1    1.1920e+02    5.8409e+02 ;    C88 - C86    - O16   
   158    157    167      1    1.2001e+02    4.0585e+02 ;    H47 - C88    - C86   
   159    161    162      1    1.2014e+02    5.4057e+02 ;    C87 - C90    - C92   
   159    161    165      1    1.1997e+02    5.6233e+02 ;    C87 - C90    - C89   
   160    159    161      1    1.2001e+02    4.0585e+02 ;    H44 - C87    - C90   
   161    162    163      1    1.2344e+02    5.7488e+02 ;    C90 - C92    - O23   
   161    162    164      1    1.2344e+02    5.7488e+02 ;    C90 - C92    - O24   
   161    165    166      1    1.2001e+02    4.0585e+02 ;    C90 - C89    - H43   
   161    165    167      1    1.1997e+02    5.6233e+02 ;    C90 - C89    - C86   
   162    161    165      1    1.2014e+02    5.4057e+02 ;    C92 - C90    - C89   
   163    162    164      1    1.2733e+02    6.6191e+02 ;    O23 - C92    - O24   
   165    167    168      1    1.1920e+02    5.8409e+02 ;    C89 - C86    - O16   
   166    165    167      1    1.2001e+02    4.0585e+02 ;    H43 - C89    - C86   
   167    168    169      1    1.1896e+02    5.3220e+02 ;    C86 - O16    - C46   
   168    169    170      1    1.1920e+02    5.8409e+02 ;    O16 - C46    - C42   
   169    170    171      1    1.2001e+02    4.0585e+02 ;    C46 - C42    - H27   
   169    170    172      1    1.1997e+02    5.6233e+02 ;    C46 - C42    - C45   
   170    172    173      1    1.1920e+02    5.8409e+02 ;    C42 - C45    - O9    
   171    170    172      1    1.2001e+02    4.0585e+02 ;    H27 - C42    - C45   
   172    173    174      1    1.1896e+02    5.3220e+02 ;    C45 - O9     - C83   
   173    174    175      1    1.1920e+02    5.8409e+02 ;     O9 - C83    - C82   
   173    174    177      1    1.1920e+02    5.8409e+02 ;     O9 - C83    - C80   
   174    175    176      1    1.2001e+02    4.0585e+02 ;    C83 - C82    - H46   
   174    175    185      1    1.1997e+02    5.6233e+02 ;    C83 - C82    - C79   
   174    177    178      1    1.2001e+02    4.0585e+02 ;    C83 - C80    - H42   
   174    177    179      1    1.1997e+02    5.6233e+02 ;    C83 - C80    - C84   
   175    174    177      1    1.1997e+02    5.6233e+02 ;    C82 - C83    - C80   
   175    185    183      1    1.1997e+02    5.6233e+02 ;    C82 - C79    - C81   
   175    185    186      1    1.1920e+02    5.8409e+02 ;    C82 - C79    - O12   
   176    175    185      1    1.2001e+02    4.0585e+02 ;    H46 - C82    - C79   
   177    179    180      1    1.2014e+02    5.4057e+02 ;    C80 - C84    - C85   
   177    179    183      1    1.1997e+02    5.6233e+02 ;    C80 - C84    - C81   
   178    177    179      1    1.2001e+02    4.0585e+02 ;    H42 - C80    - C84   
   179    180    181      1    1.2344e+02    5.7488e+02 ;    C84 - C85    - O17   
   179    180    182      1    1.2344e+02    5.7488e+02 ;    C84 - C85    - O18   
   179    183    184      1    1.2001e+02    4.0585e+02 ;    C84 - C81    - H41   
   179    183    185      1    1.1997e+02    5.6233e+02 ;    C84 - C81    - C79   
   180    179    183      1    1.2014e+02    5.4057e+02 ;    C85 - C84    - C81   
   181    180    182      1    1.2733e+02    6.6191e+02 ;    O17 - C85    - O18   
   183    185    186      1    1.1920e+02    5.8409e+02 ;    C81 - C79    - O12   
   184    183    185      1    1.2001e+02    4.0585e+02 ;    H41 - C81    - C79   

[ dihedrals ] ; propers
; treated as RBs in GROMACS to use combine multiple AMBER torsions per quartet
;    i      j      k      l   func    C0         C1         C2         C3         C4         C5
     1      2      4      5      3    3.68192   -4.35136    0.00000    1.33888    0.00000    0.00000 ;    O29-   C93-   C30-   H49
     1      2      4      6      3    3.68192   -4.35136    0.00000    1.33888    0.00000    0.00000 ;    O29-   C93-   C30-   H50
     1      2      4      7      3    0.00000    0.00000    0.00000    0.00000    0.00000    0.00000 ;    O29-   C93-   C30-   C29
     2      4      7      8      3    0.65084    1.95253    0.00000   -2.60338    0.00000    0.00000 ;    C93-   C30-   C29-   H13
     2      4      7      9      3    0.65084    1.95253    0.00000   -2.60338    0.00000    0.00000 ;    C93-   C30-   C29-   H14
     2      4      7     10      3    0.65084    1.95253    0.00000   -2.60338    0.00000    0.00000 ;    C93-   C30-   C29-    C8
     3      2      4      5      3    3.68192   -4.35136    0.00000    1.33888    0.00000    0.00000 ;    O30-   C93-   C30-   H49
     3      2      4      6      3    3.68192   -4.35136    0.00000    1.33888    0.00000    0.00000 ;    O30-   C93-   C30-   H50
     3      2      4      7      3    0.00000    0.00000    0.00000    0.00000    0.00000    0.00000 ;    O30-   C93-   C30-   C29
     4      7     10     11      3    0.66944    2.00832    0.00000   -2.67776    0.00000    0.00000 ;    C30-   C29-    C8-    H4
     4      7     10     12      3    0.65084    1.95253    0.00000   -2.60338    0.00000    0.00000 ;    C30-   C29-    C8-    C5
     4      7     10     48      3    0.65084    1.95253    0.00000   -2.60338    0.00000    0.00000 ;    C30-   C29-    C8-   C15
     5      4      7      8      3    0.62760    1.88280    0.00000   -2.51040    0.00000    0.00000 ;    H49-   C30-   C29-   H13
     5      4      7      9      3    0.62760    1.88280    0.00000   -2.51040    0.00000    0.00000 ;    H49-   C30-   C29-   H14
     5      4      7     10      3    0.66944    2.00832    0.00000   -2.67776    0.00000    0.00000 ;    H49-   C30-   C29-    C8
     6      4      7      8      3    0.62760    1.88280    0.00000   -2.51040    0.00000    0.00000 ;    H50-   C30-   C29-   H13
     6      4      7      9      3    0.62760    1.88280    0.00000   -2.51040    0.00000    0.00000 ;    H50-   C30-   C29-   H14
     6      4      7     10      3    0.66944    2.00832    0.00000   -2.67776    0.00000    0.00000 ;    H50-   C30-   C29-    C8
     7     10     12     13      3    0.00000    0.00000    0.00000    0.00000    0.00000    0.00000 ;    C29-    C8-    C5-    C2
     7     10     12     35      3    0.00000    0.00000    0.00000    0.00000    0.00000    0.00000 ;    C29-    C8-    C5-    C4
     7     10     48     45      3    0.00000    0.00000    0.00000    0.00000    0.00000    0.00000 ;    C29-    C8-   C15-   C18
     7     10     48     49      3    0.00000    0.00000    0.00000    0.00000    0.00000    0.00000 ;    C29-    C8-   C15-   C17
     8      7     10     11      3    0.62760    1.88280    0.00000   -2.51040    0.00000    0.00000 ;    H13-   C29-    C8-    H4
     8      7     10     12      3    0.65084    1.95253    0.00000   -2.60338    0.00000    0.00000 ;    H13-   C29-    C8-    C5
     8      7     10     48      3    0.65084    1.95253    0.00000   -2.60338    0.00000    0.00000 ;    H13-   C29-    C8-   C15
     9      7     10     11      3    0.62760    1.88280    0.00000   -2.51040    0.00000    0.00000 ;    H14-   C29-    C8-    H4
     9      7     10     12      3    0.65084    1.95253    0.00000   -2.60338    0.00000    0.00000 ;    H14-   C29-    C8-    C5
     9      7     10     48      3    0.65084    1.95253    0.00000   -2.60338    0.00000    0.00000 ;    H14-   C29-    C8-   C15
    10     12     13     14      3   30.33400    0.00000  -30.33400    0.00000    0.00000    0.00000 ;     C8-    C5-    C2-    H2
    10     12     13     15      3   30.33400    0.00000  -30.33400    0.00000    0.00000    0.00000 ;     C8-    C5-    C2-    C6
    10     12     35     33      3   30.33400    0.00000  -30.33400    0.00000    0.00000    0.00000 ;     C8-    C5-    C4-    C1
    10     12     35     36      3   30.33400    0.00000  -30.33400    0.00000    0.00000    0.00000 ;     C8-    C5-    C4-    O7
    10     48     45     44      3   30.33400    0.00000  -30.33400    0.00000    0.00000    0.00000 ;     C8-   C15-   C18-    O8
    10     48     45     46      3   30.33400    0.00000  -30.33400    0.00000    0.00000    0.00000 ;     C8-   C15-   C18-   C19
    10     48     49     50      3   30.33400    0.00000  -30.33400    0.00000    0.00000    0.00000 ;     C8-   C15-   C17-    H7
    10     48     49     51      3   30.33400    0.00000  -30.33400    0.00000    0.00000    0.00000 ;     C8-   C15-   C17-   C20
    11     10     12     13      3    0.00000    0.00000    0.00000    0.00000    0.00000    0.00000 ;     H4-    C8-    C5-    C2
    11     10     12     35      3    0.00000    0.00000    0.00000    0.00000    0.00000    0.00000 ;     H4-    C8-    C5-    C4
    11     10     48     45      3    0.00000    0.00000    0.00000    0.00000    0.00000    0.00000 ;     H4-    C8-   C15-   C18
    11     10     48     49      3    0.00000    0.00000    0.00000    0.00000    0.00000    0.00000 ;     H4-    C8-   C15-   C17
    12     10     48     45      3    0.00000    0.00000    0.00000    0.00000    0.00000    0.00000 ;     C5-    C8-   C15-   C18
    12     10     48     49      3    0.00000    0.00000    0.00000    0.00000    0.00000    0.00000 ;     C5-    C8-   C15-   C17
    12     13     15     16      3   30.33400    0.00000  -30.33400    0.00000    0.00000    0.00000 ;     C5-    C2-    C6-    C7
    12     13     15     31      3   30.33400    0.00000  -30.33400    0.00000    0.00000    0.00000 ;     C5-    C2-    C6-    C3
    12     35     33     31      3   30.33400    0.00000  -30.33400    0.00000    0.00000    0.00000 ;     C5-    C4-    C1-    C3
    12     35     33     34      3   30.33400    0.00000  -30.33400    0.00000    0.00000    0.00000 ;     C5-    C4-    C1-    H1
    12     35     36     37      3    7.53120    0.00000   -7.53120    0.00000    0.00000    0.00000 ;     C5-    C4-    O7-   C39
    13     12     10     48      3    0.00000    0.00000    0.00000    0.00000    0.00000    0.00000 ;     C2-    C5-    C8-   C15
    13     12     35     33      3   30.33400    0.00000  -30.33400    0.00000    0.00000    0.00000 ;     C2-    C5-    C4-    C1
    13     12     35     36      3   30.33400    0.00000  -30.33400    0.00000    0.00000    0.00000 ;     C2-    C5-    C4-    O7
    13     15     16     17      3    0.00000    0.00000    0.00000    0.00000    0.00000    0.00000 ;     C2-    C6-    C7-    H3
    13     15     16     18      3    0.00000    0.00000    0.00000    0.00000    0.00000    0.00000 ;     C2-    C6-    C7-    C9
    13     15     16     21      3    0.00000    0.00000    0.00000    0.00000    0.00000    0.00000 ;     C2-    C6-    C7-   C31
    13     15     31     32      3   30.33400    0.00000  -30.33400    0.00000    0.00000    0.00000 ;     C2-    C6-    C3-    O4
    13     15     31     33      3   30.33400    0.00000  -30.33400    0.00000    0.00000    0.00000 ;     C2-    C6-    C3-    C1
    14     13     12     35      3   30.33400    0.00000  -30.33400    0.00000    0.00000    0.00000 ;     H2-    C2-    C5-    C4
    14     13     15     16      3   30.33400    0.00000  -30.33400    0.00000    0.00000    0.00000 ;     H2-    C2-    C6-    C7
    14     13     15     31      3   30.33400    0.00000  -30.33400    0.00000    0.00000    0.00000 ;     H2-    C2-    C6-    C3
    15     13     12     35      3   30.33400    0.00000  -30.33400    0.00000    0.00000    0.00000 ;     C6-    C2-    C5-    C4
    15     16     18     19      3    0.00000    0.00000    0.00000    0.00000    0.00000    0.00000 ;     C6-    C7-    C9-   C12
    15     16     18    106      3    0.00000    0.00000    0.00000    0.00000    0.00000    0.00000 ;     C6-    C7-    C9-   C11
    15     16     21     22      3    0.65084    1.95253    0.00000   -2.60338    0.00000    0.00000 ;     C6-    C7-   C31-   H15
    15     16     21     23      3    0.65084    1.95253    0.00000   -2.60338    0.00000    0.00000 ;     C6-    C7-   C31-   C32
    15     16     21     30      3    0.65084    1.95253    0.00000   -2.60338    0.00000    0.00000 ;     C6-    C7-   C31-   H16
    15     31     32    108      3    7.53120    0.00000   -7.53120    0.00000    0.00000    0.00000 ;     C6-    C3-    O4-   C37
    15     31     33     34      3   30.33400    0.00000  -30.33400    0.00000    0.00000    0.00000 ;     C6-    C3-    C1-    H1
    15     31     33     35      3   30.33400    0.00000  -30.33400    0.00000    0.00000    0.00000 ;     C6-    C3-    C1-    C4
    16     15     31     32      3   30.33400    0.00000  -30.33400    0.00000    0.00000    0.00000 ;     C7-    C6-    C3-    O4
    16     15     31     33      3   30.33400    0.00000  -30.33400    0.00000    0.00000    0.00000 ;     C7-    C6-    C3-    C1
    16     18     19     20      3   30.33400    0.00000  -30.33400    0.00000    0.00000    0.00000 ;     C7-    C9-   C12-    H5
    16     18     19    102      3   30.33400    0.00000  -30.33400    0.00000    0.00000    0.00000 ;     C7-    C9-   C12-   C13
    16     18    106    104      3   30.33400    0.00000  -30.33400    0.00000    0.00000    0.00000 ;     C7-    C9-   C11-   C14
    16     18    106    107      3   30.33400    0.00000  -30.33400    0.00000    0.00000    0.00000 ;     C7-    C9-   C11-    O5
    16     21     23     24      3    0.66944    2.00832    0.00000   -2.67776    0.00000    0.00000 ;     C7-   C31-   C32-   H55
    16     21     23     25      3    0.66944    2.00832    0.00000   -2.67776    0.00000    0.00000 ;     C7-   C31-   C32-   H56
    16     21     23     26      3    0.65084    1.95253    0.00000   -2.60338    0.00000    0.00000 ;     C7-   C31-   C32-   C96
    17     16     15     31      3    0.00000    0.00000    0.00000    0.00000    0.00000    0.00000 ;     H3-    C7-    C6-    C3
    17     16     18     19      3    0.00000    0.00000    0.00000    0.00000    0.00000    0.00000 ;     H3-    C7-    C9-   C12
    17     16     18    106      3    0.00000    0.00000    0.00000    0.00000    0.00000    0.00000 ;     H3-    C7-    C9-   C11
    17     16     21     22      3    0.62760    1.88280    0.00000   -2.51040    0.00000    0.00000 ;     H3-    C7-   C31-   H15
    17     16     21     23      3    0.66944    2.00832    0.00000   -2.67776    0.00000    0.00000 ;     H3-    C7-   C31-   C32
    17     16     21     30      3    0.62760    1.88280    0.00000   -2.51040    0.00000    0.00000 ;     H3-    C7-   C31-   H16
    18     16     15     31      3    0.00000    0.00000    0.00000    0.00000    0.00000    0.00000 ;     C9-    C7-    C6-    C3
    18     16     21     22      3    0.65084    1.95253    0.00000   -2.60338    0.00000    0.00000 ;     C9-    C7-   C31-   H15
    18     16     21     23      3    0.65084    1.95253    0.00000   -2.60338    0.00000    0.00000 ;     C9-    C7-   C31-   C32
    18     16     21     30      3    0.65084    1.95253    0.00000   -2.60338    0.00000    0.00000 ;     C9-    C7-   C31-   H16
    18     19    102     91      3   30.33400    0.00000  -30.33400    0.00000    0.00000    0.00000 ;     C9-   C12-   C13-   C22
    18     19    102    103      3   30.33400    0.00000  -30.33400    0.00000    0.00000    0.00000 ;     C9-   C12-   C13-   C10
    18    106    104    103      3   30.33400    0.00000  -30.33400    0.00000    0.00000    0.00000 ;     C9-   C11-   C14-   C10
    18    106    104    105      3   30.33400    0.00000  -30.33400    0.00000    0.00000    0.00000 ;     C9-   C11-   C14-    H6
    18    106    107    108      3    7.53120    0.00000   -7.53120    0.00000    0.00000    0.00000 ;     C9-   C11-    O5-   C37
    19     18     16     21      3    0.00000    0.00000    0.00000    0.00000    0.00000    0.00000 ;    C12-    C9-    C7-   C31
    19     18    106    104      3   30.33400    0.00000  -30.33400    0.00000    0.00000    0.00000 ;    C12-    C9-   C11-   C14
    19     18    106    107      3   30.33400    0.00000  -30.33400    0.00000    0.00000    0.00000 ;    C12-    C9-   C11-    O5
    19    102     91     90      3    0.00000    0.00000    0.00000    0.00000    0.00000    0.00000 ;    C12-   C13-   C22-   C23
    19    102     91     92      3    0.00000    0.00000    0.00000    0.00000    0.00000    0.00000 ;    C12-   C13-   C22-   H10
    19    102     91     93      3    0.00000    0.00000    0.00000    0.00000    0.00000    0.00000 ;    C12-   C13-   C22-   C33
    19    102    103     79      3   30.33400    0.00000  -30.33400    0.00000    0.00000    0.00000 ;    C12-   C13-   C10-    O6
    19    102    103    104      3   30.33400    0.00000  -30.33400    0.00000    0.00000    0.00000 ;    C12-   C13-   C10-   C14
    20     19     18    106      3   30.33400    0.00000  -30.33400    0.00000    0.00000    0.00000 ;     H5-   C12-    C9-   C11
    20     19    102     91      3   30.33400    0.00000  -30.33400    0.00000    0.00000    0.00000 ;     H5-   C12-   C13-   C22
    20     19    102    103      3   30.33400    0.00000  -30.33400    0.00000    0.00000    0.00000 ;     H5-   C12-   C13-   C10
    21     16     15     31      3    0.00000    0.00000    0.00000    0.00000    0.00000    0.00000 ;    C31-    C7-    C6-    C3
    21     16     18    106      3    0.00000    0.00000    0.00000    0.00000    0.00000    0.00000 ;    C31-    C7-    C9-   C11
    21     23     26     27      3    0.00000    0.00000    0.00000    0.00000    0.00000    0.00000 ;    C31-   C32-   C96-   O31
    21     23     26     28      3    0.00000    0.00000    0.00000    0.00000    0.00000    0.00000 ;    C31-   C32-   C96-   O32
    22     21     23     24      3    0.62760    1.88280    0.00000   -2.51040    0.00000    0.00000 ;    H15-   C31-   C32-   H55
    22     21     23     25      3    0.62760    1.88280    0.00000   -2.51040    0.00000    0.00000 ;    H15-   C31-   C32-   H56
    22     21     23     26      3    0.65084    1.95253    0.00000   -2.60338    0.00000    0.00000 ;    H15-   C31-   C32-   C96
    23     26     28     29      3   19.24640    0.00000  -19.24640    0.00000    0.00000    0.00000 ;    C32-   C96-   O32-   H58
    24     23     21     30      3    0.62760    1.88280    0.00000   -2.51040    0.00000    0.00000 ;    H55-   C32-   C31-   H16
    24     23     26     27      3    3.68192   -4.35136    0.00000    1.33888    0.00000    0.00000 ;    H55-   C32-   C96-   O31
    24     23     26     28      3    0.00000    0.00000    0.00000    0.00000    0.00000    0.00000 ;    H55-   C32-   C96-   O32
    25     23     21     30      3    0.62760    1.88280    0.00000   -2.51040    0.00000    0.00000 ;    H56-   C32-   C31-   H16
    25     23     26     27      3    3.68192   -4.35136    0.00000    1.33888    0.00000    0.00000 ;    H56-   C32-   C96-   O31
    25     23     26     28      3    0.00000    0.00000    0.00000    0.00000    0.00000    0.00000 ;    H56-   C32-   C96-   O32
    26     23     21     30      3    0.65084    1.95253    0.00000   -2.60338    0.00000    0.00000 ;    C96-   C32-   C31-   H16
    27     26     28     29      3   27.19600   -7.94960  -19.24640    0.00000    0.00000    0.00000 ;    O31-   C96-   O32-   H58
    31     32    108    107      3    1.60387    4.81160    0.00000   -6.41547    0.00000    0.00000 ;     C3-    O4-   C37-    O5
    31     32    108    109      3    1.60387    4.81160    0.00000   -6.41547    0.00000    0.00000 ;     C3-    O4-   C37-   H21
    31     32    108    110      3    1.60387    4.81160    0.00000   -6.41547    0.00000    0.00000 ;     C3-    O4-   C37-   C59
    31     33     35     36      3   30.33400    0.00000  -30.33400    0.00000    0.00000    0.00000 ;     C3-    C1-    C4-    O7
    32     31     33     34      3   30.33400    0.00000  -30.33400    0.00000    0.00000    0.00000 ;     O4-    C3-    C1-    H1
    32     31     33     35      3   30.33400    0.00000  -30.33400    0.00000    0.00000    0.00000 ;     O4-    C3-    C1-    C4
    32    108    107    106      3    1.60387    4.81160    0.00000   -6.41547    0.00000    0.00000 ;     O4-   C37-    O5-   C11
    32    108    110    111      3    0.00000    0.00000    0.00000    0.00000    0.00000    0.00000 ;     O4-   C37-   C59-   C62
    32    108    110    113      3    0.00000    0.00000    0.00000    0.00000    0.00000    0.00000 ;     O4-   C37-   C59-   C61
    33     31     32    108      3    7.53120    0.00000   -7.53120    0.00000    0.00000    0.00000 ;     C1-    C3-    O4-   C37
    33     35     36     37      3    7.53120    0.00000   -7.53120    0.00000    0.00000    0.00000 ;     C1-    C4-    O7-   C39
    34     33     35     36      3   30.33400    0.00000  -30.33400    0.00000    0.00000    0.00000 ;     H1-    C1-    C4-    O7
    35     12     10     48      3    0.00000    0.00000    0.00000    0.00000    0.00000    0.00000 ;     C4-    C5-    C8-   C15
    35     36     37     38      3    1.60387    4.81160    0.00000   -6.41547    0.00000    0.00000 ;     C4-    O7-   C39-   H23
    35     36     37     39      3    1.60387    4.81160    0.00000   -6.41547    0.00000    0.00000 ;     C4-    O7-   C39-   C41
    35     36     37     44      3    1.60387    4.81160    0.00000   -6.41547    0.00000    0.00000 ;     C4-    O7-   C39-    O8
    36     37     39     40      3    0.00000    0.00000    0.00000    0.00000    0.00000    0.00000 ;     O7-   C39-   C41-   C43
    36     37     39     42      3    0.00000    0.00000    0.00000    0.00000    0.00000    0.00000 ;     O7-   C39-   C41-   C44
    36     37     44     45      3    1.60387    4.81160    0.00000   -6.41547    0.00000    0.00000 ;     O7-   C39-    O8-   C18
    37     39     40     41      3   30.33400    0.00000  -30.33400    0.00000    0.00000    0.00000 ;    C39-   C41-   C43-   H25
    37     39     40    169      3   30.33400    0.00000  -30.33400    0.00000    0.00000    0.00000 ;    C39-   C41-   C43-   C46
    37     39     42     43      3   30.33400    0.00000  -30.33400    0.00000    0.00000    0.00000 ;    C39-   C41-   C44-   H26
    37     39     42    172      3   30.33400    0.00000  -30.33400    0.00000    0.00000    0.00000 ;    C39-   C41-   C44-   C45
    37     44     45     46      3    7.53120    0.00000   -7.53120    0.00000    0.00000    0.00000 ;    C39-    O8-   C18-   C19
    37     44     45     48      3    7.53120    0.00000   -7.53120    0.00000    0.00000    0.00000 ;    C39-    O8-   C18-   C15
    38     37     39     40      3    0.00000    0.00000    0.00000    0.00000    0.00000    0.00000 ;    H23-   C39-   C41-   C43
    38     37     39     42      3    0.00000    0.00000    0.00000    0.00000    0.00000    0.00000 ;    H23-   C39-   C41-   C44
    38     37     44     45      3    1.60387    4.81160    0.00000   -6.41547    0.00000    0.00000 ;    H23-   C39-    O8-   C18
    39     37     44     45      3    1.60387    4.81160    0.00000   -6.41547    0.00000    0.00000 ;    C41-   C39-    O8-   C18
    39     40    169    168      3   30.33400    0.00000  -30.33400    0.00000    0.00000    0.00000 ;    C41-   C43-   C46-   O16
    39     40    169    170      3   30.33400    0.00000  -30.33400    0.00000    0.00000    0.00000 ;    C41-   C43-   C46-   C42
    39     42    172    170      3   30.33400    0.00000  -30.33400    0.00000    0.00000    0.00000 ;    C41-   C44-   C45-   C42
    39     42    172    173      3   30.33400    0.00000  -30.33400    0.00000    0.00000    0.00000 ;    C41-   C44-   C45-    O9
    40     39     37     44      3    0.00000    0.00000    0.00000    0.00000    0.00000    0.00000 ;    C43-   C41-   C39-    O8
    40     39     42     43      3   30.33400    0.00000  -30.33400    0.00000    0.00000    0.00000 ;    C43-   C41-   C44-   H26
    40     39     42    172      3   30.33400    0.00000  -30.33400    0.00000    0.00000    0.00000 ;    C43-   C41-   C44-   C45
    40    169    168    167      3    7.53120    0.00000   -7.53120    0.00000    0.00000    0.00000 ;    C43-   C46-   O16-   C86
    40    169    170    171      3   30.33400    0.00000  -30.33400    0.00000    0.00000    0.00000 ;    C43-   C46-   C42-   H27
    40    169    170    172      3   30.33400    0.00000  -30.33400    0.00000    0.00000    0.00000 ;    C43-   C46-   C42-   C45
    41     40     39     42      3   30.33400    0.00000  -30.33400    0.00000    0.00000    0.00000 ;    H25-   C43-   C41-   C44
    41     40    169    168      3   30.33400    0.00000  -30.33400    0.00000    0.00000    0.00000 ;    H25-   C43-   C46-   O16
    41     40    169    170      3   30.33400    0.00000  -30.33400    0.00000    0.00000    0.00000 ;    H25-   C43-   C46-   C42
    42     39     37     44      3    0.00000    0.00000    0.00000    0.00000    0.00000    0.00000 ;    C44-   C41-   C39-    O8
    42     39     40    169      3   30.33400    0.00000  -30.33400    0.00000    0.00000    0.00000 ;    C44-   C41-   C43-   C46
    42    172    170    169      3   30.33400    0.00000  -30.33400    0.00000    0.00000    0.00000 ;    C44-   C45-   C42-   C46
    42    172    170    171      3   30.33400    0.00000  -30.33400    0.00000    0.00000    0.00000 ;    C44-   C45-   C42-   H27
    42    172    173    174      3    7.53120    0.00000   -7.53120    0.00000    0.00000    0.00000 ;    C44-   C45-    O9-   C83
    43     42    172    170      3   30.33400    0.00000  -30.33400    0.00000    0.00000    0.00000 ;    H26-   C44-   C45-   C42
    43     42    172    173      3   30.33400    0.00000  -30.33400    0.00000    0.00000    0.00000 ;    H26-   C44-   C45-    O9
    44     45     46     47      3   30.33400    0.00000  -30.33400    0.00000    0.00000    0.00000 ;     O8-   C18-   C19-    H8
    44     45     46     64      3   30.33400    0.00000  -30.33400    0.00000    0.00000    0.00000 ;     O8-   C18-   C19-   C16
    44     45     48     49      3   30.33400    0.00000  -30.33400    0.00000    0.00000    0.00000 ;     O8-   C18-   C15-   C17
    45     46     64     51      3   30.33400    0.00000  -30.33400    0.00000    0.00000    0.00000 ;    C18-   C19-   C16-   C20
    45     46     64     65      3   30.33400    0.00000  -30.33400    0.00000    0.00000    0.00000 ;    C18-   C19-   C16-    O2
    45     48     49     50      3   30.33400    0.00000  -30.33400    0.00000    0.00000    0.00000 ;    C18-   C15-   C17-    H7
    45     48     49     51      3   30.33400    0.00000  -30.33400    0.00000    0.00000    0.00000 ;    C18-   C15-   C17-   C20
    46     45     48     49      3   30.33400    0.00000  -30.33400    0.00000    0.00000    0.00000 ;    C19-   C18-   C15-   C17
    46     64     51     49      3   30.33400    0.00000  -30.33400    0.00000    0.00000    0.00000 ;    C19-   C16-   C20-   C17
    46     64     51     52      3   30.33400    0.00000  -30.33400    0.00000    0.00000    0.00000 ;    C19-   C16-   C20-   C21
    46     64     65     66      3    7.53120    0.00000   -7.53120    0.00000    0.00000    0.00000 ;    C19-   C16-    O2-   C40
    47     46     45     48      3   30.33400    0.00000  -30.33400    0.00000    0.00000    0.00000 ;     H8-   C19-   C18-   C15
    47     46     64     51      3   30.33400    0.00000  -30.33400    0.00000    0.00000    0.00000 ;     H8-   C19-   C16-   C20
    47     46     64     65      3   30.33400    0.00000  -30.33400    0.00000    0.00000    0.00000 ;     H8-   C19-   C16-    O2
    48     45     46     64      3   30.33400    0.00000  -30.33400    0.00000    0.00000    0.00000 ;    C15-   C18-   C19-   C16
    48     49     51     52      3   30.33400    0.00000  -30.33400    0.00000    0.00000    0.00000 ;    C15-   C17-   C20-   C21
    48     49     51     64      3   30.33400    0.00000  -30.33400    0.00000    0.00000    0.00000 ;    C15-   C17-   C20-   C16
    49     51     52     53      3    0.00000    0.00000    0.00000    0.00000    0.00000    0.00000 ;    C17-   C20-   C21-    H9
    49     51     52     54      3    0.00000    0.00000    0.00000    0.00000    0.00000    0.00000 ;    C17-   C20-   C21-   C35
    49     51     52     87      3    0.00000    0.00000    0.00000    0.00000    0.00000    0.00000 ;    C17-   C20-   C21-   C27
    49     51     64     65      3   30.33400    0.00000  -30.33400    0.00000    0.00000    0.00000 ;    C17-   C20-   C16-    O2
    50     49     51     52      3   30.33400    0.00000  -30.33400    0.00000    0.00000    0.00000 ;     H7-   C17-   C20-   C21
    50     49     51     64      3   30.33400    0.00000  -30.33400    0.00000    0.00000    0.00000 ;     H7-   C17-   C20-   C16
    51     52     54     55      3    0.65084    1.95253    0.00000   -2.60338    0.00000    0.00000 ;    C20-   C21-   C35-   H19
    51     52     54     56      3    0.65084    1.95253    0.00000   -2.60338    0.00000    0.00000 ;    C20-   C21-   C35-   C36
    51     52     54     63      3    0.65084    1.95253    0.00000   -2.60338    0.00000    0.00000 ;    C20-   C21-   C35-   H20
    51     52     87     74      3    0.00000    0.00000    0.00000    0.00000    0.00000    0.00000 ;    C20-   C21-   C27-   C24
    51     52     87     88      3    0.00000    0.00000    0.00000    0.00000    0.00000    0.00000 ;    C20-   C21-   C27-   C26
    51     64     65     66      3    7.53120    0.00000   -7.53120    0.00000    0.00000    0.00000 ;    C20-   C16-    O2-   C40
    52     51     64     65      3   30.33400    0.00000  -30.33400    0.00000    0.00000    0.00000 ;    C21-   C20-   C16-    O2
    52     54     56     57      3    0.66944    2.00832    0.00000   -2.67776    0.00000    0.00000 ;    C21-   C35-   C36-   H51
    52     54     56     58      3    0.66944    2.00832    0.00000   -2.67776    0.00000    0.00000 ;    C21-   C35-   C36-   H52
    52     54     56     59      3    0.65084    1.95253    0.00000   -2.60338    0.00000    0.00000 ;    C21-   C35-   C36-   C94
    52     87     74     73      3   30.33400    0.00000  -30.33400    0.00000    0.00000    0.00000 ;    C21-   C27-   C24-    O1
    52     87     74     75      3   30.33400    0.00000  -30.33400    0.00000    0.00000    0.00000 ;    C21-   C27-   C24-   C28
    52     87     88     89      3   30.33400    0.00000  -30.33400    0.00000    0.00000    0.00000 ;    C21-   C27-   C26-   H11
    52     87     88     90      3   30.33400    0.00000  -30.33400    0.00000    0.00000    0.00000 ;    C21-   C27-   C26-   C23
    53     52     51     64      3    0.00000    0.00000    0.00000    0.00000    0.00000    0.00000 ;     H9-   C21-   C20-   C16
    53     52     54     55      3    0.62760    1.88280    0.00000   -2.51040    0.00000    0.00000 ;     H9-   C21-   C35-   H19
    53     52     54     56      3    0.66944    2.00832    0.00000   -2.67776    0.00000    0.00000 ;     H9-   C21-   C35-   C36
    53     52     54     63      3    0.62760    1.88280    0.00000   -2.51040    0.00000    0.00000 ;     H9-   C21-   C35-   H20
    53     52     87     74      3    0.00000    0.00000    0.00000    0.00000    0.00000    0.00000 ;     H9-   C21-   C27-   C24
    53     52     87     88      3    0.00000    0.00000    0.00000    0.00000    0.00000    0.00000 ;     H9-   C21-   C27-   C26
    54     52     51     64      3    0.00000    0.00000    0.00000    0.00000    0.00000    0.00000 ;    C35-   C21-   C20-   C16
    54     52     87     74      3    0.00000    0.00000    0.00000    0.00000    0.00000    0.00000 ;    C35-   C21-   C27-   C24
    54     52     87     88      3    0.00000    0.00000    0.00000    0.00000    0.00000    0.00000 ;    C35-   C21-   C27-   C26
    54     56     59     60      3    0.00000    0.00000    0.00000    0.00000    0.00000    0.00000 ;    C35-   C36-   C94-   O27
    54     56     59     61      3    0.00000    0.00000    0.00000    0.00000    0.00000    0.00000 ;    C35-   C36-   C94-   O28
    55     54     52     87      3    0.65084    1.95253    0.00000   -2.60338    0.00000    0.00000 ;    H19-   C35-   C21-   C27
    55     54     56     57      3    0.62760    1.88280    0.00000   -2.51040    0.00000    0.00000 ;    H19-   C35-   C36-   H51
    55     54     56     58      3    0.62760    1.88280    0.00000   -2.51040    0.00000    0.00000 ;    H19-   C35-   C36-   H52
    55     54     56     59      3    0.65084    1.95253    0.00000   -2.60338    0.00000    0.00000 ;    H19-   C35-   C36-   C94
    56     54     52     87      3    0.65084    1.95253    0.00000   -2.60338    0.00000    0.00000 ;    C36-   C35-   C21-   C27
    56     59     61     62      3   19.24640    0.00000  -19.24640    0.00000    0.00000    0.00000 ;    C36-   C94-   O28-   H57
    57     56     54     63      3    0.62760    1.88280    0.00000   -2.51040    0.00000    0.00000 ;    H51-   C36-   C35-   H20
    57     56     59     60      3    3.68192   -4.35136    0.00000    1.33888    0.00000    0.00000 ;    H51-   C36-   C94-   O27
    57     56     59     61      3    0.00000    0.00000    0.00000    0.00000    0.00000    0.00000 ;    H51-   C36-   C94-   O28
    58     56     54     63      3    0.62760    1.88280    0.00000   -2.51040    0.00000    0.00000 ;    H52-   C36-   C35-   H20
    58     56     59     60      3    3.68192   -4.35136    0.00000    1.33888    0.00000    0.00000 ;    H52-   C36-   C94-   O27
    58     56     59     61      3    0.00000    0.00000    0.00000    0.00000    0.00000    0.00000 ;    H52-   C36-   C94-   O28
    59     56     54     63      3    0.65084    1.95253    0.00000   -2.60338    0.00000    0.00000 ;    C94-   C36-   C35-   H20
    60     59     61     62      3   27.19600   -7.94960  -19.24640    0.00000    0.00000    0.00000 ;    O27-   C94-   O28-   H57
    63     54     52     87      3    0.65084    1.95253    0.00000   -2.60338    0.00000    0.00000 ;    H20-   C35-   C21-   C27
    64     51     52     87      3    0.00000    0.00000    0.00000    0.00000    0.00000    0.00000 ;    C16-   C20-   C21-   C27
    64     65     66     67      3    1.60387    4.81160    0.00000   -6.41547    0.00000    0.00000 ;    C16-    O2-   C40-   H24
    64     65     66     68      3    1.60387    4.81160    0.00000   -6.41547    0.00000    0.00000 ;    C16-    O2-   C40-   C47
    64     65     66     73      3    1.60387    4.81160    0.00000   -6.41547    0.00000    0.00000 ;    C16-    O2-   C40-    O1
    65     66     68     69      3    0.00000    0.00000    0.00000    0.00000    0.00000    0.00000 ;     O2-   C40-   C47-   C49
    65     66     68     71      3    0.00000    0.00000    0.00000    0.00000    0.00000    0.00000 ;     O2-   C40-   C47-   C50
    65     66     73     74      3    1.60387    4.81160    0.00000   -6.41547    0.00000    0.00000 ;     O2-   C40-    O1-   C24
    66     68     69     70      3   30.33400    0.00000  -30.33400    0.00000    0.00000    0.00000 ;    C40-   C47-   C49-   H28
    66     68     69    154      3   30.33400    0.00000  -30.33400    0.00000    0.00000    0.00000 ;    C40-   C47-   C49-   C52
    66     68     71     72      3   30.33400    0.00000  -30.33400    0.00000    0.00000    0.00000 ;    C40-   C47-   C50-   H29
    66     68     71    151      3   30.33400    0.00000  -30.33400    0.00000    0.00000    0.00000 ;    C40-   C47-   C50-   C51
    66     73     74     75      3    7.53120    0.00000   -7.53120    0.00000    0.00000    0.00000 ;    C40-    O1-   C24-   C28
    66     73     74     87      3    7.53120    0.00000   -7.53120    0.00000    0.00000    0.00000 ;    C40-    O1-   C24-   C27
    67     66     68     69      3    0.00000    0.00000    0.00000    0.00000    0.00000    0.00000 ;    H24-   C40-   C47-   C49
    67     66     68     71      3    0.00000    0.00000    0.00000    0.00000    0.00000    0.00000 ;    H24-   C40-   C47-   C50
    67     66     73     74      3    1.60387    4.81160    0.00000   -6.41547    0.00000    0.00000 ;    H24-   C40-    O1-   C24
    68     66     73     74      3    1.60387    4.81160    0.00000   -6.41547    0.00000    0.00000 ;    C47-   C40-    O1-   C24
    68     69    154    152      3   30.33400    0.00000  -30.33400    0.00000    0.00000    0.00000 ;    C47-   C49-   C52-   C48
    68     69    154    155      3   30.33400    0.00000  -30.33400    0.00000    0.00000    0.00000 ;    C47-   C49-   C52-   O10
    68     71    151    150      3   30.33400    0.00000  -30.33400    0.00000    0.00000    0.00000 ;    C47-   C50-   C51-   O11
    68     71    151    152      3   30.33400    0.00000  -30.33400    0.00000    0.00000    0.00000 ;    C47-   C50-   C51-   C48
    69     68     66     73      3    0.00000    0.00000    0.00000    0.00000    0.00000    0.00000 ;    C49-   C47-   C40-    O1
    69     68     71     72      3   30.33400    0.00000  -30.33400    0.00000    0.00000    0.00000 ;    C49-   C47-   C50-   H29
    69     68     71    151      3   30.33400    0.00000  -30.33400    0.00000    0.00000    0.00000 ;    C49-   C47-   C50-   C51
    69    154    152    151      3   30.33400    0.00000  -30.33400    0.00000    0.00000    0.00000 ;    C49-   C52-   C48-   C51
    69    154    152    153      3   30.33400    0.00000  -30.33400    0.00000    0.00000    0.00000 ;    C49-   C52-   C48-   H30
    69    154    155    156      3    7.53120    0.00000   -7.53120    0.00000    0.00000    0.00000 ;    C49-   C52-   O10-   C91
    70     69     68     71      3   30.33400    0.00000  -30.33400    0.00000    0.00000    0.00000 ;    H28-   C49-   C47-   C50
    70     69    154    152      3   30.33400    0.00000  -30.33400    0.00000    0.00000    0.00000 ;    H28-   C49-   C52-   C48
    70     69    154    155      3   30.33400    0.00000  -30.33400    0.00000    0.00000    0.00000 ;    H28-   C49-   C52-   O10
    71     68     66     73      3    0.00000    0.00000    0.00000    0.00000    0.00000    0.00000 ;    C50-   C47-   C40-    O1
    71     68     69    154      3   30.33400    0.00000  -30.33400    0.00000    0.00000    0.00000 ;    C50-   C47-   C49-   C52
    71    151    150    149      3    7.53120    0.00000   -7.53120    0.00000    0.00000    0.00000 ;    C50-   C51-   O11-   C65
    71    151    152    153      3   30.33400    0.00000  -30.33400    0.00000    0.00000    0.00000 ;    C50-   C51-   C48-   H30
    71    151    152    154      3   30.33400    0.00000  -30.33400    0.00000    0.00000    0.00000 ;    C50-   C51-   C48-   C52
    72     71    151    150      3   30.33400    0.00000  -30.33400    0.00000    0.00000    0.00000 ;    H29-   C50-   C51-   O11
    72     71    151    152      3   30.33400    0.00000  -30.33400    0.00000    0.00000    0.00000 ;    H29-   C50-   C51-   C48
    73     74     75     76      3   30.33400    0.00000  -30.33400    0.00000    0.00000    0.00000 ;     O1-   C24-   C28-   C25
    73     74     75     86      3   30.33400    0.00000  -30.33400    0.00000    0.00000    0.00000 ;     O1-   C24-   C28-   H12
    73     74     87     88      3   30.33400    0.00000  -30.33400    0.00000    0.00000    0.00000 ;     O1-   C24-   C27-   C26
    74     75     76     77      3   30.33400    0.00000  -30.33400    0.00000    0.00000    0.00000 ;    C24-   C28-   C25-    O3
    74     75     76     90      3   30.33400    0.00000  -30.33400    0.00000    0.00000    0.00000 ;    C24-   C28-   C25-   C23
    74     87     88     89      3   30.33400    0.00000  -30.33400    0.00000    0.00000    0.00000 ;    C24-   C27-   C26-   H11
    74     87     88     90      3   30.33400    0.00000  -30.33400    0.00000    0.00000    0.00000 ;    C24-   C27-   C26-   C23
    75     74     87     88      3   30.33400    0.00000  -30.33400    0.00000    0.00000    0.00000 ;    C28-   C24-   C27-   C26
    75     76     77     78      3    7.53120    0.00000   -7.53120    0.00000    0.00000    0.00000 ;    C28-   C25-    O3-   C38
    75     76     90     88      3   30.33400    0.00000  -30.33400    0.00000    0.00000    0.00000 ;    C28-   C25-   C23-   C26
    75     76     90     91      3   30.33400    0.00000  -30.33400    0.00000    0.00000    0.00000 ;    C28-   C25-   C23-   C22
    76     75     74     87      3   30.33400    0.00000  -30.33400    0.00000    0.00000    0.00000 ;    C25-   C28-   C24-   C27
    76     77     78     79      3    1.60387    4.81160    0.00000   -6.41547    0.00000    0.00000 ;    C25-    O3-   C38-    O6
    76     77     78     80      3    1.60387    4.81160    0.00000   -6.41547    0.00000    0.00000 ;    C25-    O3-   C38-   H22
    76     77     78     81      3    1.60387    4.81160    0.00000   -6.41547    0.00000    0.00000 ;    C25-    O3-   C38-   C53
    76     90     88     87      3   30.33400    0.00000  -30.33400    0.00000    0.00000    0.00000 ;    C25-   C23-   C26-   C27
    76     90     88     89      3   30.33400    0.00000  -30.33400    0.00000    0.00000    0.00000 ;    C25-   C23-   C26-   H11
    76     90     91     92      3    0.00000    0.00000    0.00000    0.00000    0.00000    0.00000 ;    C25-   C23-   C22-   H10
    76     90     91     93      3    0.00000    0.00000    0.00000    0.00000    0.00000    0.00000 ;    C25-   C23-   C22-   C33
    76     90     91    102      3    0.00000    0.00000    0.00000    0.00000    0.00000    0.00000 ;    C25-   C23-   C22-   C13
    77     76     75     86      3   30.33400    0.00000  -30.33400    0.00000    0.00000    0.00000 ;     O3-   C25-   C28-   H12
    77     76     90     88      3   30.33400    0.00000  -30.33400    0.00000    0.00000    0.00000 ;     O3-   C25-   C23-   C26
    77     76     90     91      3   30.33400    0.00000  -30.33400    0.00000    0.00000    0.00000 ;     O3-   C25-   C23-   C22
    77     78     79    103      3    1.60387    4.81160    0.00000   -6.41547    0.00000    0.00000 ;     O3-   C38-    O6-   C10
    77     78     81     82      3    0.00000    0.00000    0.00000    0.00000    0.00000    0.00000 ;     O3-   C38-   C53-   C55
    77     78     81     84      3    0.00000    0.00000    0.00000    0.00000    0.00000    0.00000 ;     O3-   C38-   C53-   C56
    78     77     76     90      3    7.53120    0.00000   -7.53120    0.00000    0.00000    0.00000 ;    C38-    O3-   C25-   C23
    78     79    103    102      3    7.53120    0.00000   -7.53120    0.00000    0.00000    0.00000 ;    C38-    O6-   C10-   C13
    78     79    103    104      3    7.53120    0.00000   -7.53120    0.00000    0.00000    0.00000 ;    C38-    O6-   C10-   C14
    78     81     82     83      3   30.33400    0.00000  -30.33400    0.00000    0.00000    0.00000 ;    C38-   C53-   C55-   H31
    78     81     82    136      3   30.33400    0.00000  -30.33400    0.00000    0.00000    0.00000 ;    C38-   C53-   C55-   C58
    78     81     84     85      3   30.33400    0.00000  -30.33400    0.00000    0.00000    0.00000 ;    C38-   C53-   C56-   H32
    78     81     84    133      3   30.33400    0.00000  -30.33400    0.00000    0.00000    0.00000 ;    C38-   C53-   C56-   C57
    79     78     81     82      3    0.00000    0.00000    0.00000    0.00000    0.00000    0.00000 ;     O6-   C38-   C53-   C55
    79     78     81     84      3    0.00000    0.00000    0.00000    0.00000    0.00000    0.00000 ;     O6-   C38-   C53-   C56
    79    103    102     91      3   30.33400    0.00000  -30.33400    0.00000    0.00000    0.00000 ;     O6-   C10-   C13-   C22
    79    103    104    105      3   30.33400    0.00000  -30.33400    0.00000    0.00000    0.00000 ;     O6-   C10-   C14-    H6
    79    103    104    106      3   30.33400    0.00000  -30.33400    0.00000    0.00000    0.00000 ;     O6-   C10-   C14-   C11
    80     78     79    103      3    1.60387    4.81160    0.00000   -6.41547    0.00000    0.00000 ;    H22-   C38-    O6-   C10
    80     78     81     82      3    0.00000    0.00000    0.00000    0.00000    0.00000    0.00000 ;    H22-   C38-   C53-   C55
    80     78     81     84      3    0.00000    0.00000    0.00000    0.00000    0.00000    0.00000 ;    H22-   C38-   C53-   C56
    81     78     79    103      3    1.60387    4.81160    0.00000   -6.41547    0.00000    0.00000 ;    C53-   C38-    O6-   C10
    81     82    136    134      3   30.33400    0.00000  -30.33400    0.00000    0.00000    0.00000 ;    C53-   C55-   C58-   C54
    81     82    136    137      3   30.33400    0.00000  -30.33400    0.00000    0.00000    0.00000 ;    C53-   C55-   C58-   O13
    81     84    133    132      3   30.33400    0.00000  -30.33400    0.00000    0.00000    0.00000 ;    C53-   C56-   C57-   O14
    81     84    133    134      3   30.33400    0.00000  -30.33400    0.00000    0.00000    0.00000 ;    C53-   C56-   C57-   C54
    82     81     84     85      3   30.33400    0.00000  -30.33400    0.00000    0.00000    0.00000 ;    C55-   C53-   C56-   H32
    82     81     84    133      3   30.33400    0.00000  -30.33400    0.00000    0.00000    0.00000 ;    C55-   C53-   C56-   C57
    82    136    134    133      3   30.33400    0.00000  -30.33400    0.00000    0.00000    0.00000 ;    C55-   C58-   C54-   C57
    82    136    134    135      3   30.33400    0.00000  -30.33400    0.00000    0.00000    0.00000 ;    C55-   C58-   C54-   H33
    82    136    137    138      3    7.53120    0.00000   -7.53120    0.00000    0.00000    0.00000 ;    C55-   C58-   O13-   C70
    83     82     81     84      3   30.33400    0.00000  -30.33400    0.00000    0.00000    0.00000 ;    H31-   C55-   C53-   C56
    83     82    136    134      3   30.33400    0.00000  -30.33400    0.00000    0.00000    0.00000 ;    H31-   C55-   C58-   C54
    83     82    136    137      3   30.33400    0.00000  -30.33400    0.00000    0.00000    0.00000 ;    H31-   C55-   C58-   O13
    84     81     82    136      3   30.33400    0.00000  -30.33400    0.00000    0.00000    0.00000 ;    C56-   C53-   C55-   C58
    84    133    132    131      3    7.53120    0.00000   -7.53120    0.00000    0.00000    0.00000 ;    C56-   C57-   O14-   C72
    84    133    134    135      3   30.33400    0.00000  -30.33400    0.00000    0.00000    0.00000 ;    C56-   C57-   C54-   H33
    84    133    134    136      3   30.33400    0.00000  -30.33400    0.00000    0.00000    0.00000 ;    C56-   C57-   C54-   C58
    85     84    133    132      3   30.33400    0.00000  -30.33400    0.00000    0.00000    0.00000 ;    H32-   C56-   C57-   O14
    85     84    133    134      3   30.33400    0.00000  -30.33400    0.00000    0.00000    0.00000 ;    H32-   C56-   C57-   C54
    86     75     74     87      3   30.33400    0.00000  -30.33400    0.00000    0.00000    0.00000 ;    H12-   C28-   C24-   C27
    86     75     76     90      3   30.33400    0.00000  -30.33400    0.00000    0.00000    0.00000 ;    H12-   C28-   C25-   C23
    87     88     90     91      3   30.33400    0.00000  -30.33400    0.00000    0.00000    0.00000 ;    C27-   C26-   C23-   C22
    88     90     91     92      3    0.00000    0.00000    0.00000    0.00000    0.00000    0.00000 ;    C26-   C23-   C22-   H10
    88     90     91     93      3    0.00000    0.00000    0.00000    0.00000    0.00000    0.00000 ;    C26-   C23-   C22-   C33
    88     90     91    102      3    0.00000    0.00000    0.00000    0.00000    0.00000    0.00000 ;    C26-   C23-   C22-   C13
    89     88     90     91      3   30.33400    0.00000  -30.33400    0.00000    0.00000    0.00000 ;    H11-   C26-   C23-   C22
    90     91     93     94      3    0.65084    1.95253    0.00000   -2.60338    0.00000    0.00000 ;    C23-   C22-   C33-   H17
    90     91     93     95      3    0.65084    1.95253    0.00000   -2.60338    0.00000    0.00000 ;    C23-   C22-   C33-   C34
    90     91     93    101      3    0.65084    1.95253    0.00000   -2.60338    0.00000    0.00000 ;    C23-   C22-   C33-   H18
    90     91    102    103      3    0.00000    0.00000    0.00000    0.00000    0.00000    0.00000 ;    C23-   C22-   C13-   C10
    91     93     95     96      3    0.66944    2.00832    0.00000   -2.67776    0.00000    0.00000 ;    C22-   C33-   C34-   H53
    91     93     95     97      3    0.66944    2.00832    0.00000   -2.67776    0.00000    0.00000 ;    C22-   C33-   C34-   H54
    91     93     95     98      3    0.65084    1.95253    0.00000   -2.60338    0.00000    0.00000 ;    C22-   C33-   C34-   C95
    91    102    103    104      3   30.33400    0.00000  -30.33400    0.00000    0.00000    0.00000 ;    C22-   C13-   C10-   C14
    92     91     93     94      3    0.62760    1.88280    0.00000   -2.51040    0.00000    0.00000 ;    H10-   C22-   C33-   H17
    92     91     93     95      3    0.66944    2.00832    0.00000   -2.67776    0.00000    0.00000 ;    H10-   C22-   C33-   C34
    92     91     93    101      3    0.62760    1.88280    0.00000   -2.51040    0.00000    0.00000 ;    H10-   C22-   C33-   H18
    92     91    102    103      3    0.00000    0.00000    0.00000    0.00000    0.00000    0.00000 ;    H10-   C22-   C13-   C10
    93     91    102    103      3    0.00000    0.00000    0.00000    0.00000    0.00000    0.00000 ;    C33-   C22-   C13-   C10
    93     95     98     99      3    0.00000    0.00000    0.00000    0.00000    0.00000    0.00000 ;    C33-   C34-   C95-   O25
    93     95     98    100      3    0.00000    0.00000    0.00000    0.00000    0.00000    0.00000 ;    C33-   C34-   C95-   O26
    94     93     91    102      3    0.65084    1.95253    0.00000   -2.60338    0.00000    0.00000 ;    H17-   C33-   C22-   C13
    94     93     95     96      3    0.62760    1.88280    0.00000   -2.51040    0.00000    0.00000 ;    H17-   C33-   C34-   H53
    94     93     95     97      3    0.62760    1.88280    0.00000   -2.51040    0.00000    0.00000 ;    H17-   C33-   C34-   H54
    94     93     95     98      3    0.65084    1.95253    0.00000   -2.60338    0.00000    0.00000 ;    H17-   C33-   C34-   C95
    95     93     91    102      3    0.65084    1.95253    0.00000   -2.60338    0.00000    0.00000 ;    C34-   C33-   C22-   C13
    96     95     93    101      3    0.62760    1.88280    0.00000   -2.51040    0.00000    0.00000 ;    H53-   C34-   C33-   H18
    96     95     98     99      3    3.68192   -4.35136    0.00000    1.33888    0.00000    0.00000 ;    H53-   C34-   C95-   O25
    96     95     98    100      3    3.68192   -4.35136    0.00000    1.33888    0.00000    0.00000 ;    H53-   C34-   C95-   O26
    97     95     93    101      3    0.62760    1.88280    0.00000   -2.51040    0.00000    0.00000 ;    H54-   C34-   C33-   H18
    97     95     98     99      3    3.68192   -4.35136    0.00000    1.33888    0.00000    0.00000 ;    H54-   C34-   C95-   O25
    97     95     98    100      3    3.68192   -4.35136    0.00000    1.33888    0.00000    0.00000 ;    H54-   C34-   C95-   O26
    98     95     93    101      3    0.65084    1.95253    0.00000   -2.60338    0.00000    0.00000 ;    C95-   C34-   C33-   H18
   101     93     91    102      3    0.65084    1.95253    0.00000   -2.60338    0.00000    0.00000 ;    H18-   C33-   C22-   C13
   102     19     18    106      3   30.33400    0.00000  -30.33400    0.00000    0.00000    0.00000 ;    C13-   C12-    C9-   C11
   102    103    104    105      3   30.33400    0.00000  -30.33400    0.00000    0.00000    0.00000 ;    C13-   C10-   C14-    H6
   102    103    104    106      3   30.33400    0.00000  -30.33400    0.00000    0.00000    0.00000 ;    C13-   C10-   C14-   C11
   103    104    106    107      3   30.33400    0.00000  -30.33400    0.00000    0.00000    0.00000 ;    C10-   C14-   C11-    O5
   104    106    107    108      3    7.53120    0.00000   -7.53120    0.00000    0.00000    0.00000 ;    C14-   C11-    O5-   C37
   105    104    106    107      3   30.33400    0.00000  -30.33400    0.00000    0.00000    0.00000 ;     H6-   C14-   C11-    O5
   106    107    108    109      3    1.60387    4.81160    0.00000   -6.41547    0.00000    0.00000 ;    C11-    O5-   C37-   H21
   106    107    108    110      3    1.60387    4.81160    0.00000   -6.41547    0.00000    0.00000 ;    C11-    O5-   C37-   C59
   107    108    110    111      3    0.00000    0.00000    0.00000    0.00000    0.00000    0.00000 ;     O5-   C37-   C59-   C62
   107    108    110    113      3    0.00000    0.00000    0.00000    0.00000    0.00000    0.00000 ;     O5-   C37-   C59-   C61
   108    110    111    112      3   30.33400    0.00000  -30.33400    0.00000    0.00000    0.00000 ;    C37-   C59-   C62-   H35
   108    110    111    118      3   30.33400    0.00000  -30.33400    0.00000    0.00000    0.00000 ;    C37-   C59-   C62-   C63
   108    110    113    114      3   30.33400    0.00000  -30.33400    0.00000    0.00000    0.00000 ;    C37-   C59-   C61-   H34
   108    110    113    115      3   30.33400    0.00000  -30.33400    0.00000    0.00000    0.00000 ;    C37-   C59-   C61-   C64
   109    108    110    111      3    0.00000    0.00000    0.00000    0.00000    0.00000    0.00000 ;    H21-   C37-   C59-   C62
   109    108    110    113      3    0.00000    0.00000    0.00000    0.00000    0.00000    0.00000 ;    H21-   C37-   C59-   C61
   110    111    118    116      3   30.33400    0.00000  -30.33400    0.00000    0.00000    0.00000 ;    C59-   C62-   C63-   C60
   110    111    118    119      3   30.33400    0.00000  -30.33400    0.00000    0.00000    0.00000 ;    C59-   C62-   C63-   O15
   110    113    115    116      3   30.33400    0.00000  -30.33400    0.00000    0.00000    0.00000 ;    C59-   C61-   C64-   C60
   110    113    115    186      3   30.33400    0.00000  -30.33400    0.00000    0.00000    0.00000 ;    C59-   C61-   C64-   O12
   111    110    113    114      3   30.33400    0.00000  -30.33400    0.00000    0.00000    0.00000 ;    C62-   C59-   C61-   H34
   111    110    113    115      3   30.33400    0.00000  -30.33400    0.00000    0.00000    0.00000 ;    C62-   C59-   C61-   C64
   111    118    116    115      3   30.33400    0.00000  -30.33400    0.00000    0.00000    0.00000 ;    C62-   C63-   C60-   C64
   111    118    116    117      3   30.33400    0.00000  -30.33400    0.00000    0.00000    0.00000 ;    C62-   C63-   C60-   H36
   111    118    119    120      3    7.53120    0.00000   -7.53120    0.00000    0.00000    0.00000 ;    C62-   C63-   O15-   C77
   112    111    110    113      3   30.33400    0.00000  -30.33400    0.00000    0.00000    0.00000 ;    H35-   C62-   C59-   C61
   112    111    118    116      3   30.33400    0.00000  -30.33400    0.00000    0.00000    0.00000 ;    H35-   C62-   C63-   C60
   112    111    118    119      3   30.33400    0.00000  -30.33400    0.00000    0.00000    0.00000 ;    H35-   C62-   C63-   O15
   113    110    111    118      3   30.33400    0.00000  -30.33400    0.00000    0.00000    0.00000 ;    C61-   C59-   C62-   C63
   113    115    116    117      3   30.33400    0.00000  -30.33400    0.00000    0.00000    0.00000 ;    C61-   C64-   C60-   H36
   113    115    116    118      3   30.33400    0.00000  -30.33400    0.00000    0.00000    0.00000 ;    C61-   C64-   C60-   C63
   113    115    186    185      3    7.53120    0.00000   -7.53120    0.00000    0.00000    0.00000 ;    C61-   C64-   O12-   C79
   114    113    115    116      3   30.33400    0.00000  -30.33400    0.00000    0.00000    0.00000 ;    H34-   C61-   C64-   C60
   114    113    115    186      3   30.33400    0.00000  -30.33400    0.00000    0.00000    0.00000 ;    H34-   C61-   C64-   O12
   115    116    118    119      3   30.33400    0.00000  -30.33400    0.00000    0.00000    0.00000 ;    C64-   C60-   C63-   O15
   115    186    185    175      3    7.53120    0.00000   -7.53120    0.00000    0.00000    0.00000 ;    C64-   O12-   C79-   C82
   115    186    185    183      3    7.53120    0.00000   -7.53120    0.00000    0.00000    0.00000 ;    C64-   O12-   C79-   C81
   116    115    186    185      3    7.53120    0.00000   -7.53120    0.00000    0.00000    0.00000 ;    C60-   C64-   O12-   C79
   116    118    119    120      3    7.53120    0.00000   -7.53120    0.00000    0.00000    0.00000 ;    C60-   C63-   O15-   C77
   117    116    115    186      3   30.33400    0.00000  -30.33400    0.00000    0.00000    0.00000 ;    H36-   C60-   C64-   O12
   117    116    118    119      3   30.33400    0.00000  -30.33400    0.00000    0.00000    0.00000 ;    H36-   C60-   C63-   O15
   118    116    115    186      3   30.33400    0.00000  -30.33400    0.00000    0.00000    0.00000 ;    C63-   C60-   C64-   O12
   118    119    120    121      3    7.53120    0.00000   -7.53120    0.00000    0.00000    0.00000 ;    C63-   O15-   C77-   C74
   118    119    120    123      3    7.53120    0.00000   -7.53120    0.00000    0.00000    0.00000 ;    C63-   O15-   C77-   C73
   119    120    121    122      3   30.33400    0.00000  -30.33400    0.00000    0.00000    0.00000 ;    O15-   C77-   C74-   H45
   119    120    121    131      3   30.33400    0.00000  -30.33400    0.00000    0.00000    0.00000 ;    O15-   C77-   C74-   C72
   119    120    123    124      3   30.33400    0.00000  -30.33400    0.00000    0.00000    0.00000 ;    O15-   C77-   C73-   H40
   119    120    123    125      3   30.33400    0.00000  -30.33400    0.00000    0.00000    0.00000 ;    O15-   C77-   C73-   C76
   120    121    131    129      3   30.33400    0.00000  -30.33400    0.00000    0.00000    0.00000 ;    C77-   C74-   C72-   C75
   120    121    131    132      3   30.33400    0.00000  -30.33400    0.00000    0.00000    0.00000 ;    C77-   C74-   C72-   O14
   120    123    125    126      3   30.33400    0.00000  -30.33400    0.00000    0.00000    0.00000 ;    C77-   C73-   C76-   C78
   120    123    125    129      3   30.33400    0.00000  -30.33400    0.00000    0.00000    0.00000 ;    C77-   C73-   C76-   C75
   121    120    123    124      3   30.33400    0.00000  -30.33400    0.00000    0.00000    0.00000 ;    C74-   C77-   C73-   H40
   121    120    123    125      3   30.33400    0.00000  -30.33400    0.00000    0.00000    0.00000 ;    C74-   C77-   C73-   C76
   121    131    129    125      3   30.33400    0.00000  -30.33400    0.00000    0.00000    0.00000 ;    C74-   C72-   C75-   C76
   121    131    129    130      3   30.33400    0.00000  -30.33400    0.00000    0.00000    0.00000 ;    C74-   C72-   C75-   H39
   121    131    132    133      3    7.53120    0.00000   -7.53120    0.00000    0.00000    0.00000 ;    C74-   C72-   O14-   C57
   122    121    120    123      3   30.33400    0.00000  -30.33400    0.00000    0.00000    0.00000 ;    H45-   C74-   C77-   C73
   122    121    131    129      3   30.33400    0.00000  -30.33400    0.00000    0.00000    0.00000 ;    H45-   C74-   C72-   C75
   122    121    131    132      3   30.33400    0.00000  -30.33400    0.00000    0.00000    0.00000 ;    H45-   C74-   C72-   O14
   123    120    121    131      3   30.33400    0.00000  -30.33400    0.00000    0.00000    0.00000 ;    C73-   C77-   C74-   C72
   123    125    126    127      3   30.33400    0.00000  -30.33400    0.00000    0.00000    0.00000 ;    C73-   C76-   C78-   O19
   123    125    126    128      3   30.33400    0.00000  -30.33400    0.00000    0.00000    0.00000 ;    C73-   C76-   C78-   O20
   123    125    129    130      3   30.33400    0.00000  -30.33400    0.00000    0.00000    0.00000 ;    C73-   C76-   C75-   H39
   123    125    129    131      3   30.33400    0.00000  -30.33400    0.00000    0.00000    0.00000 ;    C73-   C76-   C75-   C72
   124    123    125    126      3   30.33400    0.00000  -30.33400    0.00000    0.00000    0.00000 ;    H40-   C73-   C76-   C78
   124    123    125    129      3   30.33400    0.00000  -30.33400    0.00000    0.00000    0.00000 ;    H40-   C73-   C76-   C75
   125    129    131    132      3   30.33400    0.00000  -30.33400    0.00000    0.00000    0.00000 ;    C76-   C75-   C72-   O14
   126    125    129    130      3   30.33400    0.00000  -30.33400    0.00000    0.00000    0.00000 ;    C78-   C76-   C75-   H39
   126    125    129    131      3   30.33400    0.00000  -30.33400    0.00000    0.00000    0.00000 ;    C78-   C76-   C75-   C72
   127    126    125    129      3   30.33400    0.00000  -30.33400    0.00000    0.00000    0.00000 ;    O19-   C78-   C76-   C75
   128    126    125    129      3   30.33400    0.00000  -30.33400    0.00000    0.00000    0.00000 ;    O20-   C78-   C76-   C75
   129    131    132    133      3    7.53120    0.00000   -7.53120    0.00000    0.00000    0.00000 ;    C75-   C72-   O14-   C57
   130    129    131    132      3   30.33400    0.00000  -30.33400    0.00000    0.00000    0.00000 ;    H39-   C75-   C72-   O14
   131    132    133    134      3    7.53120    0.00000   -7.53120    0.00000    0.00000    0.00000 ;    C72-   O14-   C57-   C54
   132    133    134    135      3   30.33400    0.00000  -30.33400    0.00000    0.00000    0.00000 ;    O14-   C57-   C54-   H33
   132    133    134    136      3   30.33400    0.00000  -30.33400    0.00000    0.00000    0.00000 ;    O14-   C57-   C54-   C58
   133    134    136    137      3   30.33400    0.00000  -30.33400    0.00000    0.00000    0.00000 ;    C57-   C54-   C58-   O13
   134    136    137    138      3    7.53120    0.00000   -7.53120    0.00000    0.00000    0.00000 ;    C54-   C58-   O13-   C70
   135    134    136    137      3   30.33400    0.00000  -30.33400    0.00000    0.00000    0.00000 ;    H33-   C54-   C58-   O13
   136    137    138    139      3    7.53120    0.00000   -7.53120    0.00000    0.00000    0.00000 ;    C58-   O13-   C70-   C67
   136    137    138    141      3    7.53120    0.00000   -7.53120    0.00000    0.00000    0.00000 ;    C58-   O13-   C70-   C66
   137    138    139    140      3   30.33400    0.00000  -30.33400    0.00000    0.00000    0.00000 ;    O13-   C70-   C67-   H48
   137    138    139    149      3   30.33400    0.00000  -30.33400    0.00000    0.00000    0.00000 ;    O13-   C70-   C67-   C65
   137    138    141    142      3   30.33400    0.00000  -30.33400    0.00000    0.00000    0.00000 ;    O13-   C70-   C66-   H38
   137    138    141    143      3   30.33400    0.00000  -30.33400    0.00000    0.00000    0.00000 ;    O13-   C70-   C66-   C69
   138    139    149    147      3   30.33400    0.00000  -30.33400    0.00000    0.00000    0.00000 ;    C70-   C67-   C65-   C68
   138    139    149    150      3   30.33400    0.00000  -30.33400    0.00000    0.00000    0.00000 ;    C70-   C67-   C65-   O11
   138    141    143    144      3   30.33400    0.00000  -30.33400    0.00000    0.00000    0.00000 ;    C70-   C66-   C69-   C71
   138    141    143    147      3   30.33400    0.00000  -30.33400    0.00000    0.00000    0.00000 ;    C70-   C66-   C69-   C68
   139    138    141    142      3   30.33400    0.00000  -30.33400    0.00000    0.00000    0.00000 ;    C67-   C70-   C66-   H38
   139    138    141    143      3   30.33400    0.00000  -30.33400    0.00000    0.00000    0.00000 ;    C67-   C70-   C66-   C69
   139    149    147    143      3   30.33400    0.00000  -30.33400    0.00000    0.00000    0.00000 ;    C67-   C65-   C68-   C69
   139    149    147    148      3   30.33400    0.00000  -30.33400    0.00000    0.00000    0.00000 ;    C67-   C65-   C68-   H37
   139    149    150    151      3    7.53120    0.00000   -7.53120    0.00000    0.00000    0.00000 ;    C67-   C65-   O11-   C51
   140    139    138    141      3   30.33400    0.00000  -30.33400    0.00000    0.00000    0.00000 ;    H48-   C67-   C70-   C66
   140    139    149    147      3   30.33400    0.00000  -30.33400    0.00000    0.00000    0.00000 ;    H48-   C67-   C65-   C68
   140    139    149    150      3   30.33400    0.00000  -30.33400    0.00000    0.00000    0.00000 ;    H48-   C67-   C65-   O11
   141    138    139    149      3   30.33400    0.00000  -30.33400    0.00000    0.00000    0.00000 ;    C66-   C70-   C67-   C65
   141    143    144    145      3   30.33400    0.00000  -30.33400    0.00000    0.00000    0.00000 ;    C66-   C69-   C71-   O21
   141    143    144    146      3   30.33400    0.00000  -30.33400    0.00000    0.00000    0.00000 ;    C66-   C69-   C71-   O22
   141    143    147    148      3   30.33400    0.00000  -30.33400    0.00000    0.00000    0.00000 ;    C66-   C69-   C68-   H37
   141    143    147    149      3   30.33400    0.00000  -30.33400    0.00000    0.00000    0.00000 ;    C66-   C69-   C68-   C65
   142    141    143    144      3   30.33400    0.00000  -30.33400    0.00000    0.00000    0.00000 ;    H38-   C66-   C69-   C71
   142    141    143    147      3   30.33400    0.00000  -30.33400    0.00000    0.00000    0.00000 ;    H38-   C66-   C69-   C68
   143    147    149    150      3   30.33400    0.00000  -30.33400    0.00000    0.00000    0.00000 ;    C69-   C68-   C65-   O11
   144    143    147    148      3   30.33400    0.00000  -30.33400    0.00000    0.00000    0.00000 ;    C71-   C69-   C68-   H37
   144    143    147    149      3   30.33400    0.00000  -30.33400    0.00000    0.00000    0.00000 ;    C71-   C69-   C68-   C65
   145    144    143    147      3   30.33400    0.00000  -30.33400    0.00000    0.00000    0.00000 ;    O21-   C71-   C69-   C68
   146    144    143    147      3   30.33400    0.00000  -30.33400    0.00000    0.00000    0.00000 ;    O22-   C71-   C69-   C68
   147    149    150    151      3    7.53120    0.00000   -7.53120    0.00000    0.00000    0.00000 ;    C68-   C65-   O11-   C51
   148    147    149    150      3   30.33400    0.00000  -30.33400    0.00000    0.00000    0.00000 ;    H37-   C68-   C65-   O11
   149    150    151    152      3    7.53120    0.00000   -7.53120    0.00000    0.00000    0.00000 ;    C65-   O11-   C51-   C48
   150    151    152    153      3   30.33400    0.00000  -30.33400    0.00000    0.00000    0.00000 ;    O11-   C51-   C48-   H30
   150    151    152    154      3   30.33400    0.00000  -30.33400    0.00000    0.00000    0.00000 ;    O11-   C51-   C48-   C52
   151    152    154    155      3   30.33400    0.00000  -30.33400    0.00000    0.00000    0.00000 ;    C51-   C48-   C52-   O10
   152    154    155    156      3    7.53120    0.00000   -7.53120    0.00000    0.00000    0.00000 ;    C48-   C52-   O10-   C91
   153    152    154    155      3   30.33400    0.00000  -30.33400    0.00000    0.00000    0.00000 ;    H30-   C48-   C52-   O10
   154    155    156    157      3    7.53120    0.00000   -7.53120    0.00000    0.00000    0.00000 ;    C52-   O10-   C91-   C88
   154    155    156    159      3    7.53120    0.00000   -7.53120    0.00000    0.00000    0.00000 ;    C52-   O10-   C91-   C87
   155    156    157    158      3   30.33400    0.00000  -30.33400    0.00000    0.00000    0.00000 ;    O10-   C91-   C88-   H47
   155    156    157    167      3   30.33400    0.00000  -30.33400    0.00000    0.00000    0.00000 ;    O10-   C91-   C88-   C86
   155    156    159    160      3   30.33400    0.00000  -30.33400    0.00000    0.00000    0.00000 ;    O10-   C91-   C87-   H44
   155    156    159    161      3   30.33400    0.00000  -30.33400    0.00000    0.00000    0.00000 ;    O10-   C91-   C87-   C90
   156    157    167    165      3   30.33400    0.00000  -30.33400    0.00000    0.00000    0.00000 ;    C91-   C88-   C86-   C89
   156    157    167    168      3   30.33400    0.00000  -30.33400    0.00000    0.00000    0.00000 ;    C91-   C88-   C86-   O16
   156    159    161    162      3   30.33400    0.00000  -30.33400    0.00000    0.00000    0.00000 ;    C91-   C87-   C90-   C92
   156    159    161    165      3   30.33400    0.00000  -30.33400    0.00000    0.00000    0.00000 ;    C91-   C87-   C90-   C89
   157    156    159    160      3   30.33400    0.00000  -30.33400    0.00000    0.00000    0.00000 ;    C88-   C91-   C87-   H44
   157    156    159    161      3   30.33400    0.00000  -30.33400    0.00000    0.00000    0.00000 ;    C88-   C91-   C87-   C90
   157    167    165    161      3   30.33400    0.00000  -30.33400    0.00000    0.00000    0.00000 ;    C88-   C86-   C89-   C90
   157    167    165    166      3   30.33400    0.00000  -30.33400    0.00000    0.00000    0.00000 ;    C88-   C86-   C89-   H43
   157    167    168    169      3    7.53120    0.00000   -7.53120    0.00000    0.00000    0.00000 ;    C88-   C86-   O16-   C46
   158    157    156    159      3   30.33400    0.00000  -30.33400    0.00000    0.00000    0.00000 ;    H47-   C88-   C91-   C87
   158    157    167    165      3   30.33400    0.00000  -30.33400    0.00000    0.00000    0.00000 ;    H47-   C88-   C86-   C89
   158    157    167    168      3   30.33400    0.00000  -30.33400    0.00000    0.00000    0.00000 ;    H47-   C88-   C86-   O16
   159    156    157    167      3   30.33400    0.00000  -30.33400    0.00000    0.00000    0.00000 ;    C87-   C91-   C88-   C86
   159    161    162    163      3   30.33400    0.00000  -30.33400    0.00000    0.00000    0.00000 ;    C87-   C90-   C92-   O23
   159    161    162    164      3   30.33400    0.00000  -30.33400    0.00000    0.00000    0.00000 ;    C87-   C90-   C92-   O24
   159    161    165    166      3   30.33400    0.00000  -30.33400    0.00000    0.00000    0.00000 ;    C87-   C90-   C89-   H43
   159    161    165    167      3   30.33400    0.00000  -30.33400    0.00000    0.00000    0.00000 ;    C87-   C90-   C89-   C86
   160    159    161    162      3   30.33400    0.00000  -30.33400    0.00000    0.00000    0.00000 ;    H44-   C87-   C90-   C92
   160    159    161    165      3   30.33400    0.00000  -30.33400    0.00000    0.00000    0.00000 ;    H44-   C87-   C90-   C89
   161    165    167    168      3   30.33400    0.00000  -30.33400    0.00000    0.00000    0.00000 ;    C90-   C89-   C86-   O16
   162    161    165    166      3   30.33400    0.00000  -30.33400    0.00000    0.00000    0.00000 ;    C92-   C90-   C89-   H43
   162    161    165    167      3   30.33400    0.00000  -30.33400    0.00000    0.00000    0.00000 ;    C92-   C90-   C89-   C86
   163    162    161    165      3   30.33400    0.00000  -30.33400    0.00000    0.00000    0.00000 ;    O23-   C92-   C90-   C89
   164    162    161    165      3   30.33400    0.00000  -30.33400    0.00000    0.00000    0.00000 ;    O24-   C92-   C90-   C89
   165    167    168    169      3    7.53120    0.00000   -7.53120    0.00000    0.00000    0.00000 ;    C89-   C86-   O16-   C46
   166    165    167    168      3   30.33400    0.00000  -30.33400    0.00000    0.00000    0.00000 ;    H43-   C89-   C86-   O16
   167    168    169    170      3    7.53120    0.00000   -7.53120    0.00000    0.00000    0.00000 ;    C86-   O16-   C46-   C42
   168    169    170    171      3   30.33400    0.00000  -30.33400    0.00000    0.00000    0.00000 ;    O16-   C46-   C42-   H27
   168    169    170    172      3   30.33400    0.00000  -30.33400    0.00000    0.00000    0.00000 ;    O16-   C46-   C42-   C45
   169    170    172    173      3   30.33400    0.00000  -30.33400    0.00000    0.00000    0.00000 ;    C46-   C42-   C45-    O9
   170    172    173    174      3    7.53120    0.00000   -7.53120    0.00000    0.00000    0.00000 ;    C42-   C45-    O9-   C83
   171    170    172    173      3   30.33400    0.00000  -30.33400    0.00000    0.00000    0.00000 ;    H27-   C42-   C45-    O9
   172    173    174    175      3    7.53120    0.00000   -7.53120    0.00000    0.00000    0.00000 ;    C45-    O9-   C83-   C82
   172    173    174    177      3    7.53120    0.00000   -7.53120    0.00000    0.00000    0.00000 ;    C45-    O9-   C83-   C80
   173    174    175    176      3   30.33400    0.00000  -30.33400    0.00000    0.00000    0.00000 ;     O9-   C83-   C82-   H46
   173    174    175    185      3   30.33400    0.00000  -30.33400    0.00000    0.00000    0.00000 ;     O9-   C83-   C82-   C79
   173    174    177    178      3   30.33400    0.00000  -30.33400    0.00000    0.00000    0.00000 ;     O9-   C83-   C80-   H42
   173    174    177    179      3   30.33400    0.00000  -30.33400    0.00000    0.00000    0.00000 ;     O9-   C83-   C80-   C84
   174    175    185    183      3   30.33400    0.00000  -30.33400    0.00000    0.00000    0.00000 ;    C83-   C82-   C79-   C81
   174    175    185    186      3   30.33400    0.00000  -30.33400    0.00000    0.00000    0.00000 ;    C83-   C82-   C79-   O12
   174    177    179    180      3   30.33400    0.00000  -30.33400    0.00000    0.00000    0.00000 ;    C83-   C80-   C84-   C85
   174    177    179    183      3   30.33400    0.00000  -30.33400    0.00000    0.00000    0.00000 ;    C83-   C80-   C84-   C81
   175    174    177    178      3   30.33400    0.00000  -30.33400    0.00000    0.00000    0.00000 ;    C82-   C83-   C80-   H42
   175    174    177    179      3   30.33400    0.00000  -30.33400    0.00000    0.00000    0.00000 ;    C82-   C83-   C80-   C84
   175    185    183    179      3   30.33400    0.00000  -30.33400    0.00000    0.00000    0.00000 ;    C82-   C79-   C81-   C84
   175    185    183    184      3   30.33400    0.00000  -30.33400    0.00000    0.00000    0.00000 ;    C82-   C79-   C81-   H41
   176    175    174    177      3   30.33400    0.00000  -30.33400    0.00000    0.00000    0.00000 ;    H46-   C82-   C83-   C80
   176    175    185    183      3   30.33400    0.00000  -30.33400    0.00000    0.00000    0.00000 ;    H46-   C82-   C79-   C81
   176    175    185    186      3   30.33400    0.00000  -30.33400    0.00000    0.00000    0.00000 ;    H46-   C82-   C79-   O12
   177    174    175    185      3   30.33400    0.00000  -30.33400    0.00000    0.00000    0.00000 ;    C80-   C83-   C82-   C79
   177    179    180    181      3   30.33400    0.00000  -30.33400    0.00000    0.00000    0.00000 ;    C80-   C84-   C85-   O17
   177    179    180    182      3   30.33400    0.00000  -30.33400    0.00000    0.00000    0.00000 ;    C80-   C84-   C85-   O18
   177    179    183    184      3   30.33400    0.00000  -30.33400    0.00000    0.00000    0.00000 ;    C80-   C84-   C81-   H41
   177    179    183    185      3   30.33400    0.00000  -30.33400    0.00000    0.00000    0.00000 ;    C80-   C84-   C81-   C79
   178    177    179    180      3   30.33400    0.00000  -30.33400    0.00000    0.00000    0.00000 ;    H42-   C80-   C84-   C85
   178    177    179    183      3   30.33400    0.00000  -30.33400    0.00000    0.00000    0.00000 ;    H42-   C80-   C84-   C81
   179    183    185    186      3   30.33400    0.00000  -30.33400    0.00000    0.00000    0.00000 ;    C84-   C81-   C79-   O12
   180    179    183    184      3   30.33400    0.00000  -30.33400    0.00000    0.00000    0.00000 ;    C85-   C84-   C81-   H41
   180    179    183    185      3   30.33400    0.00000  -30.33400    0.00000    0.00000    0.00000 ;    C85-   C84-   C81-   C79
   181    180    179    183      3   30.33400    0.00000  -30.33400    0.00000    0.00000    0.00000 ;    O17-   C85-   C84-   C81
   182    180    179    183      3   30.33400    0.00000  -30.33400    0.00000    0.00000    0.00000 ;    O18-   C85-   C84-   C81
   184    183    185    186      3   30.33400    0.00000  -30.33400    0.00000    0.00000    0.00000 ;    H41-   C81-   C79-   O12

[ dihedrals ] ; impropers
; treated as propers in GROMACS to use correct AMBER analytical function
;    i      j      k      l   func   phase     kd      pn
     4      1      2      3      1   180.00   4.60240   2 ;    C30-   O29-   C93-   O30
    10     13     12     35      1   180.00   4.60240   2 ;     C8-    C2-    C5-    C4
    10     45     48     49      1   180.00   4.60240   2 ;     C8-   C18-   C15-   C17
    12     15     13     14      1   180.00   4.60240   2 ;     C5-    C6-    C2-    H2
    12     33     35     36      1   180.00   4.60240   2 ;     C5-    C1-    C4-    O7
    15     33     31     32      1   180.00   4.60240   2 ;     C6-    C1-    C3-    O4
    16     13     15     31      1   180.00   4.60240   2 ;     C7-    C2-    C6-    C3
    16     19     18    106      1   180.00   4.60240   2 ;     C7-   C12-    C9-   C11
    18    102     19     20      1   180.00   4.60240   2 ;     C9-   C13-   C12-    H5
    18    104    106    107      1   180.00   4.60240   2 ;     C9-   C14-   C11-    O5
    23     27     26     28      1   180.00   4.60240   2 ;    C32-   O31-   C96-   O32
    31     35     33     34      1   180.00   4.60240   2 ;     C3-    C4-    C1-    H1
    37     40     39     42      1   180.00   4.60240   2 ;    C39-   C43-   C41-   C44
    39    169     40     41      1   180.00   4.60240   2 ;    C41-   C46-   C43-   H25
    39    172     42     43      1   180.00   4.60240   2 ;    C41-   C45-   C44-   H26
    40    170    169    168      1   180.00   4.60240   2 ;    C43-   C42-   C46-   O16
    42    170    172    173      1   180.00   4.60240   2 ;    C44-   C42-   C45-    O9
    45     64     46     47      1   180.00   4.60240   2 ;    C18-   C16-   C19-    H8
    46     48     45     44      1   180.00   4.60240   2 ;    C19-   C15-   C18-    O8
    46     51     64     65      1   180.00   4.60240   2 ;    C19-   C20-   C16-    O2
    48     51     49     50      1   180.00   4.60240   2 ;    C15-   C20-   C17-    H7
    52     49     51     64      1   180.00   4.60240   2 ;    C21-   C17-   C20-   C16
    52     74     87     88      1   180.00   4.60240   2 ;    C21-   C24-   C27-   C26
    56     60     59     61      1   180.00   4.60240   2 ;    C36-   O27-   C94-   O28
    66     69     68     71      1   180.00   4.60240   2 ;    C40-   C49-   C47-   C50
    68    151     71     72      1   180.00   4.60240   2 ;    C47-   C51-   C50-   H29
    68    154     69     70      1   180.00   4.60240   2 ;    C47-   C52-   C49-   H28
    69    152    154    155      1   180.00   4.60240   2 ;    C49-   C48-   C52-   O10
    71    152    151    150      1   180.00   4.60240   2 ;    C50-   C48-   C51-   O11
    74     76     75     86      1   180.00   4.60240   2 ;    C24-   C25-   C28-   H12
    75     87     74     73      1   180.00   4.60240   2 ;    C28-   C27-   C24-    O1
    75     90     76     77      1   180.00   4.60240   2 ;    C28-   C23-   C25-    O3
    78     82     81     84      1   180.00   4.60240   2 ;    C38-   C55-   C53-   C56
    81    133     84     85      1   180.00   4.60240   2 ;    C53-   C57-   C56-   H32
    81    136     82     83      1   180.00   4.60240   2 ;    C53-   C58-   C55-   H31
    82    134    136    137      1   180.00   4.60240   2 ;    C55-   C54-   C58-   O13
    84    134    133    132      1   180.00   4.60240   2 ;    C56-   C54-   C57-   O14
    87     90     88     89      1   180.00   4.60240   2 ;    C27-   C23-   C26-   H11
    91     19    102    103      1   180.00   4.60240   2 ;    C22-   C12-   C13-   C10
    91     76     90     88      1   180.00   4.60240   2 ;    C22-   C25-   C23-   C26
    95     99     98    100      1   180.00   4.60240   2 ;    C34-   O25-   C95-   O26
   102    104    103     79      1   180.00   4.60240   2 ;    C13-   C14-   C10-    O6
   103    106    104    105      1   180.00   4.60240   2 ;    C10-   C11-   C14-    H6
   110    115    113    114      1   180.00   4.60240   2 ;    C59-   C64-   C61-   H34
   110    118    111    112      1   180.00   4.60240   2 ;    C59-   C63-   C62-   H35
   111    113    110    108      1   180.00   4.60240   2 ;    C62-   C61-   C59-   C37
   111    116    118    119      1   180.00   4.60240   2 ;    C62-   C60-   C63-   O15
   113    116    115    186      1   180.00   4.60240   2 ;    C61-   C60-   C64-   O12
   115    118    116    117      1   180.00   4.60240   2 ;    C64-   C63-   C60-   H36
   120    125    123    124      1   180.00   4.60240   2 ;    C77-   C76-   C73-   H40
   120    131    121    122      1   180.00   4.60240   2 ;    C77-   C72-   C74-   H45
   121    123    120    119      1   180.00   4.60240   2 ;    C74-   C73-   C77-   O15
   121    129    131    132      1   180.00   4.60240   2 ;    C74-   C75-   C72-   O14
   125    127    126    128      1   180.00   4.60240   2 ;    C76-   O19-   C78-   O20
   125    131    129    130      1   180.00   4.60240   2 ;    C76-   C72-   C75-   H39
   126    123    125    129      1   180.00   4.60240   2 ;    C78-   C73-   C76-   C75
   133    136    134    135      1   180.00   4.60240   2 ;    C57-   C58-   C54-   H33
   138    143    141    142      1   180.00   4.60240   2 ;    C70-   C69-   C66-   H38
   138    149    139    140      1   180.00   4.60240   2 ;    C70-   C65-   C67-   H48
   139    141    138    137      1   180.00   4.60240   2 ;    C67-   C66-   C70-   O13
   139    147    149    150      1   180.00   4.60240   2 ;    C67-   C68-   C65-   O11
   143    145    144    146      1   180.00   4.60240   2 ;    C69-   O21-   C71-   O22
   143    149    147    148      1   180.00   4.60240   2 ;    C69-   C65-   C68-   H37
   144    141    143    147      1   180.00   4.60240   2 ;    C71-   C66-   C69-   C68
   151    154    152    153      1   180.00   4.60240   2 ;    C51-   C52-   C48-   H30
   156    161    159    160      1   180.00   4.60240   2 ;    C91-   C90-   C87-   H44
   156    167    157    158      1   180.00   4.60240   2 ;    C91-   C86-   C88-   H47
   157    159    156    155      1   180.00   4.60240   2 ;    C88-   C87-   C91-   O10
   157    165    167    168      1   180.00   4.60240   2 ;    C88-   C89-   C86-   O16
   161    163    162    164      1   180.00   4.60240   2 ;    C90-   O23-   C92-   O24
   161    167    165    166      1   180.00   4.60240   2 ;    C90-   C86-   C89-   H43
   162    159    161    165      1   180.00   4.60240   2 ;    C92-   C87-   C90-   C89
   169    172    170    171      1   180.00   4.60240   2 ;    C46-   C45-   C42-   H27
   174    179    177    178      1   180.00   4.60240   2 ;    C83-   C84-   C80-   H42
   174    185    175    176      1   180.00   4.60240   2 ;    C83-   C79-   C82-   H46
   175    177    174    173      1   180.00   4.60240   2 ;    C82-   C80-   C83-    O9
   175    183    185    186      1   180.00   4.60240   2 ;    C82-   C81-   C79-   O12
   179    181    180    182      1   180.00   4.60240   2 ;    C84-   O17-   C85-   O18
   179    185    183    184      1   180.00   4.60240   2 ;    C84-   C79-   C81-   H41
   180    177    179    183      1   180.00   4.60240   2 ;    C85-   C80-   C84-   C81
 
