# Supplementary material for: Emergence of non-monotonic deep cavity cavitand assembly with increasing portal methylation
Source: Royal Society of Chemistry journal article supplement (doi:10.1039/c9me00076c), 2019-09-27
Supplement: c9me00076c5.top [file c9me00076c5.top]

[ defaults ]
; nbfunc        comb-rule       gen-pairs       fudgeLJ fudgeQQ
  1               2               yes             0.5     0.8333

[ atomtypes ]
;name   bond_type     mass     charge   ptype   sigma         epsilon       Amb
 o        o           0.00000  0.00000   A     2.95992e-01   8.78640e-01 ; 1.66  0.2100
 c        c           0.00000  0.00000   A     3.39967e-01   3.59824e-01 ; 1.91  0.0860
 oh       oh          0.00000  0.00000   A     3.06647e-01   8.80314e-01 ; 1.72  0.2104
 ho       ho          0.00000  0.00000   A     0.00000e+00   0.00000e+00 ; 0.00  0.0000
 c3       c3          0.00000  0.00000   A     3.39967e-01   4.57730e-01 ; 1.91  0.1094
 hc       hc          0.00000  0.00000   A     2.64953e-01   6.56888e-02 ; 1.49  0.0157
 ca       ca          0.00000  0.00000   A     3.39967e-01   3.59824e-01 ; 1.91  0.0860
 ha       ha          0.00000  0.00000   A     2.59964e-01   6.27600e-02 ; 1.46  0.0150
 os       os          0.00000  0.00000   A     3.00001e-01   7.11280e-01 ; 1.68  0.1700
 h2       h2          0.00000  0.00000   A     2.29317e-01   6.56888e-02 ; 1.29  0.0157

[ moleculetype ]
;name            nrexcl
 temoa1              3

[ atoms ]
;   nr  type  resi  res  atom  cgnr     charge      mass       ; qtot   bond_type
     1    o     1   MOL    O1    1    -0.581001     16.00000 ; qtot -0.581
     2    c     1   MOL    C1    2     0.632601     12.01000 ; qtot 0.052
     3   oh     1   MOL    O2    3    -0.622601     16.00000 ; qtot -0.571
     4   ho     1   MOL    H1    4     0.514501      1.00800 ; qtot -0.057
     5   c3     1   MOL    C2    5    -0.133400     12.01000 ; qtot -0.190
     6   hc     1   MOL    H2    6     0.070950      1.00800 ; qtot -0.119
     7   hc     1   MOL    H3    7     0.070950      1.00800 ; qtot -0.048
     8   c3     1   MOL    C3    8    -0.073400     12.01000 ; qtot -0.121
     9   hc     1   MOL    H4    9     0.064700      1.00800 ; qtot -0.057
    10   hc     1   MOL    H5   10     0.064700      1.00800 ; qtot 0.008
    11   c3     1   MOL    C4   11     0.026400     12.01000 ; qtot 0.034
    12   hc     1   MOL    H6   12     0.086700      1.00800 ; qtot 0.121
    13   ca     1   MOL    C5   13    -0.085550     12.01000 ; qtot 0.036
    14   ca     1   MOL    C6   14    -0.100250     12.01000 ; qtot -0.065
    15   ha     1   MOL    H7   15     0.163500      1.00800 ; qtot 0.099
    16   ca     1   MOL    C7   16    -0.085550     12.01000 ; qtot 0.013
    17   ca     1   MOL    C8   17    -0.100250     12.01000 ; qtot -0.087
    18   ha     1   MOL    H8   18     0.163500      1.00800 ; qtot 0.077
    19   ca     1   MOL    C9   19    -0.062050     12.01000 ; qtot 0.014
    20   c3     1   MOL   C10   20     0.011900     12.01000 ; qtot 0.026
    21   c3     1   MOL   C11   21    -0.062900     12.01000 ; qtot -0.037
    22   c3     1   MOL   C12   22    -0.187400     12.01000 ; qtot -0.224
    23    c     1   MOL   C13   23     0.917602     12.01000 ; qtot 0.694
    24    o     1   MOL    O3   24    -0.869051     16.00000 ; qtot -0.175
    25    o     1   MOL    O4   25    -0.869051     16.00000 ; qtot -1.044
    26   hc     1   MOL    H9   26     0.032700      1.00800 ; qtot -1.012
    27   hc     1   MOL   H10   27     0.032700      1.00800 ; qtot -0.979
    28   hc     1   MOL   H11   28     0.055450      1.00800 ; qtot -0.924
    29   hc     1   MOL   H12   29     0.055450      1.00800 ; qtot -0.868
    30   hc     1   MOL   H13   30     0.096200      1.00800 ; qtot -0.772
    31   ca     1   MOL   C14   31    -0.062050     12.01000 ; qtot -0.834
    32   ca     1   MOL   C15   32    -0.100250     12.01000 ; qtot -0.934
    33   ha     1   MOL   H14   33     0.163500      1.00800 ; qtot -0.771
    34   ca     1   MOL   C16   34    -0.085550     12.01000 ; qtot -0.856
    35   c3     1   MOL   C17   35     0.026400     12.01000 ; qtot -0.830
    36   hc     1   MOL   H15   36     0.086700      1.00800 ; qtot -0.743
    37   c3     1   MOL   C18   37    -0.073400     12.01000 ; qtot -0.817
    38   hc     1   MOL   H16   38     0.064700      1.00800 ; qtot -0.752
    39   c3     1   MOL   C19   39    -0.133400     12.01000 ; qtot -0.885
    40   hc     1   MOL   H17   40     0.070950      1.00800 ; qtot -0.814
    41   hc     1   MOL   H18   41     0.070950      1.00800 ; qtot -0.743
    42    c     1   MOL   C20   42     0.632601     12.01000 ; qtot -0.111
    43    o     1   MOL    O5   43    -0.581001     16.00000 ; qtot -0.692
    44   oh     1   MOL    O6   44    -0.622601     16.00000 ; qtot -1.314
    45   ho     1   MOL   H19   45     0.514501      1.00800 ; qtot -0.800
    46   hc     1   MOL   H20   46     0.064700      1.00800 ; qtot -0.735
    47   ca     1   MOL   C21   47    -0.085550     12.01000 ; qtot -0.821
    48   ca     1   MOL   C22   48    -0.100250     12.01000 ; qtot -0.921
    49   ha     1   MOL   H21   49     0.163500      1.00800 ; qtot -0.757
    50   ca     1   MOL   C23   50    -0.062050     12.01000 ; qtot -0.820
    51   c3     1   MOL   C24   51     0.011900     12.01000 ; qtot -0.808
    52   hc     1   MOL   H22   52     0.096200      1.00800 ; qtot -0.711
    53   c3     1   MOL   C25   53    -0.062900     12.01000 ; qtot -0.774
    54   hc     1   MOL   H23   54     0.055450      1.00800 ; qtot -0.719
    55   c3     1   MOL   C26   55    -0.187400     12.01000 ; qtot -0.906
    56   hc     1   MOL   H24   56     0.032700      1.00800 ; qtot -0.874
    57   hc     1   MOL   H25   57     0.032700      1.00800 ; qtot -0.841
    58    c     1   MOL   C27   58     0.917602     12.01000 ; qtot 0.077
    59    o     1   MOL    O7   59    -0.869051     16.00000 ; qtot -0.792
    60    o     1   MOL    O8   60    -0.869051     16.00000 ; qtot -1.661
    61   hc     1   MOL   H26   61     0.055450      1.00800 ; qtot -1.606
    62   ca     1   MOL   C28   62    -0.062050     12.01000 ; qtot -1.668
    63   ca     1   MOL   C29   63     0.081600     12.01000 ; qtot -1.586
    64   os     1   MOL    O9   64    -0.332900     16.00000 ; qtot -1.919
    65   ca     1   MOL   C30   65    -0.153500     12.01000 ; qtot -2.073
    66   ha     1   MOL   H27   66     0.157000      1.00800 ; qtot -1.916
    67   ca     1   MOL   C31   67     0.077850     12.01000 ; qtot -1.838
    68   os     1   MOL   O10   68    -0.338400     16.00000 ; qtot -2.176
    69   c3     1   MOL   C32   69     0.370200     12.01000 ; qtot -1.806
    70   h2     1   MOL   H28   70     0.069700      1.00800 ; qtot -1.736
    71   os     1   MOL   O11   71    -0.338400     16.00000 ; qtot -2.075
    72   ca     1   MOL   C33   72     0.077850     12.01000 ; qtot -1.997
    73   ca     1   MOL   C34   73    -0.153500     12.01000 ; qtot -2.151
    74   ha     1   MOL   H29   74     0.157000      1.00800 ; qtot -1.994
    75   ca     1   MOL   C35   75     0.081600     12.01000 ; qtot -1.912
    76   os     1   MOL   O12   76    -0.332900     16.00000 ; qtot -2.245
    77   c3     1   MOL   C36   77     0.370200     12.01000 ; qtot -1.875
    78   h2     1   MOL   H30   78     0.066700      1.00800 ; qtot -1.808
    79   os     1   MOL   O13   79    -0.332900     16.00000 ; qtot -2.141
    80   ca     1   MOL   C37   80     0.081600     12.01000 ; qtot -2.059
    81   ca     1   MOL   C38   81    -0.153500     12.01000 ; qtot -2.213
    82   ha     1   MOL   H31   82     0.157000      1.00800 ; qtot -2.056
    83   ca     1   MOL   C39   83     0.077850     12.01000 ; qtot -1.978
    84   os     1   MOL   O14   84    -0.338400     16.00000 ; qtot -2.316
    85   c3     1   MOL   C40   85     0.370200     12.01000 ; qtot -1.946
    86   h2     1   MOL   H32   86     0.069700      1.00800 ; qtot -1.876
    87   os     1   MOL   O15   87    -0.338400     16.00000 ; qtot -2.215
    88   ca     1   MOL   C41   88     0.077850     12.01000 ; qtot -2.137
    89   ca     1   MOL   C42   89    -0.153500     12.01000 ; qtot -2.290
    90   ha     1   MOL   H33   90     0.157000      1.00800 ; qtot -2.133
    91   ca     1   MOL   C43   91     0.081600     12.01000 ; qtot -2.052
    92   os     1   MOL   O16   92    -0.332900     16.00000 ; qtot -2.385
    93   c3     1   MOL   C44   93     0.370200     12.01000 ; qtot -2.015
    94   h2     1   MOL   H34   94     0.066700      1.00800 ; qtot -1.948
    95   ca     1   MOL   C45   95    -0.032300     12.01000 ; qtot -1.980
    96   ca     1   MOL   C46   96    -0.190250     12.01000 ; qtot -2.170
    97   ha     1   MOL   H35   97     0.164500      1.00800 ; qtot -2.006
    98   ca     1   MOL   C47   98    -0.190250     12.01000 ; qtot -2.196
    99   ha     1   MOL   H36   99     0.164500      1.00800 ; qtot -2.032
   100   ca     1   MOL   C48  100     0.147600     12.01000 ; qtot -1.884
   101   os     1   MOL   O17  101    -0.262450     16.00000 ; qtot -2.146
   102   ca     1   MOL   C49  102    -0.196000     12.01000 ; qtot -2.342
   103   ha     1   MOL   H37  103     0.150000      1.00800 ; qtot -2.192
   104   ca     1   MOL   C50  104     0.147600     12.01000 ; qtot -2.045
   105   os     1   MOL   O18  105    -0.262450     16.00000 ; qtot -2.307
   106   ca     1   MOL   C51  106     0.062350     12.01000 ; qtot -2.245
   107   ca     1   MOL   C52  107    -0.099000     12.01000 ; qtot -2.344
   108   ca     1   MOL   C53  108    -0.119600     12.01000 ; qtot -2.464
   109   ca     1   MOL   C54  109    -0.100500     12.01000 ; qtot -2.564
   110   ha     1   MOL   H38  110     0.166500      1.00800 ; qtot -2.398
   111    c     1   MOL   C55  111     0.911451     12.01000 ; qtot -1.486
   112    o     1   MOL   O19  112    -0.837926     16.00000 ; qtot -2.324
   113    o     1   MOL   O20  113    -0.837926     16.00000 ; qtot -3.162
   114   ha     1   MOL   H39  114     0.167250      1.00800 ; qtot -2.995
   115   ca     1   MOL   C56  115    -0.114050     12.01000 ; qtot -3.109
   116   c3     1   MOL   C57  116    -0.050800     12.01000 ; qtot -3.160
   117   hc     1   MOL   H40  117     0.046367      1.00800 ; qtot -3.113
   118   hc     1   MOL   H41  118     0.046367      1.00800 ; qtot -3.067
   119   hc     1   MOL   H42  119     0.046367      1.00800 ; qtot -3.020
   120   ca     1   MOL   C58  120     0.061600     12.01000 ; qtot -2.959
   121   os     1   MOL   O21  121    -0.262700     16.00000 ; qtot -3.222
   122   ca     1   MOL   C59  122     0.148350     12.01000 ; qtot -3.073
   123   ca     1   MOL   C60  123    -0.196500     12.01000 ; qtot -3.270
   124   ha     1   MOL   H43  124     0.151000      1.00800 ; qtot -3.119
   125   ca     1   MOL   C61  125    -0.191000     12.01000 ; qtot -3.310
   126   ha     1   MOL   H44  126     0.163750      1.00800 ; qtot -3.146
   127   ca     1   MOL   C62  127    -0.034800     12.01000 ; qtot -3.181
   128   ca     1   MOL   C63  128    -0.191000     12.01000 ; qtot -3.372
   129   ha     1   MOL   H45  129     0.163750      1.00800 ; qtot -3.208
   130   ca     1   MOL   C64  130     0.148350     12.01000 ; qtot -3.060
   131   os     1   MOL   O22  131    -0.262700     16.00000 ; qtot -3.322
   132   ca     1   MOL   C65  132     0.061600     12.01000 ; qtot -3.261
   133   ca     1   MOL   C66  133    -0.100500     12.01000 ; qtot -3.361
   134   ca     1   MOL   C67  134    -0.119600     12.01000 ; qtot -3.481
   135   ca     1   MOL   C68  135    -0.099000     12.01000 ; qtot -3.580
   136   ha     1   MOL   H46  136     0.167250      1.00800 ; qtot -3.413
   137    c     1   MOL   C69  137     0.911451     12.01000 ; qtot -2.501
   138    o     1   MOL   O23  138    -0.837926     16.00000 ; qtot -3.339
   139    o     1   MOL   O24  139    -0.837926     16.00000 ; qtot -4.177
   140   ha     1   MOL   H47  140     0.166500      1.00800 ; qtot -4.011
   141   ca     1   MOL   C70  141    -0.114050     12.01000 ; qtot -4.125
   142   c3     1   MOL   C71  142    -0.050800     12.01000 ; qtot -4.175
   143   hc     1   MOL   H48  143     0.046367      1.00800 ; qtot -4.129
   144   hc     1   MOL   H49  144     0.046367      1.00800 ; qtot -4.083
   145   hc     1   MOL   H50  145     0.046367      1.00800 ; qtot -4.036
   146   ca     1   MOL   C72  146     0.062350     12.01000 ; qtot -3.974
   147   os     1   MOL   O25  147    -0.262450     16.00000 ; qtot -4.236
   148   ca     1   MOL   C73  148     0.147600     12.01000 ; qtot -4.089
   149   ca     1   MOL   C74  149    -0.196000     12.01000 ; qtot -4.285
   150   ha     1   MOL   H51  150     0.150000      1.00800 ; qtot -4.135
   151   ca     1   MOL   C75  151    -0.190250     12.01000 ; qtot -4.325
   152   ha     1   MOL   H52  152     0.164500      1.00800 ; qtot -4.161
   153   ca     1   MOL   C76  153    -0.032300     12.01000 ; qtot -4.193
   154   ca     1   MOL   C77  154    -0.190250     12.01000 ; qtot -4.383
   155   ha     1   MOL   H53  155     0.164500      1.00800 ; qtot -4.219
   156   ca     1   MOL   C78  156     0.147600     12.01000 ; qtot -4.071
   157   os     1   MOL   O26  157    -0.262450     16.00000 ; qtot -4.333
   158   ca     1   MOL   C79  158     0.062350     12.01000 ; qtot -4.271
   159   ca     1   MOL   C80  159    -0.099000     12.01000 ; qtot -4.370
   160   ca     1   MOL   C81  160    -0.119600     12.01000 ; qtot -4.490
   161   ca     1   MOL   C82  161    -0.100500     12.01000 ; qtot -4.590
   162   ha     1   MOL   H54  162     0.166500      1.00800 ; qtot -4.424
   163    c     1   MOL   C83  163     0.911451     12.01000 ; qtot -3.512
   164    o     1   MOL   O27  164    -0.837926     16.00000 ; qtot -4.350
   165    o     1   MOL   O28  165    -0.837926     16.00000 ; qtot -5.188
   166   ha     1   MOL   H55  166     0.167250      1.00800 ; qtot -5.021
   167   ca     1   MOL   C84  167    -0.114050     12.01000 ; qtot -5.135
   168   c3     1   MOL   C85  168    -0.050800     12.01000 ; qtot -5.186
   169   hc     1   MOL   H56  169     0.046367      1.00800 ; qtot -5.139
   170   hc     1   MOL   H57  170     0.046367      1.00800 ; qtot -5.093
   171   hc     1   MOL   H58  171     0.046367      1.00800 ; qtot -5.047
   172   ca     1   MOL   C86  172     0.061600     12.01000 ; qtot -4.985
   173   os     1   MOL   O29  173    -0.262700     16.00000 ; qtot -5.248
   174   ca     1   MOL   C87  174     0.148350     12.01000 ; qtot -5.099
   175   ca     1   MOL   C88  175    -0.196500     12.01000 ; qtot -5.296
   176   ha     1   MOL   H59  176     0.151000      1.00800 ; qtot -5.145
   177   ca     1   MOL   C89  177    -0.191000     12.01000 ; qtot -5.336
   178   ha     1   MOL   H60  178     0.163750      1.00800 ; qtot -5.172
   179   ca     1   MOL   C90  179    -0.034800     12.01000 ; qtot -5.207
   180   ca     1   MOL   C91  180    -0.191000     12.01000 ; qtot -5.398
   181   ha     1   MOL   H61  181     0.163750      1.00800 ; qtot -5.234
   182   ca     1   MOL   C92  182     0.148350     12.01000 ; qtot -5.086
   183   os     1   MOL   O30  183    -0.262700     16.00000 ; qtot -5.348
   184   ca     1   MOL   C93  184     0.061600     12.01000 ; qtot -5.287
   185   ca     1   MOL   C94  185    -0.100500     12.01000 ; qtot -5.387
   186   ha     1   MOL   H62  186     0.166500      1.00800 ; qtot -5.221
   187   ca     1   MOL   C95  187    -0.114050     12.01000 ; qtot -5.335
   188   c3     1   MOL   C96  188    -0.050800     12.01000 ; qtot -5.386
   189   hc     1   MOL   H63  189     0.046367      1.00800 ; qtot -5.339
   190   hc     1   MOL   H64  190     0.046367      1.00800 ; qtot -5.293
   191   hc     1   MOL   H65  191     0.046367      1.00800 ; qtot -5.247
   192   ca     1   MOL   C97  192     0.062350     12.01000 ; qtot -5.184
   193   ca     1   MOL   C98  193    -0.099000     12.01000 ; qtot -5.283
   194   ha     1   MOL   H66  194     0.167250      1.00800 ; qtot -5.116
   195   ca     1   MOL   C99  195    -0.119600     12.01000 ; qtot -5.236
   196    c     1   MOL  C100  196     0.911451     12.01000 ; qtot -4.324
   197    o     1   MOL   O31  197    -0.837926     16.00000 ; qtot -5.162
   198    o     1   MOL   O32  198    -0.837926     16.00000 ; qtot -6.000

[ bonds ]
;   ai     aj funct   r             k
     1      2   1    1.2140e-01    5.4225e+05 ;     O1 - C1    
     2      3   1    1.3060e-01    3.9028e+05 ;     C1 - O2    
     2      5   1    1.5080e-01    2.7472e+05 ;     C1 - C2    
     3      4   1    9.7400e-02    3.0928e+05 ;     O2 - H1    
     5      6   1    1.0920e-01    2.8225e+05 ;     C2 - H2    
     5      7   1    1.0920e-01    2.8225e+05 ;     C2 - H3    
     5      8   1    1.5350e-01    2.5363e+05 ;     C2 - C3    
     8      9   1    1.0920e-01    2.8225e+05 ;     C3 - H4    
     8     10   1    1.0920e-01    2.8225e+05 ;     C3 - H5    
     8     11   1    1.5350e-01    2.5363e+05 ;     C3 - C4    
    11     12   1    1.0920e-01    2.8225e+05 ;     C4 - H6    
    11     13   1    1.5130e-01    2.7070e+05 ;     C4 - C5    
    11     16   1    1.5130e-01    2.7070e+05 ;     C4 - C7    
    13     14   1    1.3870e-01    4.0033e+05 ;     C5 - C6    
    13     67   1    1.3870e-01    4.0033e+05 ;     C5 - C31   
    14     15   1    1.0870e-01    2.8811e+05 ;     C6 - H7    
    14     62   1    1.3870e-01    4.0033e+05 ;     C6 - C28   
    16     17   1    1.3870e-01    4.0033e+05 ;     C7 - C8    
    16     72   1    1.3870e-01    4.0033e+05 ;     C7 - C33   
    17     18   1    1.0870e-01    2.8811e+05 ;     C8 - H8    
    17     19   1    1.3870e-01    4.0033e+05 ;     C8 - C9    
    19     20   1    1.5130e-01    2.7070e+05 ;     C9 - C10   
    19     75   1    1.3870e-01    4.0033e+05 ;     C9 - C35   
    20     21   1    1.5350e-01    2.5363e+05 ;    C10 - C11   
    20     30   1    1.0920e-01    2.8225e+05 ;    C10 - H13   
    20     31   1    1.5130e-01    2.7070e+05 ;    C10 - C14   
    21     22   1    1.5350e-01    2.5363e+05 ;    C11 - C12   
    21     28   1    1.0920e-01    2.8225e+05 ;    C11 - H11   
    21     29   1    1.0920e-01    2.8225e+05 ;    C11 - H12   
    22     23   1    1.5080e-01    2.7472e+05 ;    C12 - C13   
    22     26   1    1.0920e-01    2.8225e+05 ;    C12 - H9    
    22     27   1    1.0920e-01    2.8225e+05 ;    C12 - H10   
    23     24   1    1.2140e-01    5.4225e+05 ;    C13 - O3    
    23     25   1    1.2140e-01    5.4225e+05 ;    C13 - O4    
    31     32   1    1.3870e-01    4.0033e+05 ;    C14 - C15   
    31     80   1    1.3870e-01    4.0033e+05 ;    C14 - C37   
    32     33   1    1.0870e-01    2.8811e+05 ;    C15 - H14   
    32     34   1    1.3870e-01    4.0033e+05 ;    C15 - C16   
    34     35   1    1.5130e-01    2.7070e+05 ;    C16 - C17   
    34     83   1    1.3870e-01    4.0033e+05 ;    C16 - C39   
    35     36   1    1.0920e-01    2.8225e+05 ;    C17 - H15   
    35     37   1    1.5350e-01    2.5363e+05 ;    C17 - C18   
    35     47   1    1.5130e-01    2.7070e+05 ;    C17 - C21   
    37     38   1    1.0920e-01    2.8225e+05 ;    C18 - H16   
    37     39   1    1.5350e-01    2.5363e+05 ;    C18 - C19   
    37     46   1    1.0920e-01    2.8225e+05 ;    C18 - H20   
    39     40   1    1.0920e-01    2.8225e+05 ;    C19 - H17   
    39     41   1    1.0920e-01    2.8225e+05 ;    C19 - H18   
    39     42   1    1.5080e-01    2.7472e+05 ;    C19 - C20   
    42     43   1    1.2140e-01    5.4225e+05 ;    C20 - O5    
    42     44   1    1.3060e-01    3.9028e+05 ;    C20 - O6    
    44     45   1    9.7400e-02    3.0928e+05 ;     O6 - H19   
    47     48   1    1.3870e-01    4.0033e+05 ;    C21 - C22   
    47     88   1    1.3870e-01    4.0033e+05 ;    C21 - C41   
    48     49   1    1.0870e-01    2.8811e+05 ;    C22 - H21   
    48     50   1    1.3870e-01    4.0033e+05 ;    C22 - C23   
    50     51   1    1.5130e-01    2.7070e+05 ;    C23 - C24   
    50     91   1    1.3870e-01    4.0033e+05 ;    C23 - C43   
    51     52   1    1.0920e-01    2.8225e+05 ;    C24 - H22   
    51     53   1    1.5350e-01    2.5363e+05 ;    C24 - C25   
    51     62   1    1.5130e-01    2.7070e+05 ;    C24 - C28   
    53     54   1    1.0920e-01    2.8225e+05 ;    C25 - H23   
    53     55   1    1.5350e-01    2.5363e+05 ;    C25 - C26   
    53     61   1    1.0920e-01    2.8225e+05 ;    C25 - H26   
    55     56   1    1.0920e-01    2.8225e+05 ;    C26 - H24   
    55     57   1    1.0920e-01    2.8225e+05 ;    C26 - H25   
    55     58   1    1.5080e-01    2.7472e+05 ;    C26 - C27   
    58     59   1    1.2140e-01    5.4225e+05 ;    C27 - O7    
    58     60   1    1.2140e-01    5.4225e+05 ;    C27 - O8    
    62     63   1    1.3870e-01    4.0033e+05 ;    C28 - C29   
    63     64   1    1.3730e-01    3.1162e+05 ;    C29 - O9    
    63     65   1    1.3870e-01    4.0033e+05 ;    C29 - C30   
    64     93   1    1.4390e-01    2.5230e+05 ;     O9 - C44   
    65     66   1    1.0870e-01    2.8811e+05 ;    C30 - H27   
    65     67   1    1.3870e-01    4.0033e+05 ;    C30 - C31   
    67     68   1    1.3730e-01    3.1162e+05 ;    C31 - O10   
    68     69   1    1.4390e-01    2.5230e+05 ;    O10 - C32   
    69     70   1    1.1000e-01    2.7313e+05 ;    C32 - H28   
    69     71   1    1.4390e-01    2.5230e+05 ;    C32 - O11   
    69    179   1    1.5130e-01    2.7070e+05 ;    C32 - C90   
    71     72   1    1.3730e-01    3.1162e+05 ;    O11 - C33   
    72     73   1    1.3870e-01    4.0033e+05 ;    C33 - C34   
    73     74   1    1.0870e-01    2.8811e+05 ;    C34 - H29   
    73     75   1    1.3870e-01    4.0033e+05 ;    C34 - C35   
    75     76   1    1.3730e-01    3.1162e+05 ;    C35 - O12   
    76     77   1    1.4390e-01    2.5230e+05 ;    O12 - C36   
    77     78   1    1.1000e-01    2.7313e+05 ;    C36 - H30   
    77     79   1    1.4390e-01    2.5230e+05 ;    C36 - O13   
    77    153   1    1.5130e-01    2.7070e+05 ;    C36 - C76   
    79     80   1    1.3730e-01    3.1162e+05 ;    O13 - C37   
    80     81   1    1.3870e-01    4.0033e+05 ;    C37 - C38   
    81     82   1    1.0870e-01    2.8811e+05 ;    C38 - H31   
    81     83   1    1.3870e-01    4.0033e+05 ;    C38 - C39   
    83     84   1    1.3730e-01    3.1162e+05 ;    C39 - O14   
    84     85   1    1.4390e-01    2.5230e+05 ;    O14 - C40   
    85     86   1    1.1000e-01    2.7313e+05 ;    C40 - H32   
    85     87   1    1.4390e-01    2.5230e+05 ;    C40 - O15   
    85    127   1    1.5130e-01    2.7070e+05 ;    C40 - C62   
    87     88   1    1.3730e-01    3.1162e+05 ;    O15 - C41   
    88     89   1    1.3870e-01    4.0033e+05 ;    C41 - C42   
    89     90   1    1.0870e-01    2.8811e+05 ;    C42 - H33   
    89     91   1    1.3870e-01    4.0033e+05 ;    C42 - C43   
    91     92   1    1.3730e-01    3.1162e+05 ;    C43 - O16   
    92     93   1    1.4390e-01    2.5230e+05 ;    O16 - C44   
    93     94   1    1.1000e-01    2.7313e+05 ;    C44 - H34   
    93     95   1    1.5130e-01    2.7070e+05 ;    C44 - C45   
    95     96   1    1.3870e-01    4.0033e+05 ;    C45 - C46   
    95     98   1    1.3870e-01    4.0033e+05 ;    C45 - C47   
    96     97   1    1.0870e-01    2.8811e+05 ;    C46 - H35   
    96    104   1    1.3870e-01    4.0033e+05 ;    C46 - C50   
    98     99   1    1.0870e-01    2.8811e+05 ;    C47 - H36   
    98    100   1    1.3870e-01    4.0033e+05 ;    C47 - C48   
   100    101   1    1.3730e-01    3.1162e+05 ;    C48 - O17   
   100    102   1    1.3870e-01    4.0033e+05 ;    C48 - C49   
   101    192   1    1.3730e-01    3.1162e+05 ;    O17 - C97   
   102    103   1    1.0870e-01    2.8811e+05 ;    C49 - H37   
   102    104   1    1.3870e-01    4.0033e+05 ;    C49 - C50   
   104    105   1    1.3730e-01    3.1162e+05 ;    C50 - O18   
   105    106   1    1.3730e-01    3.1162e+05 ;    O18 - C51   
   106    107   1    1.3870e-01    4.0033e+05 ;    C51 - C52   
   106    115   1    1.3870e-01    4.0033e+05 ;    C51 - C56   
   107    108   1    1.3870e-01    4.0033e+05 ;    C52 - C53   
   107    114   1    1.0870e-01    2.8811e+05 ;    C52 - H39   
   108    109   1    1.3870e-01    4.0033e+05 ;    C53 - C54   
   108    111   1    1.4870e-01    2.9263e+05 ;    C53 - C55   
   109    110   1    1.0870e-01    2.8811e+05 ;    C54 - H38   
   109    120   1    1.3870e-01    4.0033e+05 ;    C54 - C58   
   111    112   1    1.2140e-01    5.4225e+05 ;    C55 - O19   
   111    113   1    1.2140e-01    5.4225e+05 ;    C55 - O20   
   115    116   1    1.5130e-01    2.7070e+05 ;    C56 - C57   
   115    120   1    1.3870e-01    4.0033e+05 ;    C56 - C58   
   116    117   1    1.0920e-01    2.8225e+05 ;    C57 - H40   
   116    118   1    1.0920e-01    2.8225e+05 ;    C57 - H41   
   116    119   1    1.0920e-01    2.8225e+05 ;    C57 - H42   
   120    121   1    1.3730e-01    3.1162e+05 ;    C58 - O21   
   121    122   1    1.3730e-01    3.1162e+05 ;    O21 - C59   
   122    123   1    1.3870e-01    4.0033e+05 ;    C59 - C60   
   122    125   1    1.3870e-01    4.0033e+05 ;    C59 - C61   
   123    124   1    1.0870e-01    2.8811e+05 ;    C60 - H43   
   123    130   1    1.3870e-01    4.0033e+05 ;    C60 - C64   
   125    126   1    1.0870e-01    2.8811e+05 ;    C61 - H44   
   125    127   1    1.3870e-01    4.0033e+05 ;    C61 - C62   
   127    128   1    1.3870e-01    4.0033e+05 ;    C62 - C63   
   128    129   1    1.0870e-01    2.8811e+05 ;    C63 - H45   
   128    130   1    1.3870e-01    4.0033e+05 ;    C63 - C64   
   130    131   1    1.3730e-01    3.1162e+05 ;    C64 - O22   
   131    132   1    1.3730e-01    3.1162e+05 ;    O22 - C65   
   132    133   1    1.3870e-01    4.0033e+05 ;    C65 - C66   
   132    141   1    1.3870e-01    4.0033e+05 ;    C65 - C70   
   133    134   1    1.3870e-01    4.0033e+05 ;    C66 - C67   
   133    140   1    1.0870e-01    2.8811e+05 ;    C66 - H47   
   134    135   1    1.3870e-01    4.0033e+05 ;    C67 - C68   
   134    137   1    1.4870e-01    2.9263e+05 ;    C67 - C69   
   135    136   1    1.0870e-01    2.8811e+05 ;    C68 - H46   
   135    146   1    1.3870e-01    4.0033e+05 ;    C68 - C72   
   137    138   1    1.2140e-01    5.4225e+05 ;    C69 - O23   
   137    139   1    1.2140e-01    5.4225e+05 ;    C69 - O24   
   141    142   1    1.5130e-01    2.7070e+05 ;    C70 - C71   
   141    146   1    1.3870e-01    4.0033e+05 ;    C70 - C72   
   142    143   1    1.0920e-01    2.8225e+05 ;    C71 - H48   
   142    144   1    1.0920e-01    2.8225e+05 ;    C71 - H49   
   142    145   1    1.0920e-01    2.8225e+05 ;    C71 - H50   
   146    147   1    1.3730e-01    3.1162e+05 ;    C72 - O25   
   147    148   1    1.3730e-01    3.1162e+05 ;    O25 - C73   
   148    149   1    1.3870e-01    4.0033e+05 ;    C73 - C74   
   148    151   1    1.3870e-01    4.0033e+05 ;    C73 - C75   
   149    150   1    1.0870e-01    2.8811e+05 ;    C74 - H51   
   149    156   1    1.3870e-01    4.0033e+05 ;    C74 - C78   
   151    152   1    1.0870e-01    2.8811e+05 ;    C75 - H52   
   151    153   1    1.3870e-01    4.0033e+05 ;    C75 - C76   
   153    154   1    1.3870e-01    4.0033e+05 ;    C76 - C77   
   154    155   1    1.0870e-01    2.8811e+05 ;    C77 - H53   
   154    156   1    1.3870e-01    4.0033e+05 ;    C77 - C78   
   156    157   1    1.3730e-01    3.1162e+05 ;    C78 - O26   
   157    158   1    1.3730e-01    3.1162e+05 ;    O26 - C79   
   158    159   1    1.3870e-01    4.0033e+05 ;    C79 - C80   
   158    167   1    1.3870e-01    4.0033e+05 ;    C79 - C84   
   159    160   1    1.3870e-01    4.0033e+05 ;    C80 - C81   
   159    166   1    1.0870e-01    2.8811e+05 ;    C80 - H55   
   160    161   1    1.3870e-01    4.0033e+05 ;    C81 - C82   
   160    163   1    1.4870e-01    2.9263e+05 ;    C81 - C83   
   161    162   1    1.0870e-01    2.8811e+05 ;    C82 - H54   
   161    172   1    1.3870e-01    4.0033e+05 ;    C82 - C86   
   163    164   1    1.2140e-01    5.4225e+05 ;    C83 - O27   
   163    165   1    1.2140e-01    5.4225e+05 ;    C83 - O28   
   167    168   1    1.5130e-01    2.7070e+05 ;    C84 - C85   
   167    172   1    1.3870e-01    4.0033e+05 ;    C84 - C86   
   168    169   1    1.0920e-01    2.8225e+05 ;    C85 - H56   
   168    170   1    1.0920e-01    2.8225e+05 ;    C85 - H57   
   168    171   1    1.0920e-01    2.8225e+05 ;    C85 - H58   
   172    173   1    1.3730e-01    3.1162e+05 ;    C86 - O29   
   173    174   1    1.3730e-01    3.1162e+05 ;    O29 - C87   
   174    175   1    1.3870e-01    4.0033e+05 ;    C87 - C88   
   174    177   1    1.3870e-01    4.0033e+05 ;    C87 - C89   
   175    176   1    1.0870e-01    2.8811e+05 ;    C88 - H59   
   175    182   1    1.3870e-01    4.0033e+05 ;    C88 - C92   
   177    178   1    1.0870e-01    2.8811e+05 ;    C89 - H60   
   177    179   1    1.3870e-01    4.0033e+05 ;    C89 - C90   
   179    180   1    1.3870e-01    4.0033e+05 ;    C90 - C91   
   180    181   1    1.0870e-01    2.8811e+05 ;    C91 - H61   
   180    182   1    1.3870e-01    4.0033e+05 ;    C91 - C92   
   182    183   1    1.3730e-01    3.1162e+05 ;    C92 - O30   
   183    184   1    1.3730e-01    3.1162e+05 ;    O30 - C93   
   184    185   1    1.3870e-01    4.0033e+05 ;    C93 - C94   
   184    187   1    1.3870e-01    4.0033e+05 ;    C93 - C95   
   185    186   1    1.0870e-01    2.8811e+05 ;    C94 - H62   
   185    195   1    1.3870e-01    4.0033e+05 ;    C94 - C99   
   187    188   1    1.5130e-01    2.7070e+05 ;    C95 - C96   
   187    192   1    1.3870e-01    4.0033e+05 ;    C95 - C97   
   188    189   1    1.0920e-01    2.8225e+05 ;    C96 - H63   
   188    190   1    1.0920e-01    2.8225e+05 ;    C96 - H64   
   188    191   1    1.0920e-01    2.8225e+05 ;    C96 - H65   
   192    193   1    1.3870e-01    4.0033e+05 ;    C97 - C98   
   193    194   1    1.0870e-01    2.8811e+05 ;    C98 - H66   
   193    195   1    1.3870e-01    4.0033e+05 ;    C98 - C99   
   195    196   1    1.4870e-01    2.9263e+05 ;    C99 - C100  
   196    197   1    1.2140e-01    5.4225e+05 ;   C100 - O31   
   196    198   1    1.2140e-01    5.4225e+05 ;   C100 - O32   

[ pairs ]
;   ai     aj    funct
     1      4      1 ;     O1 - H1    
     1      6      1 ;     O1 - H2    
     1      7      1 ;     O1 - H3    
     1      8      1 ;     O1 - C3    
     2      9      1 ;     C1 - H4    
     2     10      1 ;     C1 - H5    
     2     11      1 ;     C1 - C4    
     3      6      1 ;     O2 - H2    
     3      7      1 ;     O2 - H3    
     3      8      1 ;     O2 - C3    
     4      5      1 ;     H1 - C2    
     5     12      1 ;     C2 - H6    
     5     13      1 ;     C2 - C5    
     5     16      1 ;     C2 - C7    
     6      9      1 ;     H2 - H4    
     6     10      1 ;     H2 - H5    
     6     11      1 ;     H2 - C4    
     7      9      1 ;     H3 - H4    
     7     10      1 ;     H3 - H5    
     7     11      1 ;     H3 - C4    
     8     14      1 ;     C3 - C6    
     8     17      1 ;     C3 - C8    
     8     67      1 ;     C3 - C31   
     8     72      1 ;     C3 - C33   
     9     12      1 ;     H4 - H6    
     9     13      1 ;     H4 - C5    
     9     16      1 ;     H4 - C7    
    10     12      1 ;     H5 - H6    
    10     13      1 ;     H5 - C5    
    10     16      1 ;     H5 - C7    
    11     15      1 ;     C4 - H7    
    11     18      1 ;     C4 - H8    
    11     19      1 ;     C4 - C9    
    11     62      1 ;     C4 - C28   
    11     65      1 ;     C4 - C30   
    11     68      1 ;     C4 - O10   
    11     71      1 ;     C4 - O11   
    11     73      1 ;     C4 - C34   
    12     14      1 ;     H6 - C6    
    12     17      1 ;     H6 - C8    
    12     67      1 ;     H6 - C31   
    12     72      1 ;     H6 - C33   
    13     17      1 ;     C5 - C8    
    13     51      1 ;     C5 - C24   
    13     63      1 ;     C5 - C29   
    13     66      1 ;     C5 - H27   
    13     69      1 ;     C5 - C32   
    13     72      1 ;     C5 - C33   
    14     16      1 ;     C6 - C7    
    14     50      1 ;     C6 - C23   
    14     52      1 ;     C6 - H22   
    14     53      1 ;     C6 - C25   
    14     64      1 ;     C6 - O9    
    14     65      1 ;     C6 - C30   
    14     68      1 ;     C6 - O10   
    15     51      1 ;     H7 - C24   
    15     63      1 ;     H7 - C29   
    15     67      1 ;     H7 - C31   
    16     20      1 ;     C7 - C10   
    16     67      1 ;     C7 - C31   
    16     69      1 ;     C7 - C32   
    16     74      1 ;     C7 - H29   
    16     75      1 ;     C7 - C35   
    17     21      1 ;     C8 - C11   
    17     30      1 ;     C8 - H13   
    17     31      1 ;     C8 - C14   
    17     71      1 ;     C8 - O11   
    17     73      1 ;     C8 - C34   
    17     76      1 ;     C8 - O12   
    18     20      1 ;     H8 - C10   
    18     72      1 ;     H8 - C33   
    18     75      1 ;     H8 - C35   
    19     22      1 ;     C9 - C12   
    19     28      1 ;     C9 - H11   
    19     29      1 ;     C9 - H12   
    19     32      1 ;     C9 - C15   
    19     72      1 ;     C9 - C33   
    19     74      1 ;     C9 - H29   
    19     77      1 ;     C9 - C36   
    19     80      1 ;     C9 - C37   
    20     23      1 ;    C10 - C13   
    20     26      1 ;    C10 - H9    
    20     27      1 ;    C10 - H10   
    20     33      1 ;    C10 - H14   
    20     34      1 ;    C10 - C16   
    20     73      1 ;    C10 - C34   
    20     76      1 ;    C10 - O12   
    20     79      1 ;    C10 - O13   
    20     81      1 ;    C10 - C38   
    21     24      1 ;    C11 - O3    
    21     25      1 ;    C11 - O4    
    21     32      1 ;    C11 - C15   
    21     75      1 ;    C11 - C35   
    21     80      1 ;    C11 - C37   
    22     30      1 ;    C12 - H13   
    22     31      1 ;    C12 - C14   
    23     28      1 ;    C13 - H11   
    23     29      1 ;    C13 - H12   
    24     26      1 ;     O3 - H9    
    24     27      1 ;     O3 - H10   
    25     26      1 ;     O4 - H9    
    25     27      1 ;     O4 - H10   
    26     28      1 ;     H9 - H11   
    26     29      1 ;     H9 - H12   
    27     28      1 ;    H10 - H11   
    27     29      1 ;    H10 - H12   
    28     30      1 ;    H11 - H13   
    28     31      1 ;    H11 - C14   
    29     30      1 ;    H12 - H13   
    29     31      1 ;    H12 - C14   
    30     32      1 ;    H13 - C15   
    30     75      1 ;    H13 - C35   
    30     80      1 ;    H13 - C37   
    31     35      1 ;    C14 - C17   
    31     75      1 ;    C14 - C35   
    31     77      1 ;    C14 - C36   
    31     82      1 ;    C14 - H31   
    31     83      1 ;    C14 - C39   
    32     36      1 ;    C15 - H15   
    32     37      1 ;    C15 - C18   
    32     47      1 ;    C15 - C21   
    32     79      1 ;    C15 - O13   
    32     81      1 ;    C15 - C38   
    32     84      1 ;    C15 - O14   
    33     35      1 ;    H14 - C17   
    33     80      1 ;    H14 - C37   
    33     83      1 ;    H14 - C39   
    34     38      1 ;    C16 - H16   
    34     39      1 ;    C16 - C19   
    34     46      1 ;    C16 - H20   
    34     48      1 ;    C16 - C22   
    34     80      1 ;    C16 - C37   
    34     82      1 ;    C16 - H31   
    34     85      1 ;    C16 - C40   
    34     88      1 ;    C16 - C41   
    35     40      1 ;    C17 - H17   
    35     41      1 ;    C17 - H18   
    35     42      1 ;    C17 - C20   
    35     49      1 ;    C17 - H21   
    35     50      1 ;    C17 - C23   
    35     81      1 ;    C17 - C38   
    35     84      1 ;    C17 - O14   
    35     87      1 ;    C17 - O15   
    35     89      1 ;    C17 - C42   
    36     38      1 ;    H15 - H16   
    36     39      1 ;    H15 - C19   
    36     46      1 ;    H15 - H20   
    36     48      1 ;    H15 - C22   
    36     83      1 ;    H15 - C39   
    36     88      1 ;    H15 - C41   
    37     43      1 ;    C18 - O5    
    37     44      1 ;    C18 - O6    
    37     48      1 ;    C18 - C22   
    37     83      1 ;    C18 - C39   
    37     88      1 ;    C18 - C41   
    38     40      1 ;    H16 - H17   
    38     41      1 ;    H16 - H18   
    38     42      1 ;    H16 - C20   
    38     47      1 ;    H16 - C21   
    39     45      1 ;    C19 - H19   
    39     47      1 ;    C19 - C21   
    40     43      1 ;    H17 - O5    
    40     44      1 ;    H17 - O6    
    40     46      1 ;    H17 - H20   
    41     43      1 ;    H18 - O5    
    41     44      1 ;    H18 - O6    
    41     46      1 ;    H18 - H20   
    42     46      1 ;    C20 - H20   
    43     45      1 ;     O5 - H19   
    46     47      1 ;    H20 - C21   
    47     51      1 ;    C21 - C24   
    47     83      1 ;    C21 - C39   
    47     85      1 ;    C21 - C40   
    47     90      1 ;    C21 - H33   
    47     91      1 ;    C21 - C43   
    48     52      1 ;    C22 - H22   
    48     53      1 ;    C22 - C25   
    48     62      1 ;    C22 - C28   
    48     87      1 ;    C22 - O15   
    48     89      1 ;    C22 - C42   
    48     92      1 ;    C22 - O16   
    49     51      1 ;    H21 - C24   
    49     88      1 ;    H21 - C41   
    49     91      1 ;    H21 - C43   
    50     54      1 ;    C23 - H23   
    50     55      1 ;    C23 - C26   
    50     61      1 ;    C23 - H26   
    50     63      1 ;    C23 - C29   
    50     88      1 ;    C23 - C41   
    50     90      1 ;    C23 - H33   
    50     93      1 ;    C23 - C44   
    51     56      1 ;    C24 - H24   
    51     57      1 ;    C24 - H25   
    51     58      1 ;    C24 - C27   
    51     64      1 ;    C24 - O9    
    51     65      1 ;    C24 - C30   
    51     89      1 ;    C24 - C42   
    51     92      1 ;    C24 - O16   
    52     54      1 ;    H22 - H23   
    52     55      1 ;    H22 - C26   
    52     61      1 ;    H22 - H26   
    52     63      1 ;    H22 - C29   
    52     91      1 ;    H22 - C43   
    53     59      1 ;    C25 - O7    
    53     60      1 ;    C25 - O8    
    53     63      1 ;    C25 - C29   
    53     91      1 ;    C25 - C43   
    54     56      1 ;    H23 - H24   
    54     57      1 ;    H23 - H25   
    54     58      1 ;    H23 - C27   
    54     62      1 ;    H23 - C28   
    55     62      1 ;    C26 - C28   
    56     59      1 ;    H24 - O7    
    56     60      1 ;    H24 - O8    
    56     61      1 ;    H24 - H26   
    57     59      1 ;    H25 - O7    
    57     60      1 ;    H25 - O8    
    57     61      1 ;    H25 - H26   
    58     61      1 ;    C27 - H26   
    61     62      1 ;    H26 - C28   
    62     66      1 ;    C28 - H27   
    62     67      1 ;    C28 - C31   
    62     91      1 ;    C28 - C43   
    62     93      1 ;    C28 - C44   
    63     68      1 ;    C29 - O10   
    63     92      1 ;    C29 - O16   
    63     94      1 ;    C29 - H34   
    63     95      1 ;    C29 - C45   
    64     66      1 ;     O9 - H27   
    64     67      1 ;     O9 - C31   
    64     91      1 ;     O9 - C43   
    64     96      1 ;     O9 - C46   
    64     98      1 ;     O9 - C47   
    65     69      1 ;    C30 - C32   
    65     93      1 ;    C30 - C44   
    66     68      1 ;    H27 - O10   
    67     70      1 ;    C31 - H28   
    67     71      1 ;    C31 - O11   
    67    179      1 ;    C31 - C90   
    68     72      1 ;    O10 - C33   
    68    177      1 ;    O10 - C89   
    68    180      1 ;    O10 - C91   
    69     73      1 ;    C32 - C34   
    69    174      1 ;    C32 - C87   
    69    178      1 ;    C32 - H60   
    69    181      1 ;    C32 - H61   
    69    182      1 ;    C32 - C92   
    70     72      1 ;    H28 - C33   
    70    177      1 ;    H28 - C89   
    70    180      1 ;    H28 - C91   
    71     74      1 ;    O11 - H29   
    71     75      1 ;    O11 - C35   
    71    177      1 ;    O11 - C89   
    71    180      1 ;    O11 - C91   
    72     76      1 ;    C33 - O12   
    72    179      1 ;    C33 - C90   
    73     77      1 ;    C34 - C36   
    74     76      1 ;    H29 - O12   
    75     78      1 ;    C35 - H30   
    75     79      1 ;    C35 - O13   
    75    153      1 ;    C35 - C76   
    76     80      1 ;    O12 - C37   
    76    151      1 ;    O12 - C75   
    76    154      1 ;    O12 - C77   
    77     81      1 ;    C36 - C38   
    77    148      1 ;    C36 - C73   
    77    152      1 ;    C36 - H52   
    77    155      1 ;    C36 - H53   
    77    156      1 ;    C36 - C78   
    78     80      1 ;    H30 - C37   
    78    151      1 ;    H30 - C75   
    78    154      1 ;    H30 - C77   
    79     82      1 ;    O13 - H31   
    79     83      1 ;    O13 - C39   
    79    151      1 ;    O13 - C75   
    79    154      1 ;    O13 - C77   
    80     84      1 ;    C37 - O14   
    80    153      1 ;    C37 - C76   
    81     85      1 ;    C38 - C40   
    82     84      1 ;    H31 - O14   
    83     86      1 ;    C39 - H32   
    83     87      1 ;    C39 - O15   
    83    127      1 ;    C39 - C62   
    84     88      1 ;    O14 - C41   
    84    125      1 ;    O14 - C61   
    84    128      1 ;    O14 - C63   
    85     89      1 ;    C40 - C42   
    85    122      1 ;    C40 - C59   
    85    126      1 ;    C40 - H44   
    85    129      1 ;    C40 - H45   
    85    130      1 ;    C40 - C64   
    86     88      1 ;    H32 - C41   
    86    125      1 ;    H32 - C61   
    86    128      1 ;    H32 - C63   
    87     90      1 ;    O15 - H33   
    87     91      1 ;    O15 - C43   
    87    125      1 ;    O15 - C61   
    87    128      1 ;    O15 - C63   
    88     92      1 ;    C41 - O16   
    88    127      1 ;    C41 - C62   
    89     93      1 ;    C42 - C44   
    90     92      1 ;    H33 - O16   
    91     94      1 ;    C43 - H34   
    91     95      1 ;    C43 - C45   
    92     96      1 ;    O16 - C46   
    92     98      1 ;    O16 - C47   
    93     97      1 ;    C44 - H35   
    93     99      1 ;    C44 - H36   
    93    100      1 ;    C44 - C48   
    93    104      1 ;    C44 - C50   
    94     96      1 ;    H34 - C46   
    94     98      1 ;    H34 - C47   
    95    101      1 ;    C45 - O17   
    95    102      1 ;    C45 - C49   
    95    105      1 ;    C45 - O18   
    96     99      1 ;    C46 - H36   
    96    100      1 ;    C46 - C48   
    96    103      1 ;    C46 - H37   
    96    106      1 ;    C46 - C51   
    97     98      1 ;    H35 - C47   
    97    102      1 ;    H35 - C49   
    97    105      1 ;    H35 - O18   
    98    103      1 ;    C47 - H37   
    98    104      1 ;    C47 - C50   
    98    192      1 ;    C47 - C97   
    99    101      1 ;    H36 - O17   
    99    102      1 ;    H36 - C49   
   100    105      1 ;    C48 - O18   
   100    187      1 ;    C48 - C95   
   100    193      1 ;    C48 - C98   
   101    103      1 ;    O17 - H37   
   101    104      1 ;    O17 - C50   
   101    184      1 ;    O17 - C93   
   101    188      1 ;    O17 - C96   
   101    194      1 ;    O17 - H66   
   101    195      1 ;    O17 - C99   
   102    106      1 ;    C49 - C51   
   102    192      1 ;    C49 - C97   
   103    105      1 ;    H37 - O18   
   104    107      1 ;    C50 - C52   
   104    115      1 ;    C50 - C56   
   105    108      1 ;    O18 - C53   
   105    114      1 ;    O18 - H39   
   105    116      1 ;    O18 - C57   
   105    120      1 ;    O18 - C58   
   106    109      1 ;    C51 - C54   
   106    111      1 ;    C51 - C55   
   106    117      1 ;    C51 - H40   
   106    118      1 ;    C51 - H41   
   106    119      1 ;    C51 - H42   
   106    121      1 ;    C51 - O21   
   107    110      1 ;    C52 - H38   
   107    112      1 ;    C52 - O19   
   107    113      1 ;    C52 - O20   
   107    116      1 ;    C52 - C57   
   107    120      1 ;    C52 - C58   
   108    115      1 ;    C53 - C56   
   108    121      1 ;    C53 - O21   
   109    112      1 ;    C54 - O19   
   109    113      1 ;    C54 - O20   
   109    114      1 ;    C54 - H39   
   109    116      1 ;    C54 - C57   
   109    122      1 ;    C54 - C59   
   110    111      1 ;    H38 - C55   
   110    115      1 ;    H38 - C56   
   110    121      1 ;    H38 - O21   
   111    114      1 ;    C55 - H39   
   111    120      1 ;    C55 - C58   
   114    115      1 ;    H39 - C56   
   115    122      1 ;    C56 - C59   
   116    121      1 ;    C57 - O21   
   117    120      1 ;    H40 - C58   
   118    120      1 ;    H41 - C58   
   119    120      1 ;    H42 - C58   
   120    123      1 ;    C58 - C60   
   120    125      1 ;    C58 - C61   
   121    124      1 ;    O21 - H43   
   121    126      1 ;    O21 - H44   
   121    127      1 ;    O21 - C62   
   121    130      1 ;    O21 - C64   
   122    128      1 ;    C59 - C63   
   122    131      1 ;    C59 - O22   
   123    126      1 ;    C60 - H44   
   123    127      1 ;    C60 - C62   
   123    129      1 ;    C60 - H45   
   123    132      1 ;    C60 - C65   
   124    125      1 ;    H43 - C61   
   124    128      1 ;    H43 - C63   
   124    131      1 ;    H43 - O22   
   125    129      1 ;    C61 - H45   
   125    130      1 ;    C61 - C64   
   126    128      1 ;    H44 - C63   
   127    131      1 ;    C62 - O22   
   128    132      1 ;    C63 - C65   
   129    131      1 ;    H45 - O22   
   130    133      1 ;    C64 - C66   
   130    141      1 ;    C64 - C70   
   131    134      1 ;    O22 - C67   
   131    140      1 ;    O22 - H47   
   131    142      1 ;    O22 - C71   
   131    146      1 ;    O22 - C72   
   132    135      1 ;    C65 - C68   
   132    137      1 ;    C65 - C69   
   132    143      1 ;    C65 - H48   
   132    144      1 ;    C65 - H49   
   132    145      1 ;    C65 - H50   
   132    147      1 ;    C65 - O25   
   133    136      1 ;    C66 - H46   
   133    138      1 ;    C66 - O23   
   133    139      1 ;    C66 - O24   
   133    142      1 ;    C66 - C71   
   133    146      1 ;    C66 - C72   
   134    141      1 ;    C67 - C70   
   134    147      1 ;    C67 - O25   
   135    138      1 ;    C68 - O23   
   135    139      1 ;    C68 - O24   
   135    140      1 ;    C68 - H47   
   135    142      1 ;    C68 - C71   
   135    148      1 ;    C68 - C73   
   136    137      1 ;    H46 - C69   
   136    141      1 ;    H46 - C70   
   136    147      1 ;    H46 - O25   
   137    140      1 ;    C69 - H47   
   137    146      1 ;    C69 - C72   
   140    141      1 ;    H47 - C70   
   141    148      1 ;    C70 - C73   
   142    147      1 ;    C71 - O25   
   143    146      1 ;    H48 - C72   
   144    146      1 ;    H49 - C72   
   145    146      1 ;    H50 - C72   
   146    149      1 ;    C72 - C74   
   146    151      1 ;    C72 - C75   
   147    150      1 ;    O25 - H51   
   147    152      1 ;    O25 - H52   
   147    153      1 ;    O25 - C76   
   147    156      1 ;    O25 - C78   
   148    154      1 ;    C73 - C77   
   148    157      1 ;    C73 - O26   
   149    152      1 ;    C74 - H52   
   149    153      1 ;    C74 - C76   
   149    155      1 ;    C74 - H53   
   149    158      1 ;    C74 - C79   
   150    151      1 ;    H51 - C75   
   150    154      1 ;    H51 - C77   
   150    157      1 ;    H51 - O26   
   151    155      1 ;    C75 - H53   
   151    156      1 ;    C75 - C78   
   152    154      1 ;    H52 - C77   
   153    157      1 ;    C76 - O26   
   154    158      1 ;    C77 - C79   
   155    157      1 ;    H53 - O26   
   156    159      1 ;    C78 - C80   
   156    167      1 ;    C78 - C84   
   157    160      1 ;    O26 - C81   
   157    166      1 ;    O26 - H55   
   157    168      1 ;    O26 - C85   
   157    172      1 ;    O26 - C86   
   158    161      1 ;    C79 - C82   
   158    163      1 ;    C79 - C83   
   158    169      1 ;    C79 - H56   
   158    170      1 ;    C79 - H57   
   158    171      1 ;    C79 - H58   
   158    173      1 ;    C79 - O29   
   159    162      1 ;    C80 - H54   
   159    164      1 ;    C80 - O27   
   159    165      1 ;    C80 - O28   
   159    168      1 ;    C80 - C85   
   159    172      1 ;    C80 - C86   
   160    167      1 ;    C81 - C84   
   160    173      1 ;    C81 - O29   
   161    164      1 ;    C82 - O27   
   161    165      1 ;    C82 - O28   
   161    166      1 ;    C82 - H55   
   161    168      1 ;    C82 - C85   
   161    174      1 ;    C82 - C87   
   162    163      1 ;    H54 - C83   
   162    167      1 ;    H54 - C84   
   162    173      1 ;    H54 - O29   
   163    166      1 ;    C83 - H55   
   163    172      1 ;    C83 - C86   
   166    167      1 ;    H55 - C84   
   167    174      1 ;    C84 - C87   
   168    173      1 ;    C85 - O29   
   169    172      1 ;    H56 - C86   
   170    172      1 ;    H57 - C86   
   171    172      1 ;    H58 - C86   
   172    175      1 ;    C86 - C88   
   172    177      1 ;    C86 - C89   
   173    176      1 ;    O29 - H59   
   173    178      1 ;    O29 - H60   
   173    179      1 ;    O29 - C90   
   173    182      1 ;    O29 - C92   
   174    180      1 ;    C87 - C91   
   174    183      1 ;    C87 - O30   
   175    178      1 ;    C88 - H60   
   175    179      1 ;    C88 - C90   
   175    181      1 ;    C88 - H61   
   175    184      1 ;    C88 - C93   
   176    177      1 ;    H59 - C89   
   176    180      1 ;    H59 - C91   
   176    183      1 ;    H59 - O30   
   177    181      1 ;    C89 - H61   
   177    182      1 ;    C89 - C92   
   178    180      1 ;    H60 - C91   
   179    183      1 ;    C90 - O30   
   180    184      1 ;    C91 - C93   
   181    183      1 ;    H61 - O30   
   182    185      1 ;    C92 - C94   
   182    187      1 ;    C92 - C95   
   183    186      1 ;    O30 - H62   
   183    188      1 ;    O30 - C96   
   183    192      1 ;    O30 - C97   
   183    195      1 ;    O30 - C99   
   184    189      1 ;    C93 - H63   
   184    190      1 ;    C93 - H64   
   184    191      1 ;    C93 - H65   
   184    193      1 ;    C93 - C98   
   184    196      1 ;    C93 - C100  
   185    188      1 ;    C94 - C96   
   185    192      1 ;    C94 - C97   
   185    194      1 ;    C94 - H66   
   185    197      1 ;    C94 - O31   
   185    198      1 ;    C94 - O32   
   186    187      1 ;    H62 - C95   
   186    193      1 ;    H62 - C98   
   186    196      1 ;    H62 - C100  
   187    194      1 ;    C95 - H66   
   187    195      1 ;    C95 - C99   
   188    193      1 ;    C96 - C98   
   189    192      1 ;    H63 - C97   
   190    192      1 ;    H64 - C97   
   191    192      1 ;    H65 - C97   
   192    196      1 ;    C97 - C100  
   193    197      1 ;    C98 - O31   
   193    198      1 ;    C98 - O32   
   194    196      1 ;    H66 - C100  

[ angles ]
;   ai     aj     ak    funct   theta         cth
     1      2      3      1    1.2288e+02    6.4752e+02 ;     O1 - C1     - O2    
     1      2      5      1    1.2311e+02    5.6928e+02 ;     O1 - C1     - C2    
     2      3      4      1    1.0737e+02    4.2836e+02 ;     C1 - O2     - H1    
     2      5      6      1    1.0968e+02    3.9497e+02 ;     C1 - C2     - H2    
     2      5      7      1    1.0968e+02    3.9497e+02 ;     C1 - C2     - H3    
     2      5      8      1    1.1053e+02    5.3379e+02 ;     C1 - C2     - C3    
     3      2      5      1    1.1220e+02    5.8442e+02 ;     O2 - C1     - C2    
     5      8      9      1    1.1005e+02    3.8802e+02 ;     C2 - C3     - H4    
     5      8     10      1    1.1005e+02    3.8802e+02 ;     C2 - C3     - H5    
     5      8     11      1    1.1063e+02    5.2894e+02 ;     C2 - C3     - C4    
     6      5      7      1    1.0835e+02    3.2995e+02 ;     H2 - C2     - H3    
     6      5      8      1    1.1005e+02    3.8802e+02 ;     H2 - C2     - C3    
     7      5      8      1    1.1005e+02    3.8802e+02 ;     H3 - C2     - C3    
     8     11     12      1    1.1005e+02    3.8802e+02 ;     C3 - C4     - H6    
     8     11     13      1    1.1209e+02    5.2928e+02 ;     C3 - C4     - C5    
     8     11     16      1    1.1209e+02    5.2928e+02 ;     C3 - C4     - C7    
     9      8     10      1    1.0835e+02    3.2995e+02 ;     H4 - C3     - H5    
     9      8     11      1    1.1005e+02    3.8802e+02 ;     H4 - C3     - C4    
    10      8     11      1    1.1005e+02    3.8802e+02 ;     H5 - C3     - C4    
    11     13     14      1    1.2063e+02    5.3421e+02 ;     C4 - C5     - C6    
    11     13     67      1    1.2063e+02    5.3421e+02 ;     C4 - C5     - C31   
    11     16     17      1    1.2063e+02    5.3421e+02 ;     C4 - C7     - C8    
    11     16     72      1    1.2063e+02    5.3421e+02 ;     C4 - C7     - C33   
    12     11     13      1    1.1015e+02    3.9296e+02 ;     H6 - C4     - C5    
    12     11     16      1    1.1015e+02    3.9296e+02 ;     H6 - C4     - C7    
    13     11     16      1    1.1226e+02    5.3271e+02 ;     C5 - C4     - C7    
    13     14     15      1    1.2001e+02    4.0551e+02 ;     C5 - C6     - H7    
    13     14     62      1    1.1997e+02    5.6216e+02 ;     C5 - C6     - C28   
    13     67     65      1    1.1997e+02    5.6216e+02 ;     C5 - C31    - C30   
    13     67     68      1    1.1920e+02    5.8400e+02 ;     C5 - C31    - O10   
    14     13     67      1    1.1997e+02    5.6216e+02 ;     C6 - C5     - C31   
    14     62     51      1    1.2063e+02    5.3421e+02 ;     C6 - C28    - C24   
    14     62     63      1    1.1997e+02    5.6216e+02 ;     C6 - C28    - C29   
    15     14     62      1    1.2001e+02    4.0551e+02 ;     H7 - C6     - C28   
    16     17     18      1    1.2001e+02    4.0551e+02 ;     C7 - C8     - H8    
    16     17     19      1    1.1997e+02    5.6216e+02 ;     C7 - C8     - C9    
    16     72     71      1    1.1920e+02    5.8400e+02 ;     C7 - C33    - O11   
    16     72     73      1    1.1997e+02    5.6216e+02 ;     C7 - C33    - C34   
    17     16     72      1    1.1997e+02    5.6216e+02 ;     C8 - C7     - C33   
    17     19     20      1    1.2063e+02    5.3421e+02 ;     C8 - C9     - C10   
    17     19     75      1    1.1997e+02    5.6216e+02 ;     C8 - C9     - C35   
    18     17     19      1    1.2001e+02    4.0551e+02 ;     H8 - C8     - C9    
    19     20     21      1    1.1209e+02    5.2928e+02 ;     C9 - C10    - C11   
    19     20     30      1    1.1015e+02    3.9296e+02 ;     C9 - C10    - H13   
    19     20     31      1    1.1226e+02    5.3271e+02 ;     C9 - C10    - C14   
    19     75     73      1    1.1997e+02    5.6216e+02 ;     C9 - C35    - C34   
    19     75     76      1    1.1920e+02    5.8400e+02 ;     C9 - C35    - O12   
    20     19     75      1    1.2063e+02    5.3421e+02 ;    C10 - C9     - C35   
    20     21     22      1    1.1063e+02    5.2894e+02 ;    C10 - C11    - C12   
    20     21     28      1    1.1005e+02    3.8802e+02 ;    C10 - C11    - H11   
    20     21     29      1    1.1005e+02    3.8802e+02 ;    C10 - C11    - H12   
    20     31     32      1    1.2063e+02    5.3421e+02 ;    C10 - C14    - C15   
    20     31     80      1    1.2063e+02    5.3421e+02 ;    C10 - C14    - C37   
    21     20     30      1    1.1005e+02    3.8802e+02 ;    C11 - C10    - H13   
    21     20     31      1    1.1209e+02    5.2928e+02 ;    C11 - C10    - C14   
    21     22     23      1    1.1053e+02    5.3379e+02 ;    C11 - C12    - C13   
    21     22     26      1    1.1005e+02    3.8802e+02 ;    C11 - C12    - H9    
    21     22     27      1    1.1005e+02    3.8802e+02 ;    C11 - C12    - H10   
    22     21     28      1    1.1005e+02    3.8802e+02 ;    C12 - C11    - H11   
    22     21     29      1    1.1005e+02    3.8802e+02 ;    C12 - C11    - H12   
    22     23     24      1    1.2311e+02    5.6928e+02 ;    C12 - C13    - O3    
    22     23     25      1    1.2311e+02    5.6928e+02 ;    C12 - C13    - O4    
    23     22     26      1    1.0968e+02    3.9497e+02 ;    C13 - C12    - H9    
    23     22     27      1    1.0968e+02    3.9497e+02 ;    C13 - C12    - H10   
    24     23     25      1    1.3038e+02    6.5413e+02 ;     O3 - C13    - O4    
    26     22     27      1    1.0835e+02    3.2995e+02 ;     H9 - C12    - H10   
    28     21     29      1    1.0835e+02    3.2995e+02 ;    H11 - C11    - H12   
    30     20     31      1    1.1015e+02    3.9296e+02 ;    H13 - C10    - C14   
    31     32     33      1    1.2001e+02    4.0551e+02 ;    C14 - C15    - H14   
    31     32     34      1    1.1997e+02    5.6216e+02 ;    C14 - C15    - C16   
    31     80     79      1    1.1920e+02    5.8400e+02 ;    C14 - C37    - O13   
    31     80     81      1    1.1997e+02    5.6216e+02 ;    C14 - C37    - C38   
    32     31     80      1    1.1997e+02    5.6216e+02 ;    C15 - C14    - C37   
    32     34     35      1    1.2063e+02    5.3421e+02 ;    C15 - C16    - C17   
    32     34     83      1    1.1997e+02    5.6216e+02 ;    C15 - C16    - C39   
    33     32     34      1    1.2001e+02    4.0551e+02 ;    H14 - C15    - C16   
    34     35     36      1    1.1015e+02    3.9296e+02 ;    C16 - C17    - H15   
    34     35     37      1    1.1209e+02    5.2928e+02 ;    C16 - C17    - C18   
    34     35     47      1    1.1226e+02    5.3271e+02 ;    C16 - C17    - C21   
    34     83     81      1    1.1997e+02    5.6216e+02 ;    C16 - C39    - C38   
    34     83     84      1    1.1920e+02    5.8400e+02 ;    C16 - C39    - O14   
    35     34     83      1    1.2063e+02    5.3421e+02 ;    C17 - C16    - C39   
    35     37     38      1    1.1005e+02    3.8802e+02 ;    C17 - C18    - H16   
    35     37     39      1    1.1063e+02    5.2894e+02 ;    C17 - C18    - C19   
    35     37     46      1    1.1005e+02    3.8802e+02 ;    C17 - C18    - H20   
    35     47     48      1    1.2063e+02    5.3421e+02 ;    C17 - C21    - C22   
    35     47     88      1    1.2063e+02    5.3421e+02 ;    C17 - C21    - C41   
    36     35     37      1    1.1005e+02    3.8802e+02 ;    H15 - C17    - C18   
    36     35     47      1    1.1015e+02    3.9296e+02 ;    H15 - C17    - C21   
    37     35     47      1    1.1209e+02    5.2928e+02 ;    C18 - C17    - C21   
    37     39     40      1    1.1005e+02    3.8802e+02 ;    C18 - C19    - H17   
    37     39     41      1    1.1005e+02    3.8802e+02 ;    C18 - C19    - H18   
    37     39     42      1    1.1053e+02    5.3379e+02 ;    C18 - C19    - C20   
    38     37     39      1    1.1005e+02    3.8802e+02 ;    H16 - C18    - C19   
    38     37     46      1    1.0835e+02    3.2995e+02 ;    H16 - C18    - H20   
    39     37     46      1    1.1005e+02    3.8802e+02 ;    C19 - C18    - H20   
    39     42     43      1    1.2311e+02    5.6928e+02 ;    C19 - C20    - O5    
    39     42     44      1    1.1220e+02    5.8442e+02 ;    C19 - C20    - O6    
    40     39     41      1    1.0835e+02    3.2995e+02 ;    H17 - C19    - H18   
    40     39     42      1    1.0968e+02    3.9497e+02 ;    H17 - C19    - C20   
    41     39     42      1    1.0968e+02    3.9497e+02 ;    H18 - C19    - C20   
    42     44     45      1    1.0737e+02    4.2836e+02 ;    C20 - O6     - H19   
    43     42     44      1    1.2288e+02    6.4752e+02 ;     O5 - C20    - O6    
    47     48     49      1    1.2001e+02    4.0551e+02 ;    C21 - C22    - H21   
    47     48     50      1    1.1997e+02    5.6216e+02 ;    C21 - C22    - C23   
    47     88     87      1    1.1920e+02    5.8400e+02 ;    C21 - C41    - O15   
    47     88     89      1    1.1997e+02    5.6216e+02 ;    C21 - C41    - C42   
    48     47     88      1    1.1997e+02    5.6216e+02 ;    C22 - C21    - C41   
    48     50     51      1    1.2063e+02    5.3421e+02 ;    C22 - C23    - C24   
    48     50     91      1    1.1997e+02    5.6216e+02 ;    C22 - C23    - C43   
    49     48     50      1    1.2001e+02    4.0551e+02 ;    H21 - C22    - C23   
    50     51     52      1    1.1015e+02    3.9296e+02 ;    C23 - C24    - H22   
    50     51     53      1    1.1209e+02    5.2928e+02 ;    C23 - C24    - C25   
    50     51     62      1    1.1226e+02    5.3271e+02 ;    C23 - C24    - C28   
    50     91     89      1    1.1997e+02    5.6216e+02 ;    C23 - C43    - C42   
    50     91     92      1    1.1920e+02    5.8400e+02 ;    C23 - C43    - O16   
    51     50     91      1    1.2063e+02    5.3421e+02 ;    C24 - C23    - C43   
    51     53     54      1    1.1005e+02    3.8802e+02 ;    C24 - C25    - H23   
    51     53     55      1    1.1063e+02    5.2894e+02 ;    C24 - C25    - C26   
    51     53     61      1    1.1005e+02    3.8802e+02 ;    C24 - C25    - H26   
    51     62     63      1    1.2063e+02    5.3421e+02 ;    C24 - C28    - C29   
    52     51     53      1    1.1005e+02    3.8802e+02 ;    H22 - C24    - C25   
    52     51     62      1    1.1015e+02    3.9296e+02 ;    H22 - C24    - C28   
    53     51     62      1    1.1209e+02    5.2928e+02 ;    C25 - C24    - C28   
    53     55     56      1    1.1005e+02    3.8802e+02 ;    C25 - C26    - H24   
    53     55     57      1    1.1005e+02    3.8802e+02 ;    C25 - C26    - H25   
    53     55     58      1    1.1053e+02    5.3379e+02 ;    C25 - C26    - C27   
    54     53     55      1    1.1005e+02    3.8802e+02 ;    H23 - C25    - C26   
    54     53     61      1    1.0835e+02    3.2995e+02 ;    H23 - C25    - H26   
    55     53     61      1    1.1005e+02    3.8802e+02 ;    C26 - C25    - H26   
    55     58     59      1    1.2311e+02    5.6928e+02 ;    C26 - C27    - O7    
    55     58     60      1    1.2311e+02    5.6928e+02 ;    C26 - C27    - O8    
    56     55     57      1    1.0835e+02    3.2995e+02 ;    H24 - C26    - H25   
    56     55     58      1    1.0968e+02    3.9497e+02 ;    H24 - C26    - C27   
    57     55     58      1    1.0968e+02    3.9497e+02 ;    H25 - C26    - C27   
    59     58     60      1    1.3038e+02    6.5413e+02 ;     O7 - C27    - O8    
    62     63     64      1    1.1920e+02    5.8400e+02 ;    C28 - C29    - O9    
    62     63     65      1    1.1997e+02    5.6216e+02 ;    C28 - C29    - C30   
    63     64     93      1    1.1797e+02    5.2108e+02 ;    C29 - O9     - C44   
    63     65     66      1    1.2001e+02    4.0551e+02 ;    C29 - C30    - H27   
    63     65     67      1    1.1997e+02    5.6216e+02 ;    C29 - C30    - C31   
    64     63     65      1    1.1920e+02    5.8400e+02 ;     O9 - C29    - C30   
    64     93     92      1    1.1024e+02    6.0015e+02 ;     O9 - C44    - O16   
    64     93     94      1    1.0858e+02    4.2543e+02 ;     O9 - C44    - H34   
    64     93     95      1    1.0889e+02    5.7061e+02 ;     O9 - C44    - C45   
    65     67     68      1    1.1920e+02    5.8400e+02 ;    C30 - C31    - O10   
    66     65     67      1    1.2001e+02    4.0551e+02 ;    H27 - C30    - C31   
    67     68     69      1    1.1797e+02    5.2108e+02 ;    C31 - O10    - C32   
    68     69     70      1    1.0858e+02    4.2543e+02 ;    O10 - C32    - H28   
    68     69     71      1    1.1024e+02    6.0015e+02 ;    O10 - C32    - O11   
    68     69    179      1    1.0889e+02    5.7061e+02 ;    O10 - C32    - C90   
    69     71     72      1    1.1797e+02    5.2108e+02 ;    C32 - O11    - C33   
    69    179    177      1    1.2063e+02    5.3421e+02 ;    C32 - C90    - C89   
    69    179    180      1    1.2063e+02    5.3421e+02 ;    C32 - C90    - C91   
    70     69     71      1    1.0858e+02    4.2543e+02 ;    H28 - C32    - O11   
    70     69    179      1    1.0966e+02    3.9355e+02 ;    H28 - C32    - C90   
    71     69    179      1    1.0889e+02    5.7061e+02 ;    O11 - C32    - C90   
    71     72     73      1    1.1920e+02    5.8400e+02 ;    O11 - C33    - C34   
    72     73     74      1    1.2001e+02    4.0551e+02 ;    C33 - C34    - H29   
    72     73     75      1    1.1997e+02    5.6216e+02 ;    C33 - C34    - C35   
    73     75     76      1    1.1920e+02    5.8400e+02 ;    C34 - C35    - O12   
    74     73     75      1    1.2001e+02    4.0551e+02 ;    H29 - C34    - C35   
    75     76     77      1    1.1797e+02    5.2108e+02 ;    C35 - O12    - C36   
    76     77     78      1    1.0858e+02    4.2543e+02 ;    O12 - C36    - H30   
    76     77     79      1    1.1024e+02    6.0015e+02 ;    O12 - C36    - O13   
    76     77    153      1    1.0889e+02    5.7061e+02 ;    O12 - C36    - C76   
    77     79     80      1    1.1797e+02    5.2108e+02 ;    C36 - O13    - C37   
    77    153    151      1    1.2063e+02    5.3421e+02 ;    C36 - C76    - C75   
    77    153    154      1    1.2063e+02    5.3421e+02 ;    C36 - C76    - C77   
    78     77     79      1    1.0858e+02    4.2543e+02 ;    H30 - C36    - O13   
    78     77    153      1    1.0966e+02    3.9355e+02 ;    H30 - C36    - C76   
    79     77    153      1    1.0889e+02    5.7061e+02 ;    O13 - C36    - C76   
    79     80     81      1    1.1920e+02    5.8400e+02 ;    O13 - C37    - C38   
    80     81     82      1    1.2001e+02    4.0551e+02 ;    C37 - C38    - H31   
    80     81     83      1    1.1997e+02    5.6216e+02 ;    C37 - C38    - C39   
    81     83     84      1    1.1920e+02    5.8400e+02 ;    C38 - C39    - O14   
    82     81     83      1    1.2001e+02    4.0551e+02 ;    H31 - C38    - C39   
    83     84     85      1    1.1797e+02    5.2108e+02 ;    C39 - O14    - C40   
    84     85     86      1    1.0858e+02    4.2543e+02 ;    O14 - C40    - H32   
    84     85     87      1    1.1024e+02    6.0015e+02 ;    O14 - C40    - O15   
    84     85    127      1    1.0889e+02    5.7061e+02 ;    O14 - C40    - C62   
    85     87     88      1    1.1797e+02    5.2108e+02 ;    C40 - O15    - C41   
    85    127    125      1    1.2063e+02    5.3421e+02 ;    C40 - C62    - C61   
    85    127    128      1    1.2063e+02    5.3421e+02 ;    C40 - C62    - C63   
    86     85     87      1    1.0858e+02    4.2543e+02 ;    H32 - C40    - O15   
    86     85    127      1    1.0966e+02    3.9355e+02 ;    H32 - C40    - C62   
    87     85    127      1    1.0889e+02    5.7061e+02 ;    O15 - C40    - C62   
    87     88     89      1    1.1920e+02    5.8400e+02 ;    O15 - C41    - C42   
    88     89     90      1    1.2001e+02    4.0551e+02 ;    C41 - C42    - H33   
    88     89     91      1    1.1997e+02    5.6216e+02 ;    C41 - C42    - C43   
    89     91     92      1    1.1920e+02    5.8400e+02 ;    C42 - C43    - O16   
    90     89     91      1    1.2001e+02    4.0551e+02 ;    H33 - C42    - C43   
    91     92     93      1    1.1797e+02    5.2108e+02 ;    C43 - O16    - C44   
    92     93     94      1    1.0858e+02    4.2543e+02 ;    O16 - C44    - H34   
    92     93     95      1    1.0889e+02    5.7061e+02 ;    O16 - C44    - C45   
    93     95     96      1    1.2063e+02    5.3421e+02 ;    C44 - C45    - C46   
    93     95     98      1    1.2063e+02    5.3421e+02 ;    C44 - C45    - C47   
    94     93     95      1    1.0966e+02    3.9355e+02 ;    H34 - C44    - C45   
    95     96     97      1    1.2001e+02    4.0551e+02 ;    C45 - C46    - H35   
    95     96    104      1    1.1997e+02    5.6216e+02 ;    C45 - C46    - C50   
    95     98     99      1    1.2001e+02    4.0551e+02 ;    C45 - C47    - H36   
    95     98    100      1    1.1997e+02    5.6216e+02 ;    C45 - C47    - C48   
    96     95     98      1    1.1997e+02    5.6216e+02 ;    C46 - C45    - C47   
    96    104    102      1    1.1997e+02    5.6216e+02 ;    C46 - C50    - C49   
    96    104    105      1    1.1920e+02    5.8400e+02 ;    C46 - C50    - O18   
    97     96    104      1    1.2001e+02    4.0551e+02 ;    H35 - C46    - C50   
    98    100    101      1    1.1920e+02    5.8400e+02 ;    C47 - C48    - O17   
    98    100    102      1    1.1997e+02    5.6216e+02 ;    C47 - C48    - C49   
    99     98    100      1    1.2001e+02    4.0551e+02 ;    H36 - C47    - C48   
   100    101    192      1    1.1995e+02    5.2978e+02 ;    C48 - O17    - C97   
   100    102    103      1    1.2001e+02    4.0551e+02 ;    C48 - C49    - H37   
   100    102    104      1    1.1997e+02    5.6216e+02 ;    C48 - C49    - C50   
   101    100    102      1    1.1920e+02    5.8400e+02 ;    O17 - C48    - C49   
   101    192    187      1    1.1920e+02    5.8400e+02 ;    O17 - C97    - C95   
   101    192    193      1    1.1920e+02    5.8400e+02 ;    O17 - C97    - C98   
   102    104    105      1    1.1920e+02    5.8400e+02 ;    C49 - C50    - O18   
   103    102    104      1    1.2001e+02    4.0551e+02 ;    H37 - C49    - C50   
   104    105    106      1    1.1995e+02    5.2978e+02 ;    C50 - O18    - C51   
   105    106    107      1    1.1920e+02    5.8400e+02 ;    O18 - C51    - C52   
   105    106    115      1    1.1920e+02    5.8400e+02 ;    O18 - C51    - C56   
   106    107    108      1    1.1997e+02    5.6216e+02 ;    C51 - C52    - C53   
   106    107    114      1    1.2001e+02    4.0551e+02 ;    C51 - C52    - H39   
   106    115    116      1    1.2063e+02    5.3421e+02 ;    C51 - C56    - C57   
   106    115    120      1    1.1997e+02    5.6216e+02 ;    C51 - C56    - C58   
   107    106    115      1    1.1997e+02    5.6216e+02 ;    C52 - C51    - C56   
   107    108    109      1    1.1997e+02    5.6216e+02 ;    C52 - C53    - C54   
   107    108    111      1    1.2014e+02    5.4091e+02 ;    C52 - C53    - C55   
   108    107    114      1    1.2001e+02    4.0551e+02 ;    C53 - C52    - H39   
   108    109    110      1    1.2001e+02    4.0551e+02 ;    C53 - C54    - H38   
   108    109    120      1    1.1997e+02    5.6216e+02 ;    C53 - C54    - C58   
   108    111    112      1    1.2344e+02    5.7463e+02 ;    C53 - C55    - O19   
   108    111    113      1    1.2344e+02    5.7463e+02 ;    C53 - C55    - O20   
   109    108    111      1    1.2014e+02    5.4091e+02 ;    C54 - C53    - C55   
   109    120    115      1    1.1997e+02    5.6216e+02 ;    C54 - C58    - C56   
   109    120    121      1    1.1920e+02    5.8400e+02 ;    C54 - C58    - O21   
   110    109    120      1    1.2001e+02    4.0551e+02 ;    H38 - C54    - C58   
   112    111    113      1    1.3038e+02    6.5413e+02 ;    O19 - C55    - O20   
   115    116    117      1    1.1015e+02    3.9296e+02 ;    C56 - C57    - H40   
   115    116    118      1    1.1015e+02    3.9296e+02 ;    C56 - C57    - H41   
   115    116    119      1    1.1015e+02    3.9296e+02 ;    C56 - C57    - H42   
   115    120    121      1    1.1920e+02    5.8400e+02 ;    C56 - C58    - O21   
   116    115    120      1    1.2063e+02    5.3421e+02 ;    C57 - C56    - C58   
   117    116    118      1    1.0835e+02    3.2995e+02 ;    H40 - C57    - H41   
   117    116    119      1    1.0835e+02    3.2995e+02 ;    H40 - C57    - H42   
   118    116    119      1    1.0835e+02    3.2995e+02 ;    H41 - C57    - H42   
   120    121    122      1    1.1995e+02    5.2978e+02 ;    C58 - O21    - C59   
   121    122    123      1    1.1920e+02    5.8400e+02 ;    O21 - C59    - C60   
   121    122    125      1    1.1920e+02    5.8400e+02 ;    O21 - C59    - C61   
   122    123    124      1    1.2001e+02    4.0551e+02 ;    C59 - C60    - H43   
   122    123    130      1    1.1997e+02    5.6216e+02 ;    C59 - C60    - C64   
   122    125    126      1    1.2001e+02    4.0551e+02 ;    C59 - C61    - H44   
   122    125    127      1    1.1997e+02    5.6216e+02 ;    C59 - C61    - C62   
   123    122    125      1    1.1997e+02    5.6216e+02 ;    C60 - C59    - C61   
   123    130    128      1    1.1997e+02    5.6216e+02 ;    C60 - C64    - C63   
   123    130    131      1    1.1920e+02    5.8400e+02 ;    C60 - C64    - O22   
   124    123    130      1    1.2001e+02    4.0551e+02 ;    H43 - C60    - C64   
   125    127    128      1    1.1997e+02    5.6216e+02 ;    C61 - C62    - C63   
   126    125    127      1    1.2001e+02    4.0551e+02 ;    H44 - C61    - C62   
   127    128    129      1    1.2001e+02    4.0551e+02 ;    C62 - C63    - H45   
   127    128    130      1    1.1997e+02    5.6216e+02 ;    C62 - C63    - C64   
   128    130    131      1    1.1920e+02    5.8400e+02 ;    C63 - C64    - O22   
   129    128    130      1    1.2001e+02    4.0551e+02 ;    H45 - C63    - C64   
   130    131    132      1    1.1995e+02    5.2978e+02 ;    C64 - O22    - C65   
   131    132    133      1    1.1920e+02    5.8400e+02 ;    O22 - C65    - C66   
   131    132    141      1    1.1920e+02    5.8400e+02 ;    O22 - C65    - C70   
   132    133    134      1    1.1997e+02    5.6216e+02 ;    C65 - C66    - C67   
   132    133    140      1    1.2001e+02    4.0551e+02 ;    C65 - C66    - H47   
   132    141    142      1    1.2063e+02    5.3421e+02 ;    C65 - C70    - C71   
   132    141    146      1    1.1997e+02    5.6216e+02 ;    C65 - C70    - C72   
   133    132    141      1    1.1997e+02    5.6216e+02 ;    C66 - C65    - C70   
   133    134    135      1    1.1997e+02    5.6216e+02 ;    C66 - C67    - C68   
   133    134    137      1    1.2014e+02    5.4091e+02 ;    C66 - C67    - C69   
   134    133    140      1    1.2001e+02    4.0551e+02 ;    C67 - C66    - H47   
   134    135    136      1    1.2001e+02    4.0551e+02 ;    C67 - C68    - H46   
   134    135    146      1    1.1997e+02    5.6216e+02 ;    C67 - C68    - C72   
   134    137    138      1    1.2344e+02    5.7463e+02 ;    C67 - C69    - O23   
   134    137    139      1    1.2344e+02    5.7463e+02 ;    C67 - C69    - O24   
   135    134    137      1    1.2014e+02    5.4091e+02 ;    C68 - C67    - C69   
   135    146    141      1    1.1997e+02    5.6216e+02 ;    C68 - C72    - C70   
   135    146    147      1    1.1920e+02    5.8400e+02 ;    C68 - C72    - O25   
   136    135    146      1    1.2001e+02    4.0551e+02 ;    H46 - C68    - C72   
   138    137    139      1    1.3038e+02    6.5413e+02 ;    O23 - C69    - O24   
   141    142    143      1    1.1015e+02    3.9296e+02 ;    C70 - C71    - H48   
   141    142    144      1    1.1015e+02    3.9296e+02 ;    C70 - C71    - H49   
   141    142    145      1    1.1015e+02    3.9296e+02 ;    C70 - C71    - H50   
   141    146    147      1    1.1920e+02    5.8400e+02 ;    C70 - C72    - O25   
   142    141    146      1    1.2063e+02    5.3421e+02 ;    C71 - C70    - C72   
   143    142    144      1    1.0835e+02    3.2995e+02 ;    H48 - C71    - H49   
   143    142    145      1    1.0835e+02    3.2995e+02 ;    H48 - C71    - H50   
   144    142    145      1    1.0835e+02    3.2995e+02 ;    H49 - C71    - H50   
   146    147    148      1    1.1995e+02    5.2978e+02 ;    C72 - O25    - C73   
   147    148    149      1    1.1920e+02    5.8400e+02 ;    O25 - C73    - C74   
   147    148    151      1    1.1920e+02    5.8400e+02 ;    O25 - C73    - C75   
   148    149    150      1    1.2001e+02    4.0551e+02 ;    C73 - C74    - H51   
   148    149    156      1    1.1997e+02    5.6216e+02 ;    C73 - C74    - C78   
   148    151    152      1    1.2001e+02    4.0551e+02 ;    C73 - C75    - H52   
   148    151    153      1    1.1997e+02    5.6216e+02 ;    C73 - C75    - C76   
   149    148    151      1    1.1997e+02    5.6216e+02 ;    C74 - C73    - C75   
   149    156    154      1    1.1997e+02    5.6216e+02 ;    C74 - C78    - C77   
   149    156    157      1    1.1920e+02    5.8400e+02 ;    C74 - C78    - O26   
   150    149    156      1    1.2001e+02    4.0551e+02 ;    H51 - C74    - C78   
   151    153    154      1    1.1997e+02    5.6216e+02 ;    C75 - C76    - C77   
   152    151    153      1    1.2001e+02    4.0551e+02 ;    H52 - C75    - C76   
   153    154    155      1    1.2001e+02    4.0551e+02 ;    C76 - C77    - H53   
   153    154    156      1    1.1997e+02    5.6216e+02 ;    C76 - C77    - C78   
   154    156    157      1    1.1920e+02    5.8400e+02 ;    C77 - C78    - O26   
   155    154    156      1    1.2001e+02    4.0551e+02 ;    H53 - C77    - C78   
   156    157    158      1    1.1995e+02    5.2978e+02 ;    C78 - O26    - C79   
   157    158    159      1    1.1920e+02    5.8400e+02 ;    O26 - C79    - C80   
   157    158    167      1    1.1920e+02    5.8400e+02 ;    O26 - C79    - C84   
   158    159    160      1    1.1997e+02    5.6216e+02 ;    C79 - C80    - C81   
   158    159    166      1    1.2001e+02    4.0551e+02 ;    C79 - C80    - H55   
   158    167    168      1    1.2063e+02    5.3421e+02 ;    C79 - C84    - C85   
   158    167    172      1    1.1997e+02    5.6216e+02 ;    C79 - C84    - C86   
   159    158    167      1    1.1997e+02    5.6216e+02 ;    C80 - C79    - C84   
   159    160    161      1    1.1997e+02    5.6216e+02 ;    C80 - C81    - C82   
   159    160    163      1    1.2014e+02    5.4091e+02 ;    C80 - C81    - C83   
   160    159    166      1    1.2001e+02    4.0551e+02 ;    C81 - C80    - H55   
   160    161    162      1    1.2001e+02    4.0551e+02 ;    C81 - C82    - H54   
   160    161    172      1    1.1997e+02    5.6216e+02 ;    C81 - C82    - C86   
   160    163    164      1    1.2344e+02    5.7463e+02 ;    C81 - C83    - O27   
   160    163    165      1    1.2344e+02    5.7463e+02 ;    C81 - C83    - O28   
   161    160    163      1    1.2014e+02    5.4091e+02 ;    C82 - C81    - C83   
   161    172    167      1    1.1997e+02    5.6216e+02 ;    C82 - C86    - C84   
   161    172    173      1    1.1920e+02    5.8400e+02 ;    C82 - C86    - O29   
   162    161    172      1    1.2001e+02    4.0551e+02 ;    H54 - C82    - C86   
   164    163    165      1    1.3038e+02    6.5413e+02 ;    O27 - C83    - O28   
   167    168    169      1    1.1015e+02    3.9296e+02 ;    C84 - C85    - H56   
   167    168    170      1    1.1015e+02    3.9296e+02 ;    C84 - C85    - H57   
   167    168    171      1    1.1015e+02    3.9296e+02 ;    C84 - C85    - H58   
   167    172    173      1    1.1920e+02    5.8400e+02 ;    C84 - C86    - O29   
   168    167    172      1    1.2063e+02    5.3421e+02 ;    C85 - C84    - C86   
   169    168    170      1    1.0835e+02    3.2995e+02 ;    H56 - C85    - H57   
   169    168    171      1    1.0835e+02    3.2995e+02 ;    H56 - C85    - H58   
   170    168    171      1    1.0835e+02    3.2995e+02 ;    H57 - C85    - H58   
   172    173    174      1    1.1995e+02    5.2978e+02 ;    C86 - O29    - C87   
   173    174    175      1    1.1920e+02    5.8400e+02 ;    O29 - C87    - C88   
   173    174    177      1    1.1920e+02    5.8400e+02 ;    O29 - C87    - C89   
   174    175    176      1    1.2001e+02    4.0551e+02 ;    C87 - C88    - H59   
   174    175    182      1    1.1997e+02    5.6216e+02 ;    C87 - C88    - C92   
   174    177    178      1    1.2001e+02    4.0551e+02 ;    C87 - C89    - H60   
   174    177    179      1    1.1997e+02    5.6216e+02 ;    C87 - C89    - C90   
   175    174    177      1    1.1997e+02    5.6216e+02 ;    C88 - C87    - C89   
   175    182    180      1    1.1997e+02    5.6216e+02 ;    C88 - C92    - C91   
   175    182    183      1    1.1920e+02    5.8400e+02 ;    C88 - C92    - O30   
   176    175    182      1    1.2001e+02    4.0551e+02 ;    H59 - C88    - C92   
   177    179    180      1    1.1997e+02    5.6216e+02 ;    C89 - C90    - C91   
   178    177    179      1    1.2001e+02    4.0551e+02 ;    H60 - C89    - C90   
   179    180    181      1    1.2001e+02    4.0551e+02 ;    C90 - C91    - H61   
   179    180    182      1    1.1997e+02    5.6216e+02 ;    C90 - C91    - C92   
   180    182    183      1    1.1920e+02    5.8400e+02 ;    C91 - C92    - O30   
   181    180    182      1    1.2001e+02    4.0551e+02 ;    H61 - C91    - C92   
   182    183    184      1    1.1995e+02    5.2978e+02 ;    C92 - O30    - C93   
   183    184    185      1    1.1920e+02    5.8400e+02 ;    O30 - C93    - C94   
   183    184    187      1    1.1920e+02    5.8400e+02 ;    O30 - C93    - C95   
   184    185    186      1    1.2001e+02    4.0551e+02 ;    C93 - C94    - H62   
   184    185    195      1    1.1997e+02    5.6216e+02 ;    C93 - C94    - C99   
   184    187    188      1    1.2063e+02    5.3421e+02 ;    C93 - C95    - C96   
   184    187    192      1    1.1997e+02    5.6216e+02 ;    C93 - C95    - C97   
   185    184    187      1    1.1997e+02    5.6216e+02 ;    C94 - C93    - C95   
   185    195    193      1    1.1997e+02    5.6216e+02 ;    C94 - C99    - C98   
   185    195    196      1    1.2014e+02    5.4091e+02 ;    C94 - C99    - C100  
   186    185    195      1    1.2001e+02    4.0551e+02 ;    H62 - C94    - C99   
   187    188    189      1    1.1015e+02    3.9296e+02 ;    C95 - C96    - H63   
   187    188    190      1    1.1015e+02    3.9296e+02 ;    C95 - C96    - H64   
   187    188    191      1    1.1015e+02    3.9296e+02 ;    C95 - C96    - H65   
   187    192    193      1    1.1997e+02    5.6216e+02 ;    C95 - C97    - C98   
   188    187    192      1    1.2063e+02    5.3421e+02 ;    C96 - C95    - C97   
   189    188    190      1    1.0835e+02    3.2995e+02 ;    H63 - C96    - H64   
   189    188    191      1    1.0835e+02    3.2995e+02 ;    H63 - C96    - H65   
   190    188    191      1    1.0835e+02    3.2995e+02 ;    H64 - C96    - H65   
   192    193    194      1    1.2001e+02    4.0551e+02 ;    C97 - C98    - H66   
   192    193    195      1    1.1997e+02    5.6216e+02 ;    C97 - C98    - C99   
   193    195    196      1    1.2014e+02    5.4091e+02 ;    C98 - C99    - C100  
   194    193    195      1    1.2001e+02    4.0551e+02 ;    H66 - C98    - C99   
   195    196    197      1    1.2344e+02    5.7463e+02 ;    C99 - C100   - O31   
   195    196    198      1    1.2344e+02    5.7463e+02 ;    C99 - C100   - O32   
   197    196    198      1    1.3038e+02    6.5413e+02 ;    O31 - C100   - O32   

[ dihedrals ] ; propers
; treated as RBs in GROMACS to use combine multiple AMBER torsions per quartet
;    i      j      k      l   func    C0         C1         C2         C3         C4         C5
     1      2      3      4      3   27.19600   -7.94960  -19.24640    0.00000    0.00000    0.00000 ;     O1-    C1-    O2-    H1
     1      2      5      6      3    3.68192   -4.35136    0.00000    1.33888    0.00000    0.00000 ;     O1-    C1-    C2-    H2
     1      2      5      7      3    3.68192   -4.35136    0.00000    1.33888    0.00000    0.00000 ;     O1-    C1-    C2-    H3
     1      2      5      8      3    0.00000    0.00000    0.00000    0.00000    0.00000    0.00000 ;     O1-    C1-    C2-    C3
     2      5      8      9      3    0.65084    1.95253    0.00000   -2.60338    0.00000    0.00000 ;     C1-    C2-    C3-    H4
     2      5      8     10      3    0.65084    1.95253    0.00000   -2.60338    0.00000    0.00000 ;     C1-    C2-    C3-    H5
     2      5      8     11      3    0.65084    1.95253    0.00000   -2.60338    0.00000    0.00000 ;     C1-    C2-    C3-    C4
     3      2      5      6      3    0.00000    0.00000    0.00000    0.00000    0.00000    0.00000 ;     O2-    C1-    C2-    H2
     3      2      5      7      3    0.00000    0.00000    0.00000    0.00000    0.00000    0.00000 ;     O2-    C1-    C2-    H3
     3      2      5      8      3    0.00000    0.00000    0.00000    0.00000    0.00000    0.00000 ;     O2-    C1-    C2-    C3
     4      3      2      5      3   19.24640    0.00000  -19.24640    0.00000    0.00000    0.00000 ;     H1-    O2-    C1-    C2
     5      8     11     12      3    0.66944    2.00832    0.00000   -2.67776    0.00000    0.00000 ;     C2-    C3-    C4-    H6
     5      8     11     13      3    0.65084    1.95253    0.00000   -2.60338    0.00000    0.00000 ;     C2-    C3-    C4-    C5
     5      8     11     16      3    0.65084    1.95253    0.00000   -2.60338    0.00000    0.00000 ;     C2-    C3-    C4-    C7
     6      5      8      9      3    0.62760    1.88280    0.00000   -2.51040    0.00000    0.00000 ;     H2-    C2-    C3-    H4
     6      5      8     10      3    0.62760    1.88280    0.00000   -2.51040    0.00000    0.00000 ;     H2-    C2-    C3-    H5
     6      5      8     11      3    0.66944    2.00832    0.00000   -2.67776    0.00000    0.00000 ;     H2-    C2-    C3-    C4
     7      5      8      9      3    0.62760    1.88280    0.00000   -2.51040    0.00000    0.00000 ;     H3-    C2-    C3-    H4
     7      5      8     10      3    0.62760    1.88280    0.00000   -2.51040    0.00000    0.00000 ;     H3-    C2-    C3-    H5
     7      5      8     11      3    0.66944    2.00832    0.00000   -2.67776    0.00000    0.00000 ;     H3-    C2-    C3-    C4
     8     11     13     14      3    0.00000    0.00000    0.00000    0.00000    0.00000    0.00000 ;     C3-    C4-    C5-    C6
     8     11     13     67      3    0.00000    0.00000    0.00000    0.00000    0.00000    0.00000 ;     C3-    C4-    C5-   C31
     8     11     16     17      3    0.00000    0.00000    0.00000    0.00000    0.00000    0.00000 ;     C3-    C4-    C7-    C8
     8     11     16     72      3    0.00000    0.00000    0.00000    0.00000    0.00000    0.00000 ;     C3-    C4-    C7-   C33
     9      8     11     12      3    0.62760    1.88280    0.00000   -2.51040    0.00000    0.00000 ;     H4-    C3-    C4-    H6
     9      8     11     13      3    0.65084    1.95253    0.00000   -2.60338    0.00000    0.00000 ;     H4-    C3-    C4-    C5
     9      8     11     16      3    0.65084    1.95253    0.00000   -2.60338    0.00000    0.00000 ;     H4-    C3-    C4-    C7
    10      8     11     12      3    0.62760    1.88280    0.00000   -2.51040    0.00000    0.00000 ;     H5-    C3-    C4-    H6
    10      8     11     13      3    0.65084    1.95253    0.00000   -2.60338    0.00000    0.00000 ;     H5-    C3-    C4-    C5
    10      8     11     16      3    0.65084    1.95253    0.00000   -2.60338    0.00000    0.00000 ;     H5-    C3-    C4-    C7
    11     13     14     15      3   30.33400    0.00000  -30.33400    0.00000    0.00000    0.00000 ;     C4-    C5-    C6-    H7
    11     13     14     62      3   30.33400    0.00000  -30.33400    0.00000    0.00000    0.00000 ;     C4-    C5-    C6-   C28
    11     13     67     65      3   30.33400    0.00000  -30.33400    0.00000    0.00000    0.00000 ;     C4-    C5-   C31-   C30
    11     13     67     68      3   30.33400    0.00000  -30.33400    0.00000    0.00000    0.00000 ;     C4-    C5-   C31-   O10
    11     16     17     18      3   30.33400    0.00000  -30.33400    0.00000    0.00000    0.00000 ;     C4-    C7-    C8-    H8
    11     16     17     19      3   30.33400    0.00000  -30.33400    0.00000    0.00000    0.00000 ;     C4-    C7-    C8-    C9
    11     16     72     71      3   30.33400    0.00000  -30.33400    0.00000    0.00000    0.00000 ;     C4-    C7-   C33-   O11
    11     16     72     73      3   30.33400    0.00000  -30.33400    0.00000    0.00000    0.00000 ;     C4-    C7-   C33-   C34
    12     11     13     14      3    0.00000    0.00000    0.00000    0.00000    0.00000    0.00000 ;     H6-    C4-    C5-    C6
    12     11     13     67      3    0.00000    0.00000    0.00000    0.00000    0.00000    0.00000 ;     H6-    C4-    C5-   C31
    12     11     16     17      3    0.00000    0.00000    0.00000    0.00000    0.00000    0.00000 ;     H6-    C4-    C7-    C8
    12     11     16     72      3    0.00000    0.00000    0.00000    0.00000    0.00000    0.00000 ;     H6-    C4-    C7-   C33
    13     11     16     17      3    0.00000    0.00000    0.00000    0.00000    0.00000    0.00000 ;     C5-    C4-    C7-    C8
    13     11     16     72      3    0.00000    0.00000    0.00000    0.00000    0.00000    0.00000 ;     C5-    C4-    C7-   C33
    13     14     62     51      3   30.33400    0.00000  -30.33400    0.00000    0.00000    0.00000 ;     C5-    C6-   C28-   C24
    13     14     62     63      3   30.33400    0.00000  -30.33400    0.00000    0.00000    0.00000 ;     C5-    C6-   C28-   C29
    13     67     65     63      3   30.33400    0.00000  -30.33400    0.00000    0.00000    0.00000 ;     C5-   C31-   C30-   C29
    13     67     65     66      3   30.33400    0.00000  -30.33400    0.00000    0.00000    0.00000 ;     C5-   C31-   C30-   H27
    13     67     68     69      3    7.53120    0.00000   -7.53120    0.00000    0.00000    0.00000 ;     C5-   C31-   O10-   C32
    14     13     11     16      3    0.00000    0.00000    0.00000    0.00000    0.00000    0.00000 ;     C6-    C5-    C4-    C7
    14     13     67     65      3   30.33400    0.00000  -30.33400    0.00000    0.00000    0.00000 ;     C6-    C5-   C31-   C30
    14     13     67     68      3   30.33400    0.00000  -30.33400    0.00000    0.00000    0.00000 ;     C6-    C5-   C31-   O10
    14     62     51     50      3    0.00000    0.00000    0.00000    0.00000    0.00000    0.00000 ;     C6-   C28-   C24-   C23
    14     62     51     52      3    0.00000    0.00000    0.00000    0.00000    0.00000    0.00000 ;     C6-   C28-   C24-   H22
    14     62     51     53      3    0.00000    0.00000    0.00000    0.00000    0.00000    0.00000 ;     C6-   C28-   C24-   C25
    14     62     63     64      3   30.33400    0.00000  -30.33400    0.00000    0.00000    0.00000 ;     C6-   C28-   C29-    O9
    14     62     63     65      3   30.33400    0.00000  -30.33400    0.00000    0.00000    0.00000 ;     C6-   C28-   C29-   C30
    15     14     13     67      3   30.33400    0.00000  -30.33400    0.00000    0.00000    0.00000 ;     H7-    C6-    C5-   C31
    15     14     62     51      3   30.33400    0.00000  -30.33400    0.00000    0.00000    0.00000 ;     H7-    C6-   C28-   C24
    15     14     62     63      3   30.33400    0.00000  -30.33400    0.00000    0.00000    0.00000 ;     H7-    C6-   C28-   C29
    16     11     13     67      3    0.00000    0.00000    0.00000    0.00000    0.00000    0.00000 ;     C7-    C4-    C5-   C31
    16     17     19     20      3   30.33400    0.00000  -30.33400    0.00000    0.00000    0.00000 ;     C7-    C8-    C9-   C10
    16     17     19     75      3   30.33400    0.00000  -30.33400    0.00000    0.00000    0.00000 ;     C7-    C8-    C9-   C35
    16     72     71     69      3    7.53120    0.00000   -7.53120    0.00000    0.00000    0.00000 ;     C7-   C33-   O11-   C32
    16     72     73     74      3   30.33400    0.00000  -30.33400    0.00000    0.00000    0.00000 ;     C7-   C33-   C34-   H29
    16     72     73     75      3   30.33400    0.00000  -30.33400    0.00000    0.00000    0.00000 ;     C7-   C33-   C34-   C35
    17     16     72     71      3   30.33400    0.00000  -30.33400    0.00000    0.00000    0.00000 ;     C8-    C7-   C33-   O11
    17     16     72     73      3   30.33400    0.00000  -30.33400    0.00000    0.00000    0.00000 ;     C8-    C7-   C33-   C34
    17     19     20     21      3    0.00000    0.00000    0.00000    0.00000    0.00000    0.00000 ;     C8-    C9-   C10-   C11
    17     19     20     30      3    0.00000    0.00000    0.00000    0.00000    0.00000    0.00000 ;     C8-    C9-   C10-   H13
    17     19     20     31      3    0.00000    0.00000    0.00000    0.00000    0.00000    0.00000 ;     C8-    C9-   C10-   C14
    17     19     75     73      3   30.33400    0.00000  -30.33400    0.00000    0.00000    0.00000 ;     C8-    C9-   C35-   C34
    17     19     75     76      3   30.33400    0.00000  -30.33400    0.00000    0.00000    0.00000 ;     C8-    C9-   C35-   O12
    18     17     16     72      3   30.33400    0.00000  -30.33400    0.00000    0.00000    0.00000 ;     H8-    C8-    C7-   C33
    18     17     19     20      3   30.33400    0.00000  -30.33400    0.00000    0.00000    0.00000 ;     H8-    C8-    C9-   C10
    18     17     19     75      3   30.33400    0.00000  -30.33400    0.00000    0.00000    0.00000 ;     H8-    C8-    C9-   C35
    19     17     16     72      3   30.33400    0.00000  -30.33400    0.00000    0.00000    0.00000 ;     C9-    C8-    C7-   C33
    19     20     21     22      3    0.65084    1.95253    0.00000   -2.60338    0.00000    0.00000 ;     C9-   C10-   C11-   C12
    19     20     21     28      3    0.65084    1.95253    0.00000   -2.60338    0.00000    0.00000 ;     C9-   C10-   C11-   H11
    19     20     21     29      3    0.65084    1.95253    0.00000   -2.60338    0.00000    0.00000 ;     C9-   C10-   C11-   H12
    19     20     31     32      3    0.00000    0.00000    0.00000    0.00000    0.00000    0.00000 ;     C9-   C10-   C14-   C15
    19     20     31     80      3    0.00000    0.00000    0.00000    0.00000    0.00000    0.00000 ;     C9-   C10-   C14-   C37
    19     75     73     72      3   30.33400    0.00000  -30.33400    0.00000    0.00000    0.00000 ;     C9-   C35-   C34-   C33
    19     75     73     74      3   30.33400    0.00000  -30.33400    0.00000    0.00000    0.00000 ;     C9-   C35-   C34-   H29
    19     75     76     77      3    7.53120    0.00000   -7.53120    0.00000    0.00000    0.00000 ;     C9-   C35-   O12-   C36
    20     19     75     73      3   30.33400    0.00000  -30.33400    0.00000    0.00000    0.00000 ;    C10-    C9-   C35-   C34
    20     19     75     76      3   30.33400    0.00000  -30.33400    0.00000    0.00000    0.00000 ;    C10-    C9-   C35-   O12
    20     21     22     23      3    0.65084    1.95253    0.00000   -2.60338    0.00000    0.00000 ;    C10-   C11-   C12-   C13
    20     21     22     26      3    0.66944    2.00832    0.00000   -2.67776    0.00000    0.00000 ;    C10-   C11-   C12-    H9
    20     21     22     27      3    0.66944    2.00832    0.00000   -2.67776    0.00000    0.00000 ;    C10-   C11-   C12-   H10
    20     31     32     33      3   30.33400    0.00000  -30.33400    0.00000    0.00000    0.00000 ;    C10-   C14-   C15-   H14
    20     31     32     34      3   30.33400    0.00000  -30.33400    0.00000    0.00000    0.00000 ;    C10-   C14-   C15-   C16
    20     31     80     79      3   30.33400    0.00000  -30.33400    0.00000    0.00000    0.00000 ;    C10-   C14-   C37-   O13
    20     31     80     81      3   30.33400    0.00000  -30.33400    0.00000    0.00000    0.00000 ;    C10-   C14-   C37-   C38
    21     20     19     75      3    0.00000    0.00000    0.00000    0.00000    0.00000    0.00000 ;    C11-   C10-    C9-   C35
    21     20     31     32      3    0.00000    0.00000    0.00000    0.00000    0.00000    0.00000 ;    C11-   C10-   C14-   C15
    21     20     31     80      3    0.00000    0.00000    0.00000    0.00000    0.00000    0.00000 ;    C11-   C10-   C14-   C37
    21     22     23     24      3    0.00000    0.00000    0.00000    0.00000    0.00000    0.00000 ;    C11-   C12-   C13-    O3
    21     22     23     25      3    0.00000    0.00000    0.00000    0.00000    0.00000    0.00000 ;    C11-   C12-   C13-    O4
    22     21     20     30      3    0.66944    2.00832    0.00000   -2.67776    0.00000    0.00000 ;    C12-   C11-   C10-   H13
    22     21     20     31      3    0.65084    1.95253    0.00000   -2.60338    0.00000    0.00000 ;    C12-   C11-   C10-   C14
    23     22     21     28      3    0.65084    1.95253    0.00000   -2.60338    0.00000    0.00000 ;    C13-   C12-   C11-   H11
    23     22     21     29      3    0.65084    1.95253    0.00000   -2.60338    0.00000    0.00000 ;    C13-   C12-   C11-   H12
    24     23     22     26      3    3.68192   -4.35136    0.00000    1.33888    0.00000    0.00000 ;     O3-   C13-   C12-    H9
    24     23     22     27      3    3.68192   -4.35136    0.00000    1.33888    0.00000    0.00000 ;     O3-   C13-   C12-   H10
    25     23     22     26      3    3.68192   -4.35136    0.00000    1.33888    0.00000    0.00000 ;     O4-   C13-   C12-    H9
    25     23     22     27      3    3.68192   -4.35136    0.00000    1.33888    0.00000    0.00000 ;     O4-   C13-   C12-   H10
    26     22     21     28      3    0.62760    1.88280    0.00000   -2.51040    0.00000    0.00000 ;     H9-   C12-   C11-   H11
    26     22     21     29      3    0.62760    1.88280    0.00000   -2.51040    0.00000    0.00000 ;     H9-   C12-   C11-   H12
    27     22     21     28      3    0.62760    1.88280    0.00000   -2.51040    0.00000    0.00000 ;    H10-   C12-   C11-   H11
    27     22     21     29      3    0.62760    1.88280    0.00000   -2.51040    0.00000    0.00000 ;    H10-   C12-   C11-   H12
    28     21     20     30      3    0.62760    1.88280    0.00000   -2.51040    0.00000    0.00000 ;    H11-   C11-   C10-   H13
    28     21     20     31      3    0.65084    1.95253    0.00000   -2.60338    0.00000    0.00000 ;    H11-   C11-   C10-   C14
    29     21     20     30      3    0.62760    1.88280    0.00000   -2.51040    0.00000    0.00000 ;    H12-   C11-   C10-   H13
    29     21     20     31      3    0.65084    1.95253    0.00000   -2.60338    0.00000    0.00000 ;    H12-   C11-   C10-   C14
    30     20     19     75      3    0.00000    0.00000    0.00000    0.00000    0.00000    0.00000 ;    H13-   C10-    C9-   C35
    30     20     31     32      3    0.00000    0.00000    0.00000    0.00000    0.00000    0.00000 ;    H13-   C10-   C14-   C15
    30     20     31     80      3    0.00000    0.00000    0.00000    0.00000    0.00000    0.00000 ;    H13-   C10-   C14-   C37
    31     20     19     75      3    0.00000    0.00000    0.00000    0.00000    0.00000    0.00000 ;    C14-   C10-    C9-   C35
    31     32     34     35      3   30.33400    0.00000  -30.33400    0.00000    0.00000    0.00000 ;    C14-   C15-   C16-   C17
    31     32     34     83      3   30.33400    0.00000  -30.33400    0.00000    0.00000    0.00000 ;    C14-   C15-   C16-   C39
    31     80     79     77      3    7.53120    0.00000   -7.53120    0.00000    0.00000    0.00000 ;    C14-   C37-   O13-   C36
    31     80     81     82      3   30.33400    0.00000  -30.33400    0.00000    0.00000    0.00000 ;    C14-   C37-   C38-   H31
    31     80     81     83      3   30.33400    0.00000  -30.33400    0.00000    0.00000    0.00000 ;    C14-   C37-   C38-   C39
    32     31     80     79      3   30.33400    0.00000  -30.33400    0.00000    0.00000    0.00000 ;    C15-   C14-   C37-   O13
    32     31     80     81      3   30.33400    0.00000  -30.33400    0.00000    0.00000    0.00000 ;    C15-   C14-   C37-   C38
    32     34     35     36      3    0.00000    0.00000    0.00000    0.00000    0.00000    0.00000 ;    C15-   C16-   C17-   H15
    32     34     35     37      3    0.00000    0.00000    0.00000    0.00000    0.00000    0.00000 ;    C15-   C16-   C17-   C18
    32     34     35     47      3    0.00000    0.00000    0.00000    0.00000    0.00000    0.00000 ;    C15-   C16-   C17-   C21
    32     34     83     81      3   30.33400    0.00000  -30.33400    0.00000    0.00000    0.00000 ;    C15-   C16-   C39-   C38
    32     34     83     84      3   30.33400    0.00000  -30.33400    0.00000    0.00000    0.00000 ;    C15-   C16-   C39-   O14
    33     32     31     80      3   30.33400    0.00000  -30.33400    0.00000    0.00000    0.00000 ;    H14-   C15-   C14-   C37
    33     32     34     35      3   30.33400    0.00000  -30.33400    0.00000    0.00000    0.00000 ;    H14-   C15-   C16-   C17
    33     32     34     83      3   30.33400    0.00000  -30.33400    0.00000    0.00000    0.00000 ;    H14-   C15-   C16-   C39
    34     32     31     80      3   30.33400    0.00000  -30.33400    0.00000    0.00000    0.00000 ;    C16-   C15-   C14-   C37
    34     35     37     38      3    0.65084    1.95253    0.00000   -2.60338    0.00000    0.00000 ;    C16-   C17-   C18-   H16
    34     35     37     39      3    0.65084    1.95253    0.00000   -2.60338    0.00000    0.00000 ;    C16-   C17-   C18-   C19
    34     35     37     46      3    0.65084    1.95253    0.00000   -2.60338    0.00000    0.00000 ;    C16-   C17-   C18-   H20
    34     35     47     48      3    0.00000    0.00000    0.00000    0.00000    0.00000    0.00000 ;    C16-   C17-   C21-   C22
    34     35     47     88      3    0.00000    0.00000    0.00000    0.00000    0.00000    0.00000 ;    C16-   C17-   C21-   C41
    34     83     81     80      3   30.33400    0.00000  -30.33400    0.00000    0.00000    0.00000 ;    C16-   C39-   C38-   C37
    34     83     81     82      3   30.33400    0.00000  -30.33400    0.00000    0.00000    0.00000 ;    C16-   C39-   C38-   H31
    34     83     84     85      3    7.53120    0.00000   -7.53120    0.00000    0.00000    0.00000 ;    C16-   C39-   O14-   C40
    35     34     83     81      3   30.33400    0.00000  -30.33400    0.00000    0.00000    0.00000 ;    C17-   C16-   C39-   C38
    35     34     83     84      3   30.33400    0.00000  -30.33400    0.00000    0.00000    0.00000 ;    C17-   C16-   C39-   O14
    35     37     39     40      3    0.66944    2.00832    0.00000   -2.67776    0.00000    0.00000 ;    C17-   C18-   C19-   H17
    35     37     39     41      3    0.66944    2.00832    0.00000   -2.67776    0.00000    0.00000 ;    C17-   C18-   C19-   H18
    35     37     39     42      3    0.65084    1.95253    0.00000   -2.60338    0.00000    0.00000 ;    C17-   C18-   C19-   C20
    35     47     48     49      3   30.33400    0.00000  -30.33400    0.00000    0.00000    0.00000 ;    C17-   C21-   C22-   H21
    35     47     48     50      3   30.33400    0.00000  -30.33400    0.00000    0.00000    0.00000 ;    C17-   C21-   C22-   C23
    35     47     88     87      3   30.33400    0.00000  -30.33400    0.00000    0.00000    0.00000 ;    C17-   C21-   C41-   O15
    35     47     88     89      3   30.33400    0.00000  -30.33400    0.00000    0.00000    0.00000 ;    C17-   C21-   C41-   C42
    36     35     34     83      3    0.00000    0.00000    0.00000    0.00000    0.00000    0.00000 ;    H15-   C17-   C16-   C39
    36     35     37     38      3    0.62760    1.88280    0.00000   -2.51040    0.00000    0.00000 ;    H15-   C17-   C18-   H16
    36     35     37     39      3    0.66944    2.00832    0.00000   -2.67776    0.00000    0.00000 ;    H15-   C17-   C18-   C19
    36     35     37     46      3    0.62760    1.88280    0.00000   -2.51040    0.00000    0.00000 ;    H15-   C17-   C18-   H20
    36     35     47     48      3    0.00000    0.00000    0.00000    0.00000    0.00000    0.00000 ;    H15-   C17-   C21-   C22
    36     35     47     88      3    0.00000    0.00000    0.00000    0.00000    0.00000    0.00000 ;    H15-   C17-   C21-   C41
    37     35     34     83      3    0.00000    0.00000    0.00000    0.00000    0.00000    0.00000 ;    C18-   C17-   C16-   C39
    37     35     47     48      3    0.00000    0.00000    0.00000    0.00000    0.00000    0.00000 ;    C18-   C17-   C21-   C22
    37     35     47     88      3    0.00000    0.00000    0.00000    0.00000    0.00000    0.00000 ;    C18-   C17-   C21-   C41
    37     39     42     43      3    0.00000    0.00000    0.00000    0.00000    0.00000    0.00000 ;    C18-   C19-   C20-    O5
    37     39     42     44      3    0.00000    0.00000    0.00000    0.00000    0.00000    0.00000 ;    C18-   C19-   C20-    O6
    38     37     35     47      3    0.65084    1.95253    0.00000   -2.60338    0.00000    0.00000 ;    H16-   C18-   C17-   C21
    38     37     39     40      3    0.62760    1.88280    0.00000   -2.51040    0.00000    0.00000 ;    H16-   C18-   C19-   H17
    38     37     39     41      3    0.62760    1.88280    0.00000   -2.51040    0.00000    0.00000 ;    H16-   C18-   C19-   H18
    38     37     39     42      3    0.65084    1.95253    0.00000   -2.60338    0.00000    0.00000 ;    H16-   C18-   C19-   C20
    39     37     35     47      3    0.65084    1.95253    0.00000   -2.60338    0.00000    0.00000 ;    C19-   C18-   C17-   C21
    39     42     44     45      3   19.24640    0.00000  -19.24640    0.00000    0.00000    0.00000 ;    C19-   C20-    O6-   H19
    40     39     37     46      3    0.62760    1.88280    0.00000   -2.51040    0.00000    0.00000 ;    H17-   C19-   C18-   H20
    40     39     42     43      3    3.68192   -4.35136    0.00000    1.33888    0.00000    0.00000 ;    H17-   C19-   C20-    O5
    40     39     42     44      3    0.00000    0.00000    0.00000    0.00000    0.00000    0.00000 ;    H17-   C19-   C20-    O6
    41     39     37     46      3    0.62760    1.88280    0.00000   -2.51040    0.00000    0.00000 ;    H18-   C19-   C18-   H20
    41     39     42     43      3    3.68192   -4.35136    0.00000    1.33888    0.00000    0.00000 ;    H18-   C19-   C20-    O5
    41     39     42     44      3    0.00000    0.00000    0.00000    0.00000    0.00000    0.00000 ;    H18-   C19-   C20-    O6
    42     39     37     46      3    0.65084    1.95253    0.00000   -2.60338    0.00000    0.00000 ;    C20-   C19-   C18-   H20
    43     42     44     45      3   27.19600   -7.94960  -19.24640    0.00000    0.00000    0.00000 ;     O5-   C20-    O6-   H19
    46     37     35     47      3    0.65084    1.95253    0.00000   -2.60338    0.00000    0.00000 ;    H20-   C18-   C17-   C21
    47     35     34     83      3    0.00000    0.00000    0.00000    0.00000    0.00000    0.00000 ;    C21-   C17-   C16-   C39
    47     48     50     51      3   30.33400    0.00000  -30.33400    0.00000    0.00000    0.00000 ;    C21-   C22-   C23-   C24
    47     48     50     91      3   30.33400    0.00000  -30.33400    0.00000    0.00000    0.00000 ;    C21-   C22-   C23-   C43
    47     88     87     85      3    7.53120    0.00000   -7.53120    0.00000    0.00000    0.00000 ;    C21-   C41-   O15-   C40
    47     88     89     90      3   30.33400    0.00000  -30.33400    0.00000    0.00000    0.00000 ;    C21-   C41-   C42-   H33
    47     88     89     91      3   30.33400    0.00000  -30.33400    0.00000    0.00000    0.00000 ;    C21-   C41-   C42-   C43
    48     47     88     87      3   30.33400    0.00000  -30.33400    0.00000    0.00000    0.00000 ;    C22-   C21-   C41-   O15
    48     47     88     89      3   30.33400    0.00000  -30.33400    0.00000    0.00000    0.00000 ;    C22-   C21-   C41-   C42
    48     50     51     52      3    0.00000    0.00000    0.00000    0.00000    0.00000    0.00000 ;    C22-   C23-   C24-   H22
    48     50     51     53      3    0.00000    0.00000    0.00000    0.00000    0.00000    0.00000 ;    C22-   C23-   C24-   C25
    48     50     51     62      3    0.00000    0.00000    0.00000    0.00000    0.00000    0.00000 ;    C22-   C23-   C24-   C28
    48     50     91     89      3   30.33400    0.00000  -30.33400    0.00000    0.00000    0.00000 ;    C22-   C23-   C43-   C42
    48     50     91     92      3   30.33400    0.00000  -30.33400    0.00000    0.00000    0.00000 ;    C22-   C23-   C43-   O16
    49     48     47     88      3   30.33400    0.00000  -30.33400    0.00000    0.00000    0.00000 ;    H21-   C22-   C21-   C41
    49     48     50     51      3   30.33400    0.00000  -30.33400    0.00000    0.00000    0.00000 ;    H21-   C22-   C23-   C24
    49     48     50     91      3   30.33400    0.00000  -30.33400    0.00000    0.00000    0.00000 ;    H21-   C22-   C23-   C43
    50     48     47     88      3   30.33400    0.00000  -30.33400    0.00000    0.00000    0.00000 ;    C23-   C22-   C21-   C41
    50     51     53     54      3    0.65084    1.95253    0.00000   -2.60338    0.00000    0.00000 ;    C23-   C24-   C25-   H23
    50     51     53     55      3    0.65084    1.95253    0.00000   -2.60338    0.00000    0.00000 ;    C23-   C24-   C25-   C26
    50     51     53     61      3    0.65084    1.95253    0.00000   -2.60338    0.00000    0.00000 ;    C23-   C24-   C25-   H26
    50     51     62     63      3    0.00000    0.00000    0.00000    0.00000    0.00000    0.00000 ;    C23-   C24-   C28-   C29
    50     91     89     88      3   30.33400    0.00000  -30.33400    0.00000    0.00000    0.00000 ;    C23-   C43-   C42-   C41
    50     91     89     90      3   30.33400    0.00000  -30.33400    0.00000    0.00000    0.00000 ;    C23-   C43-   C42-   H33
    50     91     92     93      3    7.53120    0.00000   -7.53120    0.00000    0.00000    0.00000 ;    C23-   C43-   O16-   C44
    51     50     91     89      3   30.33400    0.00000  -30.33400    0.00000    0.00000    0.00000 ;    C24-   C23-   C43-   C42
    51     50     91     92      3   30.33400    0.00000  -30.33400    0.00000    0.00000    0.00000 ;    C24-   C23-   C43-   O16
    51     53     55     56      3    0.66944    2.00832    0.00000   -2.67776    0.00000    0.00000 ;    C24-   C25-   C26-   H24
    51     53     55     57      3    0.66944    2.00832    0.00000   -2.67776    0.00000    0.00000 ;    C24-   C25-   C26-   H25
    51     53     55     58      3    0.65084    1.95253    0.00000   -2.60338    0.00000    0.00000 ;    C24-   C25-   C26-   C27
    51     62     63     64      3   30.33400    0.00000  -30.33400    0.00000    0.00000    0.00000 ;    C24-   C28-   C29-    O9
    51     62     63     65      3   30.33400    0.00000  -30.33400    0.00000    0.00000    0.00000 ;    C24-   C28-   C29-   C30
    52     51     50     91      3    0.00000    0.00000    0.00000    0.00000    0.00000    0.00000 ;    H22-   C24-   C23-   C43
    52     51     53     54      3    0.62760    1.88280    0.00000   -2.51040    0.00000    0.00000 ;    H22-   C24-   C25-   H23
    52     51     53     55      3    0.66944    2.00832    0.00000   -2.67776    0.00000    0.00000 ;    H22-   C24-   C25-   C26
    52     51     53     61      3    0.62760    1.88280    0.00000   -2.51040    0.00000    0.00000 ;    H22-   C24-   C25-   H26
    52     51     62     63      3    0.00000    0.00000    0.00000    0.00000    0.00000    0.00000 ;    H22-   C24-   C28-   C29
    53     51     50     91      3    0.00000    0.00000    0.00000    0.00000    0.00000    0.00000 ;    C25-   C24-   C23-   C43
    53     51     62     63      3    0.00000    0.00000    0.00000    0.00000    0.00000    0.00000 ;    C25-   C24-   C28-   C29
    53     55     58     59      3    0.00000    0.00000    0.00000    0.00000    0.00000    0.00000 ;    C25-   C26-   C27-    O7
    53     55     58     60      3    0.00000    0.00000    0.00000    0.00000    0.00000    0.00000 ;    C25-   C26-   C27-    O8
    54     53     51     62      3    0.65084    1.95253    0.00000   -2.60338    0.00000    0.00000 ;    H23-   C25-   C24-   C28
    54     53     55     56      3    0.62760    1.88280    0.00000   -2.51040    0.00000    0.00000 ;    H23-   C25-   C26-   H24
    54     53     55     57      3    0.62760    1.88280    0.00000   -2.51040    0.00000    0.00000 ;    H23-   C25-   C26-   H25
    54     53     55     58      3    0.65084    1.95253    0.00000   -2.60338    0.00000    0.00000 ;    H23-   C25-   C26-   C27
    55     53     51     62      3    0.65084    1.95253    0.00000   -2.60338    0.00000    0.00000 ;    C26-   C25-   C24-   C28
    56     55     53     61      3    0.62760    1.88280    0.00000   -2.51040    0.00000    0.00000 ;    H24-   C26-   C25-   H26
    56     55     58     59      3    3.68192   -4.35136    0.00000    1.33888    0.00000    0.00000 ;    H24-   C26-   C27-    O7
    56     55     58     60      3    3.68192   -4.35136    0.00000    1.33888    0.00000    0.00000 ;    H24-   C26-   C27-    O8
    57     55     53     61      3    0.62760    1.88280    0.00000   -2.51040    0.00000    0.00000 ;    H25-   C26-   C25-   H26
    57     55     58     59      3    3.68192   -4.35136    0.00000    1.33888    0.00000    0.00000 ;    H25-   C26-   C27-    O7
    57     55     58     60      3    3.68192   -4.35136    0.00000    1.33888    0.00000    0.00000 ;    H25-   C26-   C27-    O8
    58     55     53     61      3    0.65084    1.95253    0.00000   -2.60338    0.00000    0.00000 ;    C27-   C26-   C25-   H26
    61     53     51     62      3    0.65084    1.95253    0.00000   -2.60338    0.00000    0.00000 ;    H26-   C25-   C24-   C28
    62     14     13     67      3   30.33400    0.00000  -30.33400    0.00000    0.00000    0.00000 ;    C28-    C6-    C5-   C31
    62     51     50     91      3    0.00000    0.00000    0.00000    0.00000    0.00000    0.00000 ;    C28-   C24-   C23-   C43
    62     63     64     93      3    7.53120    0.00000   -7.53120    0.00000    0.00000    0.00000 ;    C28-   C29-    O9-   C44
    62     63     65     66      3   30.33400    0.00000  -30.33400    0.00000    0.00000    0.00000 ;    C28-   C29-   C30-   H27
    62     63     65     67      3   30.33400    0.00000  -30.33400    0.00000    0.00000    0.00000 ;    C28-   C29-   C30-   C31
    63     64     93     92      3    1.60387    4.81160    0.00000   -6.41547    0.00000    0.00000 ;    C29-    O9-   C44-   O16
    63     64     93     94      3    1.60387    4.81160    0.00000   -6.41547    0.00000    0.00000 ;    C29-    O9-   C44-   H34
    63     64     93     95      3    1.60387    4.81160    0.00000   -6.41547    0.00000    0.00000 ;    C29-    O9-   C44-   C45
    63     65     67     68      3   30.33400    0.00000  -30.33400    0.00000    0.00000    0.00000 ;    C29-   C30-   C31-   O10
    64     63     65     66      3   30.33400    0.00000  -30.33400    0.00000    0.00000    0.00000 ;     O9-   C29-   C30-   H27
    64     63     65     67      3   30.33400    0.00000  -30.33400    0.00000    0.00000    0.00000 ;     O9-   C29-   C30-   C31
    64     93     92     91      3    1.60387    4.81160    0.00000   -6.41547    0.00000    0.00000 ;     O9-   C44-   O16-   C43
    64     93     95     96      3    0.00000    0.00000    0.00000    0.00000    0.00000    0.00000 ;     O9-   C44-   C45-   C46
    64     93     95     98      3    0.00000    0.00000    0.00000    0.00000    0.00000    0.00000 ;     O9-   C44-   C45-   C47
    65     63     64     93      3    7.53120    0.00000   -7.53120    0.00000    0.00000    0.00000 ;    C30-   C29-    O9-   C44
    65     67     68     69      3    7.53120    0.00000   -7.53120    0.00000    0.00000    0.00000 ;    C30-   C31-   O10-   C32
    66     65     67     68      3   30.33400    0.00000  -30.33400    0.00000    0.00000    0.00000 ;    H27-   C30-   C31-   O10
    67     68     69     70      3    1.60387    4.81160    0.00000   -6.41547    0.00000    0.00000 ;    C31-   O10-   C32-   H28
    67     68     69     71      3    1.60387    4.81160    0.00000   -6.41547    0.00000    0.00000 ;    C31-   O10-   C32-   O11
    67     68     69    179      3    1.60387    4.81160    0.00000   -6.41547    0.00000    0.00000 ;    C31-   O10-   C32-   C90
    68     69     71     72      3    1.60387    4.81160    0.00000   -6.41547    0.00000    0.00000 ;    O10-   C32-   O11-   C33
    68     69    179    177      3    0.00000    0.00000    0.00000    0.00000    0.00000    0.00000 ;    O10-   C32-   C90-   C89
    68     69    179    180      3    0.00000    0.00000    0.00000    0.00000    0.00000    0.00000 ;    O10-   C32-   C90-   C91
    69     71     72     73      3    7.53120    0.00000   -7.53120    0.00000    0.00000    0.00000 ;    C32-   O11-   C33-   C34
    69    179    177    174      3   30.33400    0.00000  -30.33400    0.00000    0.00000    0.00000 ;    C32-   C90-   C89-   C87
    69    179    177    178      3   30.33400    0.00000  -30.33400    0.00000    0.00000    0.00000 ;    C32-   C90-   C89-   H60
    69    179    180    181      3   30.33400    0.00000  -30.33400    0.00000    0.00000    0.00000 ;    C32-   C90-   C91-   H61
    69    179    180    182      3   30.33400    0.00000  -30.33400    0.00000    0.00000    0.00000 ;    C32-   C90-   C91-   C92
    70     69     71     72      3    1.60387    4.81160    0.00000   -6.41547    0.00000    0.00000 ;    H28-   C32-   O11-   C33
    70     69    179    177      3    0.00000    0.00000    0.00000    0.00000    0.00000    0.00000 ;    H28-   C32-   C90-   C89
    70     69    179    180      3    0.00000    0.00000    0.00000    0.00000    0.00000    0.00000 ;    H28-   C32-   C90-   C91
    71     69    179    177      3    0.00000    0.00000    0.00000    0.00000    0.00000    0.00000 ;    O11-   C32-   C90-   C89
    71     69    179    180      3    0.00000    0.00000    0.00000    0.00000    0.00000    0.00000 ;    O11-   C32-   C90-   C91
    71     72     73     74      3   30.33400    0.00000  -30.33400    0.00000    0.00000    0.00000 ;    O11-   C33-   C34-   H29
    71     72     73     75      3   30.33400    0.00000  -30.33400    0.00000    0.00000    0.00000 ;    O11-   C33-   C34-   C35
    72     71     69    179      3    1.60387    4.81160    0.00000   -6.41547    0.00000    0.00000 ;    C33-   O11-   C32-   C90
    72     73     75     76      3   30.33400    0.00000  -30.33400    0.00000    0.00000    0.00000 ;    C33-   C34-   C35-   O12
    73     75     76     77      3    7.53120    0.00000   -7.53120    0.00000    0.00000    0.00000 ;    C34-   C35-   O12-   C36
    74     73     75     76      3   30.33400    0.00000  -30.33400    0.00000    0.00000    0.00000 ;    H29-   C34-   C35-   O12
    75     76     77     78      3    1.60387    4.81160    0.00000   -6.41547    0.00000    0.00000 ;    C35-   O12-   C36-   H30
    75     76     77     79      3    1.60387    4.81160    0.00000   -6.41547    0.00000    0.00000 ;    C35-   O12-   C36-   O13
    75     76     77    153      3    1.60387    4.81160    0.00000   -6.41547    0.00000    0.00000 ;    C35-   O12-   C36-   C76
    76     77     79     80      3    1.60387    4.81160    0.00000   -6.41547    0.00000    0.00000 ;    O12-   C36-   O13-   C37
    76     77    153    151      3    0.00000    0.00000    0.00000    0.00000    0.00000    0.00000 ;    O12-   C36-   C76-   C75
    76     77    153    154      3    0.00000    0.00000    0.00000    0.00000    0.00000    0.00000 ;    O12-   C36-   C76-   C77
    77     79     80     81      3    7.53120    0.00000   -7.53120    0.00000    0.00000    0.00000 ;    C36-   O13-   C37-   C38
    77    153    151    148      3   30.33400    0.00000  -30.33400    0.00000    0.00000    0.00000 ;    C36-   C76-   C75-   C73
    77    153    151    152      3   30.33400    0.00000  -30.33400    0.00000    0.00000    0.00000 ;    C36-   C76-   C75-   H52
    77    153    154    155      3   30.33400    0.00000  -30.33400    0.00000    0.00000    0.00000 ;    C36-   C76-   C77-   H53
    77    153    154    156      3   30.33400    0.00000  -30.33400    0.00000    0.00000    0.00000 ;    C36-   C76-   C77-   C78
    78     77     79     80      3    1.60387    4.81160    0.00000   -6.41547    0.00000    0.00000 ;    H30-   C36-   O13-   C37
    78     77    153    151      3    0.00000    0.00000    0.00000    0.00000    0.00000    0.00000 ;    H30-   C36-   C76-   C75
    78     77    153    154      3    0.00000    0.00000    0.00000    0.00000    0.00000    0.00000 ;    H30-   C36-   C76-   C77
    79     77    153    151      3    0.00000    0.00000    0.00000    0.00000    0.00000    0.00000 ;    O13-   C36-   C76-   C75
    79     77    153    154      3    0.00000    0.00000    0.00000    0.00000    0.00000    0.00000 ;    O13-   C36-   C76-   C77
    79     80     81     82      3   30.33400    0.00000  -30.33400    0.00000    0.00000    0.00000 ;    O13-   C37-   C38-   H31
    79     80     81     83      3   30.33400    0.00000  -30.33400    0.00000    0.00000    0.00000 ;    O13-   C37-   C38-   C39
    80     79     77    153      3    1.60387    4.81160    0.00000   -6.41547    0.00000    0.00000 ;    C37-   O13-   C36-   C76
    80     81     83     84      3   30.33400    0.00000  -30.33400    0.00000    0.00000    0.00000 ;    C37-   C38-   C39-   O14
    81     83     84     85      3    7.53120    0.00000   -7.53120    0.00000    0.00000    0.00000 ;    C38-   C39-   O14-   C40
    82     81     83     84      3   30.33400    0.00000  -30.33400    0.00000    0.00000    0.00000 ;    H31-   C38-   C39-   O14
    83     84     85     86      3    1.60387    4.81160    0.00000   -6.41547    0.00000    0.00000 ;    C39-   O14-   C40-   H32
    83     84     85     87      3    1.60387    4.81160    0.00000   -6.41547    0.00000    0.00000 ;    C39-   O14-   C40-   O15
    83     84     85    127      3    1.60387    4.81160    0.00000   -6.41547    0.00000    0.00000 ;    C39-   O14-   C40-   C62
    84     85     87     88      3    1.60387    4.81160    0.00000   -6.41547    0.00000    0.00000 ;    O14-   C40-   O15-   C41
    84     85    127    125      3    0.00000    0.00000    0.00000    0.00000    0.00000    0.00000 ;    O14-   C40-   C62-   C61
    84     85    127    128      3    0.00000    0.00000    0.00000    0.00000    0.00000    0.00000 ;    O14-   C40-   C62-   C63
    85     87     88     89      3    7.53120    0.00000   -7.53120    0.00000    0.00000    0.00000 ;    C40-   O15-   C41-   C42
    85    127    125    122      3   30.33400    0.00000  -30.33400    0.00000    0.00000    0.00000 ;    C40-   C62-   C61-   C59
    85    127    125    126      3   30.33400    0.00000  -30.33400    0.00000    0.00000    0.00000 ;    C40-   C62-   C61-   H44
    85    127    128    129      3   30.33400    0.00000  -30.33400    0.00000    0.00000    0.00000 ;    C40-   C62-   C63-   H45
    85    127    128    130      3   30.33400    0.00000  -30.33400    0.00000    0.00000    0.00000 ;    C40-   C62-   C63-   C64
    86     85     87     88      3    1.60387    4.81160    0.00000   -6.41547    0.00000    0.00000 ;    H32-   C40-   O15-   C41
    86     85    127    125      3    0.00000    0.00000    0.00000    0.00000    0.00000    0.00000 ;    H32-   C40-   C62-   C61
    86     85    127    128      3    0.00000    0.00000    0.00000    0.00000    0.00000    0.00000 ;    H32-   C40-   C62-   C63
    87     85    127    125      3    0.00000    0.00000    0.00000    0.00000    0.00000    0.00000 ;    O15-   C40-   C62-   C61
    87     85    127    128      3    0.00000    0.00000    0.00000    0.00000    0.00000    0.00000 ;    O15-   C40-   C62-   C63
    87     88     89     90      3   30.33400    0.00000  -30.33400    0.00000    0.00000    0.00000 ;    O15-   C41-   C42-   H33
    87     88     89     91      3   30.33400    0.00000  -30.33400    0.00000    0.00000    0.00000 ;    O15-   C41-   C42-   C43
    88     87     85    127      3    1.60387    4.81160    0.00000   -6.41547    0.00000    0.00000 ;    C41-   O15-   C40-   C62
    88     89     91     92      3   30.33400    0.00000  -30.33400    0.00000    0.00000    0.00000 ;    C41-   C42-   C43-   O16
    89     91     92     93      3    7.53120    0.00000   -7.53120    0.00000    0.00000    0.00000 ;    C42-   C43-   O16-   C44
    90     89     91     92      3   30.33400    0.00000  -30.33400    0.00000    0.00000    0.00000 ;    H33-   C42-   C43-   O16
    91     92     93     94      3    1.60387    4.81160    0.00000   -6.41547    0.00000    0.00000 ;    C43-   O16-   C44-   H34
    91     92     93     95      3    1.60387    4.81160    0.00000   -6.41547    0.00000    0.00000 ;    C43-   O16-   C44-   C45
    92     93     95     96      3    0.00000    0.00000    0.00000    0.00000    0.00000    0.00000 ;    O16-   C44-   C45-   C46
    92     93     95     98      3    0.00000    0.00000    0.00000    0.00000    0.00000    0.00000 ;    O16-   C44-   C45-   C47
    93     95     96     97      3   30.33400    0.00000  -30.33400    0.00000    0.00000    0.00000 ;    C44-   C45-   C46-   H35
    93     95     96    104      3   30.33400    0.00000  -30.33400    0.00000    0.00000    0.00000 ;    C44-   C45-   C46-   C50
    93     95     98     99      3   30.33400    0.00000  -30.33400    0.00000    0.00000    0.00000 ;    C44-   C45-   C47-   H36
    93     95     98    100      3   30.33400    0.00000  -30.33400    0.00000    0.00000    0.00000 ;    C44-   C45-   C47-   C48
    94     93     95     96      3    0.00000    0.00000    0.00000    0.00000    0.00000    0.00000 ;    H34-   C44-   C45-   C46
    94     93     95     98      3    0.00000    0.00000    0.00000    0.00000    0.00000    0.00000 ;    H34-   C44-   C45-   C47
    95     96    104    102      3   30.33400    0.00000  -30.33400    0.00000    0.00000    0.00000 ;    C45-   C46-   C50-   C49
    95     96    104    105      3   30.33400    0.00000  -30.33400    0.00000    0.00000    0.00000 ;    C45-   C46-   C50-   O18
    95     98    100    101      3   30.33400    0.00000  -30.33400    0.00000    0.00000    0.00000 ;    C45-   C47-   C48-   O17
    95     98    100    102      3   30.33400    0.00000  -30.33400    0.00000    0.00000    0.00000 ;    C45-   C47-   C48-   C49
    96     95     98     99      3   30.33400    0.00000  -30.33400    0.00000    0.00000    0.00000 ;    C46-   C45-   C47-   H36
    96     95     98    100      3   30.33400    0.00000  -30.33400    0.00000    0.00000    0.00000 ;    C46-   C45-   C47-   C48
    96    104    102    100      3   30.33400    0.00000  -30.33400    0.00000    0.00000    0.00000 ;    C46-   C50-   C49-   C48
    96    104    102    103      3   30.33400    0.00000  -30.33400    0.00000    0.00000    0.00000 ;    C46-   C50-   C49-   H37
    96    104    105    106      3    7.53120    0.00000   -7.53120    0.00000    0.00000    0.00000 ;    C46-   C50-   O18-   C51
    97     96     95     98      3   30.33400    0.00000  -30.33400    0.00000    0.00000    0.00000 ;    H35-   C46-   C45-   C47
    97     96    104    102      3   30.33400    0.00000  -30.33400    0.00000    0.00000    0.00000 ;    H35-   C46-   C50-   C49
    97     96    104    105      3   30.33400    0.00000  -30.33400    0.00000    0.00000    0.00000 ;    H35-   C46-   C50-   O18
    98     95     96    104      3   30.33400    0.00000  -30.33400    0.00000    0.00000    0.00000 ;    C47-   C45-   C46-   C50
    98    100    101    192      3    7.53120    0.00000   -7.53120    0.00000    0.00000    0.00000 ;    C47-   C48-   O17-   C97
    98    100    102    103      3   30.33400    0.00000  -30.33400    0.00000    0.00000    0.00000 ;    C47-   C48-   C49-   H37
    98    100    102    104      3   30.33400    0.00000  -30.33400    0.00000    0.00000    0.00000 ;    C47-   C48-   C49-   C50
    99     98    100    101      3   30.33400    0.00000  -30.33400    0.00000    0.00000    0.00000 ;    H36-   C47-   C48-   O17
    99     98    100    102      3   30.33400    0.00000  -30.33400    0.00000    0.00000    0.00000 ;    H36-   C47-   C48-   C49
   100    101    192    187      3    7.53120    0.00000   -7.53120    0.00000    0.00000    0.00000 ;    C48-   O17-   C97-   C95
   100    101    192    193      3    7.53120    0.00000   -7.53120    0.00000    0.00000    0.00000 ;    C48-   O17-   C97-   C98
   100    102    104    105      3   30.33400    0.00000  -30.33400    0.00000    0.00000    0.00000 ;    C48-   C49-   C50-   O18
   101    100    102    103      3   30.33400    0.00000  -30.33400    0.00000    0.00000    0.00000 ;    O17-   C48-   C49-   H37
   101    100    102    104      3   30.33400    0.00000  -30.33400    0.00000    0.00000    0.00000 ;    O17-   C48-   C49-   C50
   101    192    187    184      3   30.33400    0.00000  -30.33400    0.00000    0.00000    0.00000 ;    O17-   C97-   C95-   C93
   101    192    187    188      3   30.33400    0.00000  -30.33400    0.00000    0.00000    0.00000 ;    O17-   C97-   C95-   C96
   101    192    193    194      3   30.33400    0.00000  -30.33400    0.00000    0.00000    0.00000 ;    O17-   C97-   C98-   H66
   101    192    193    195      3   30.33400    0.00000  -30.33400    0.00000    0.00000    0.00000 ;    O17-   C97-   C98-   C99
   102    100    101    192      3    7.53120    0.00000   -7.53120    0.00000    0.00000    0.00000 ;    C49-   C48-   O17-   C97
   102    104    105    106      3    7.53120    0.00000   -7.53120    0.00000    0.00000    0.00000 ;    C49-   C50-   O18-   C51
   103    102    104    105      3   30.33400    0.00000  -30.33400    0.00000    0.00000    0.00000 ;    H37-   C49-   C50-   O18
   104    105    106    107      3    7.53120    0.00000   -7.53120    0.00000    0.00000    0.00000 ;    C50-   O18-   C51-   C52
   104    105    106    115      3    7.53120    0.00000   -7.53120    0.00000    0.00000    0.00000 ;    C50-   O18-   C51-   C56
   105    106    107    108      3   30.33400    0.00000  -30.33400    0.00000    0.00000    0.00000 ;    O18-   C51-   C52-   C53
   105    106    107    114      3   30.33400    0.00000  -30.33400    0.00000    0.00000    0.00000 ;    O18-   C51-   C52-   H39
   105    106    115    116      3   30.33400    0.00000  -30.33400    0.00000    0.00000    0.00000 ;    O18-   C51-   C56-   C57
   105    106    115    120      3   30.33400    0.00000  -30.33400    0.00000    0.00000    0.00000 ;    O18-   C51-   C56-   C58
   106    107    108    109      3   30.33400    0.00000  -30.33400    0.00000    0.00000    0.00000 ;    C51-   C52-   C53-   C54
   106    107    108    111      3   30.33400    0.00000  -30.33400    0.00000    0.00000    0.00000 ;    C51-   C52-   C53-   C55
   106    115    116    117      3    0.00000    0.00000    0.00000    0.00000    0.00000    0.00000 ;    C51-   C56-   C57-   H40
   106    115    116    118      3    0.00000    0.00000    0.00000    0.00000    0.00000    0.00000 ;    C51-   C56-   C57-   H41
   106    115    116    119      3    0.00000    0.00000    0.00000    0.00000    0.00000    0.00000 ;    C51-   C56-   C57-   H42
   106    115    120    109      3   30.33400    0.00000  -30.33400    0.00000    0.00000    0.00000 ;    C51-   C56-   C58-   C54
   106    115    120    121      3   30.33400    0.00000  -30.33400    0.00000    0.00000    0.00000 ;    C51-   C56-   C58-   O21
   107    106    115    116      3   30.33400    0.00000  -30.33400    0.00000    0.00000    0.00000 ;    C52-   C51-   C56-   C57
   107    106    115    120      3   30.33400    0.00000  -30.33400    0.00000    0.00000    0.00000 ;    C52-   C51-   C56-   C58
   107    108    109    110      3   30.33400    0.00000  -30.33400    0.00000    0.00000    0.00000 ;    C52-   C53-   C54-   H38
   107    108    109    120      3   30.33400    0.00000  -30.33400    0.00000    0.00000    0.00000 ;    C52-   C53-   C54-   C58
   107    108    111    112      3    8.36800    0.00000   -8.36800    0.00000    0.00000    0.00000 ;    C52-   C53-   C55-   O19
   107    108    111    113      3    8.36800    0.00000   -8.36800    0.00000    0.00000    0.00000 ;    C52-   C53-   C55-   O20
   108    107    106    115      3   30.33400    0.00000  -30.33400    0.00000    0.00000    0.00000 ;    C53-   C52-   C51-   C56
   108    109    120    115      3   30.33400    0.00000  -30.33400    0.00000    0.00000    0.00000 ;    C53-   C54-   C58-   C56
   108    109    120    121      3   30.33400    0.00000  -30.33400    0.00000    0.00000    0.00000 ;    C53-   C54-   C58-   O21
   109    108    107    114      3   30.33400    0.00000  -30.33400    0.00000    0.00000    0.00000 ;    C54-   C53-   C52-   H39
   109    108    111    112      3    8.36800    0.00000   -8.36800    0.00000    0.00000    0.00000 ;    C54-   C53-   C55-   O19
   109    108    111    113      3    8.36800    0.00000   -8.36800    0.00000    0.00000    0.00000 ;    C54-   C53-   C55-   O20
   109    120    115    116      3   30.33400    0.00000  -30.33400    0.00000    0.00000    0.00000 ;    C54-   C58-   C56-   C57
   109    120    121    122      3    7.53120    0.00000   -7.53120    0.00000    0.00000    0.00000 ;    C54-   C58-   O21-   C59
   110    109    108    111      3   30.33400    0.00000  -30.33400    0.00000    0.00000    0.00000 ;    H38-   C54-   C53-   C55
   110    109    120    115      3   30.33400    0.00000  -30.33400    0.00000    0.00000    0.00000 ;    H38-   C54-   C58-   C56
   110    109    120    121      3   30.33400    0.00000  -30.33400    0.00000    0.00000    0.00000 ;    H38-   C54-   C58-   O21
   111    108    107    114      3   30.33400    0.00000  -30.33400    0.00000    0.00000    0.00000 ;    C55-   C53-   C52-   H39
   111    108    109    120      3   30.33400    0.00000  -30.33400    0.00000    0.00000    0.00000 ;    C55-   C53-   C54-   C58
   114    107    106    115      3   30.33400    0.00000  -30.33400    0.00000    0.00000    0.00000 ;    H39-   C52-   C51-   C56
   115    120    121    122      3    7.53120    0.00000   -7.53120    0.00000    0.00000    0.00000 ;    C56-   C58-   O21-   C59
   116    115    120    121      3   30.33400    0.00000  -30.33400    0.00000    0.00000    0.00000 ;    C57-   C56-   C58-   O21
   117    116    115    120      3    0.00000    0.00000    0.00000    0.00000    0.00000    0.00000 ;    H40-   C57-   C56-   C58
   118    116    115    120      3    0.00000    0.00000    0.00000    0.00000    0.00000    0.00000 ;    H41-   C57-   C56-   C58
   119    116    115    120      3    0.00000    0.00000    0.00000    0.00000    0.00000    0.00000 ;    H42-   C57-   C56-   C58
   120    121    122    123      3    7.53120    0.00000   -7.53120    0.00000    0.00000    0.00000 ;    C58-   O21-   C59-   C60
   120    121    122    125      3    7.53120    0.00000   -7.53120    0.00000    0.00000    0.00000 ;    C58-   O21-   C59-   C61
   121    122    123    124      3   30.33400    0.00000  -30.33400    0.00000    0.00000    0.00000 ;    O21-   C59-   C60-   H43
   121    122    123    130      3   30.33400    0.00000  -30.33400    0.00000    0.00000    0.00000 ;    O21-   C59-   C60-   C64
   121    122    125    126      3   30.33400    0.00000  -30.33400    0.00000    0.00000    0.00000 ;    O21-   C59-   C61-   H44
   121    122    125    127      3   30.33400    0.00000  -30.33400    0.00000    0.00000    0.00000 ;    O21-   C59-   C61-   C62
   122    123    130    128      3   30.33400    0.00000  -30.33400    0.00000    0.00000    0.00000 ;    C59-   C60-   C64-   C63
   122    123    130    131      3   30.33400    0.00000  -30.33400    0.00000    0.00000    0.00000 ;    C59-   C60-   C64-   O22
   122    125    127    128      3   30.33400    0.00000  -30.33400    0.00000    0.00000    0.00000 ;    C59-   C61-   C62-   C63
   123    122    125    126      3   30.33400    0.00000  -30.33400    0.00000    0.00000    0.00000 ;    C60-   C59-   C61-   H44
   123    122    125    127      3   30.33400    0.00000  -30.33400    0.00000    0.00000    0.00000 ;    C60-   C59-   C61-   C62
   123    130    128    127      3   30.33400    0.00000  -30.33400    0.00000    0.00000    0.00000 ;    C60-   C64-   C63-   C62
   123    130    128    129      3   30.33400    0.00000  -30.33400    0.00000    0.00000    0.00000 ;    C60-   C64-   C63-   H45
   123    130    131    132      3    7.53120    0.00000   -7.53120    0.00000    0.00000    0.00000 ;    C60-   C64-   O22-   C65
   124    123    122    125      3   30.33400    0.00000  -30.33400    0.00000    0.00000    0.00000 ;    H43-   C60-   C59-   C61
   124    123    130    128      3   30.33400    0.00000  -30.33400    0.00000    0.00000    0.00000 ;    H43-   C60-   C64-   C63
   124    123    130    131      3   30.33400    0.00000  -30.33400    0.00000    0.00000    0.00000 ;    H43-   C60-   C64-   O22
   125    122    123    130      3   30.33400    0.00000  -30.33400    0.00000    0.00000    0.00000 ;    C61-   C59-   C60-   C64
   125    127    128    129      3   30.33400    0.00000  -30.33400    0.00000    0.00000    0.00000 ;    C61-   C62-   C63-   H45
   125    127    128    130      3   30.33400    0.00000  -30.33400    0.00000    0.00000    0.00000 ;    C61-   C62-   C63-   C64
   126    125    127    128      3   30.33400    0.00000  -30.33400    0.00000    0.00000    0.00000 ;    H44-   C61-   C62-   C63
   127    128    130    131      3   30.33400    0.00000  -30.33400    0.00000    0.00000    0.00000 ;    C62-   C63-   C64-   O22
   128    130    131    132      3    7.53120    0.00000   -7.53120    0.00000    0.00000    0.00000 ;    C63-   C64-   O22-   C65
   129    128    130    131      3   30.33400    0.00000  -30.33400    0.00000    0.00000    0.00000 ;    H45-   C63-   C64-   O22
   130    131    132    133      3    7.53120    0.00000   -7.53120    0.00000    0.00000    0.00000 ;    C64-   O22-   C65-   C66
   130    131    132    141      3    7.53120    0.00000   -7.53120    0.00000    0.00000    0.00000 ;    C64-   O22-   C65-   C70
   131    132    133    134      3   30.33400    0.00000  -30.33400    0.00000    0.00000    0.00000 ;    O22-   C65-   C66-   C67
   131    132    133    140      3   30.33400    0.00000  -30.33400    0.00000    0.00000    0.00000 ;    O22-   C65-   C66-   H47
   131    132    141    142      3   30.33400    0.00000  -30.33400    0.00000    0.00000    0.00000 ;    O22-   C65-   C70-   C71
   131    132    141    146      3   30.33400    0.00000  -30.33400    0.00000    0.00000    0.00000 ;    O22-   C65-   C70-   C72
   132    133    134    135      3   30.33400    0.00000  -30.33400    0.00000    0.00000    0.00000 ;    C65-   C66-   C67-   C68
   132    133    134    137      3   30.33400    0.00000  -30.33400    0.00000    0.00000    0.00000 ;    C65-   C66-   C67-   C69
   132    141    142    143      3    0.00000    0.00000    0.00000    0.00000    0.00000    0.00000 ;    C65-   C70-   C71-   H48
   132    141    142    144      3    0.00000    0.00000    0.00000    0.00000    0.00000    0.00000 ;    C65-   C70-   C71-   H49
   132    141    142    145      3    0.00000    0.00000    0.00000    0.00000    0.00000    0.00000 ;    C65-   C70-   C71-   H50
   132    141    146    135      3   30.33400    0.00000  -30.33400    0.00000    0.00000    0.00000 ;    C65-   C70-   C72-   C68
   132    141    146    147      3   30.33400    0.00000  -30.33400    0.00000    0.00000    0.00000 ;    C65-   C70-   C72-   O25
   133    132    141    142      3   30.33400    0.00000  -30.33400    0.00000    0.00000    0.00000 ;    C66-   C65-   C70-   C71
   133    132    141    146      3   30.33400    0.00000  -30.33400    0.00000    0.00000    0.00000 ;    C66-   C65-   C70-   C72
   133    134    135    136      3   30.33400    0.00000  -30.33400    0.00000    0.00000    0.00000 ;    C66-   C67-   C68-   H46
   133    134    135    146      3   30.33400    0.00000  -30.33400    0.00000    0.00000    0.00000 ;    C66-   C67-   C68-   C72
   133    134    137    138      3    8.36800    0.00000   -8.36800    0.00000    0.00000    0.00000 ;    C66-   C67-   C69-   O23
   133    134    137    139      3    8.36800    0.00000   -8.36800    0.00000    0.00000    0.00000 ;    C66-   C67-   C69-   O24
   134    133    132    141      3   30.33400    0.00000  -30.33400    0.00000    0.00000    0.00000 ;    C67-   C66-   C65-   C70
   134    135    146    141      3   30.33400    0.00000  -30.33400    0.00000    0.00000    0.00000 ;    C67-   C68-   C72-   C70
   134    135    146    147      3   30.33400    0.00000  -30.33400    0.00000    0.00000    0.00000 ;    C67-   C68-   C72-   O25
   135    134    133    140      3   30.33400    0.00000  -30.33400    0.00000    0.00000    0.00000 ;    C68-   C67-   C66-   H47
   135    134    137    138      3    8.36800    0.00000   -8.36800    0.00000    0.00000    0.00000 ;    C68-   C67-   C69-   O23
   135    134    137    139      3    8.36800    0.00000   -8.36800    0.00000    0.00000    0.00000 ;    C68-   C67-   C69-   O24
   135    146    141    142      3   30.33400    0.00000  -30.33400    0.00000    0.00000    0.00000 ;    C68-   C72-   C70-   C71
   135    146    147    148      3    7.53120    0.00000   -7.53120    0.00000    0.00000    0.00000 ;    C68-   C72-   O25-   C73
   136    135    134    137      3   30.33400    0.00000  -30.33400    0.00000    0.00000    0.00000 ;    H46-   C68-   C67-   C69
   136    135    146    141      3   30.33400    0.00000  -30.33400    0.00000    0.00000    0.00000 ;    H46-   C68-   C72-   C70
   136    135    146    147      3   30.33400    0.00000  -30.33400    0.00000    0.00000    0.00000 ;    H46-   C68-   C72-   O25
   137    134    133    140      3   30.33400    0.00000  -30.33400    0.00000    0.00000    0.00000 ;    C69-   C67-   C66-   H47
   137    134    135    146      3   30.33400    0.00000  -30.33400    0.00000    0.00000    0.00000 ;    C69-   C67-   C68-   C72
   140    133    132    141      3   30.33400    0.00000  -30.33400    0.00000    0.00000    0.00000 ;    H47-   C66-   C65-   C70
   141    146    147    148      3    7.53120    0.00000   -7.53120    0.00000    0.00000    0.00000 ;    C70-   C72-   O25-   C73
   142    141    146    147      3   30.33400    0.00000  -30.33400    0.00000    0.00000    0.00000 ;    C71-   C70-   C72-   O25
   143    142    141    146      3    0.00000    0.00000    0.00000    0.00000    0.00000    0.00000 ;    H48-   C71-   C70-   C72
   144    142    141    146      3    0.00000    0.00000    0.00000    0.00000    0.00000    0.00000 ;    H49-   C71-   C70-   C72
   145    142    141    146      3    0.00000    0.00000    0.00000    0.00000    0.00000    0.00000 ;    H50-   C71-   C70-   C72
   146    147    148    149      3    7.53120    0.00000   -7.53120    0.00000    0.00000    0.00000 ;    C72-   O25-   C73-   C74
   146    147    148    151      3    7.53120    0.00000   -7.53120    0.00000    0.00000    0.00000 ;    C72-   O25-   C73-   C75
   147    148    149    150      3   30.33400    0.00000  -30.33400    0.00000    0.00000    0.00000 ;    O25-   C73-   C74-   H51
   147    148    149    156      3   30.33400    0.00000  -30.33400    0.00000    0.00000    0.00000 ;    O25-   C73-   C74-   C78
   147    148    151    152      3   30.33400    0.00000  -30.33400    0.00000    0.00000    0.00000 ;    O25-   C73-   C75-   H52
   147    148    151    153      3   30.33400    0.00000  -30.33400    0.00000    0.00000    0.00000 ;    O25-   C73-   C75-   C76
   148    149    156    154      3   30.33400    0.00000  -30.33400    0.00000    0.00000    0.00000 ;    C73-   C74-   C78-   C77
   148    149    156    157      3   30.33400    0.00000  -30.33400    0.00000    0.00000    0.00000 ;    C73-   C74-   C78-   O26
   148    151    153    154      3   30.33400    0.00000  -30.33400    0.00000    0.00000    0.00000 ;    C73-   C75-   C76-   C77
   149    148    151    152      3   30.33400    0.00000  -30.33400    0.00000    0.00000    0.00000 ;    C74-   C73-   C75-   H52
   149    148    151    153      3   30.33400    0.00000  -30.33400    0.00000    0.00000    0.00000 ;    C74-   C73-   C75-   C76
   149    156    154    153      3   30.33400    0.00000  -30.33400    0.00000    0.00000    0.00000 ;    C74-   C78-   C77-   C76
   149    156    154    155      3   30.33400    0.00000  -30.33400    0.00000    0.00000    0.00000 ;    C74-   C78-   C77-   H53
   149    156    157    158      3    7.53120    0.00000   -7.53120    0.00000    0.00000    0.00000 ;    C74-   C78-   O26-   C79
   150    149    148    151      3   30.33400    0.00000  -30.33400    0.00000    0.00000    0.00000 ;    H51-   C74-   C73-   C75
   150    149    156    154      3   30.33400    0.00000  -30.33400    0.00000    0.00000    0.00000 ;    H51-   C74-   C78-   C77
   150    149    156    157      3   30.33400    0.00000  -30.33400    0.00000    0.00000    0.00000 ;    H51-   C74-   C78-   O26
   151    148    149    156      3   30.33400    0.00000  -30.33400    0.00000    0.00000    0.00000 ;    C75-   C73-   C74-   C78
   151    153    154    155      3   30.33400    0.00000  -30.33400    0.00000    0.00000    0.00000 ;    C75-   C76-   C77-   H53
   151    153    154    156      3   30.33400    0.00000  -30.33400    0.00000    0.00000    0.00000 ;    C75-   C76-   C77-   C78
   152    151    153    154      3   30.33400    0.00000  -30.33400    0.00000    0.00000    0.00000 ;    H52-   C75-   C76-   C77
   153    154    156    157      3   30.33400    0.00000  -30.33400    0.00000    0.00000    0.00000 ;    C76-   C77-   C78-   O26
   154    156    157    158      3    7.53120    0.00000   -7.53120    0.00000    0.00000    0.00000 ;    C77-   C78-   O26-   C79
   155    154    156    157      3   30.33400    0.00000  -30.33400    0.00000    0.00000    0.00000 ;    H53-   C77-   C78-   O26
   156    157    158    159      3    7.53120    0.00000   -7.53120    0.00000    0.00000    0.00000 ;    C78-   O26-   C79-   C80
   156    157    158    167      3    7.53120    0.00000   -7.53120    0.00000    0.00000    0.00000 ;    C78-   O26-   C79-   C84
   157    158    159    160      3   30.33400    0.00000  -30.33400    0.00000    0.00000    0.00000 ;    O26-   C79-   C80-   C81
   157    158    159    166      3   30.33400    0.00000  -30.33400    0.00000    0.00000    0.00000 ;    O26-   C79-   C80-   H55
   157    158    167    168      3   30.33400    0.00000  -30.33400    0.00000    0.00000    0.00000 ;    O26-   C79-   C84-   C85
   157    158    167    172      3   30.33400    0.00000  -30.33400    0.00000    0.00000    0.00000 ;    O26-   C79-   C84-   C86
   158    159    160    161      3   30.33400    0.00000  -30.33400    0.00000    0.00000    0.00000 ;    C79-   C80-   C81-   C82
   158    159    160    163      3   30.33400    0.00000  -30.33400    0.00000    0.00000    0.00000 ;    C79-   C80-   C81-   C83
   158    167    168    169      3    0.00000    0.00000    0.00000    0.00000    0.00000    0.00000 ;    C79-   C84-   C85-   H56
   158    167    168    170      3    0.00000    0.00000    0.00000    0.00000    0.00000    0.00000 ;    C79-   C84-   C85-   H57
   158    167    168    171      3    0.00000    0.00000    0.00000    0.00000    0.00000    0.00000 ;    C79-   C84-   C85-   H58
   158    167    172    161      3   30.33400    0.00000  -30.33400    0.00000    0.00000    0.00000 ;    C79-   C84-   C86-   C82
   158    167    172    173      3   30.33400    0.00000  -30.33400    0.00000    0.00000    0.00000 ;    C79-   C84-   C86-   O29
   159    158    167    168      3   30.33400    0.00000  -30.33400    0.00000    0.00000    0.00000 ;    C80-   C79-   C84-   C85
   159    158    167    172      3   30.33400    0.00000  -30.33400    0.00000    0.00000    0.00000 ;    C80-   C79-   C84-   C86
   159    160    161    162      3   30.33400    0.00000  -30.33400    0.00000    0.00000    0.00000 ;    C80-   C81-   C82-   H54
   159    160    161    172      3   30.33400    0.00000  -30.33400    0.00000    0.00000    0.00000 ;    C80-   C81-   C82-   C86
   159    160    163    164      3    8.36800    0.00000   -8.36800    0.00000    0.00000    0.00000 ;    C80-   C81-   C83-   O27
   159    160    163    165      3    8.36800    0.00000   -8.36800    0.00000    0.00000    0.00000 ;    C80-   C81-   C83-   O28
   160    159    158    167      3   30.33400    0.00000  -30.33400    0.00000    0.00000    0.00000 ;    C81-   C80-   C79-   C84
   160    161    172    167      3   30.33400    0.00000  -30.33400    0.00000    0.00000    0.00000 ;    C81-   C82-   C86-   C84
   160    161    172    173      3   30.33400    0.00000  -30.33400    0.00000    0.00000    0.00000 ;    C81-   C82-   C86-   O29
   161    160    159    166      3   30.33400    0.00000  -30.33400    0.00000    0.00000    0.00000 ;    C82-   C81-   C80-   H55
   161    160    163    164      3    8.36800    0.00000   -8.36800    0.00000    0.00000    0.00000 ;    C82-   C81-   C83-   O27
   161    160    163    165      3    8.36800    0.00000   -8.36800    0.00000    0.00000    0.00000 ;    C82-   C81-   C83-   O28
   161    172    167    168      3   30.33400    0.00000  -30.33400    0.00000    0.00000    0.00000 ;    C82-   C86-   C84-   C85
   161    172    173    174      3    7.53120    0.00000   -7.53120    0.00000    0.00000    0.00000 ;    C82-   C86-   O29-   C87
   162    161    160    163      3   30.33400    0.00000  -30.33400    0.00000    0.00000    0.00000 ;    H54-   C82-   C81-   C83
   162    161    172    167      3   30.33400    0.00000  -30.33400    0.00000    0.00000    0.00000 ;    H54-   C82-   C86-   C84
   162    161    172    173      3   30.33400    0.00000  -30.33400    0.00000    0.00000    0.00000 ;    H54-   C82-   C86-   O29
   163    160    159    166      3   30.33400    0.00000  -30.33400    0.00000    0.00000    0.00000 ;    C83-   C81-   C80-   H55
   163    160    161    172      3   30.33400    0.00000  -30.33400    0.00000    0.00000    0.00000 ;    C83-   C81-   C82-   C86
   166    159    158    167      3   30.33400    0.00000  -30.33400    0.00000    0.00000    0.00000 ;    H55-   C80-   C79-   C84
   167    172    173    174      3    7.53120    0.00000   -7.53120    0.00000    0.00000    0.00000 ;    C84-   C86-   O29-   C87
   168    167    172    173      3   30.33400    0.00000  -30.33400    0.00000    0.00000    0.00000 ;    C85-   C84-   C86-   O29
   169    168    167    172      3    0.00000    0.00000    0.00000    0.00000    0.00000    0.00000 ;    H56-   C85-   C84-   C86
   170    168    167    172      3    0.00000    0.00000    0.00000    0.00000    0.00000    0.00000 ;    H57-   C85-   C84-   C86
   171    168    167    172      3    0.00000    0.00000    0.00000    0.00000    0.00000    0.00000 ;    H58-   C85-   C84-   C86
   172    173    174    175      3    7.53120    0.00000   -7.53120    0.00000    0.00000    0.00000 ;    C86-   O29-   C87-   C88
   172    173    174    177      3    7.53120    0.00000   -7.53120    0.00000    0.00000    0.00000 ;    C86-   O29-   C87-   C89
   173    174    175    176      3   30.33400    0.00000  -30.33400    0.00000    0.00000    0.00000 ;    O29-   C87-   C88-   H59
   173    174    175    182      3   30.33400    0.00000  -30.33400    0.00000    0.00000    0.00000 ;    O29-   C87-   C88-   C92
   173    174    177    178      3   30.33400    0.00000  -30.33400    0.00000    0.00000    0.00000 ;    O29-   C87-   C89-   H60
   173    174    177    179      3   30.33400    0.00000  -30.33400    0.00000    0.00000    0.00000 ;    O29-   C87-   C89-   C90
   174    175    182    180      3   30.33400    0.00000  -30.33400    0.00000    0.00000    0.00000 ;    C87-   C88-   C92-   C91
   174    175    182    183      3   30.33400    0.00000  -30.33400    0.00000    0.00000    0.00000 ;    C87-   C88-   C92-   O30
   174    177    179    180      3   30.33400    0.00000  -30.33400    0.00000    0.00000    0.00000 ;    C87-   C89-   C90-   C91
   175    174    177    178      3   30.33400    0.00000  -30.33400    0.00000    0.00000    0.00000 ;    C88-   C87-   C89-   H60
   175    174    177    179      3   30.33400    0.00000  -30.33400    0.00000    0.00000    0.00000 ;    C88-   C87-   C89-   C90
   175    182    180    179      3   30.33400    0.00000  -30.33400    0.00000    0.00000    0.00000 ;    C88-   C92-   C91-   C90
   175    182    180    181      3   30.33400    0.00000  -30.33400    0.00000    0.00000    0.00000 ;    C88-   C92-   C91-   H61
   175    182    183    184      3    7.53120    0.00000   -7.53120    0.00000    0.00000    0.00000 ;    C88-   C92-   O30-   C93
   176    175    174    177      3   30.33400    0.00000  -30.33400    0.00000    0.00000    0.00000 ;    H59-   C88-   C87-   C89
   176    175    182    180      3   30.33400    0.00000  -30.33400    0.00000    0.00000    0.00000 ;    H59-   C88-   C92-   C91
   176    175    182    183      3   30.33400    0.00000  -30.33400    0.00000    0.00000    0.00000 ;    H59-   C88-   C92-   O30
   177    174    175    182      3   30.33400    0.00000  -30.33400    0.00000    0.00000    0.00000 ;    C89-   C87-   C88-   C92
   177    179    180    181      3   30.33400    0.00000  -30.33400    0.00000    0.00000    0.00000 ;    C89-   C90-   C91-   H61
   177    179    180    182      3   30.33400    0.00000  -30.33400    0.00000    0.00000    0.00000 ;    C89-   C90-   C91-   C92
   178    177    179    180      3   30.33400    0.00000  -30.33400    0.00000    0.00000    0.00000 ;    H60-   C89-   C90-   C91
   179    180    182    183      3   30.33400    0.00000  -30.33400    0.00000    0.00000    0.00000 ;    C90-   C91-   C92-   O30
   180    182    183    184      3    7.53120    0.00000   -7.53120    0.00000    0.00000    0.00000 ;    C91-   C92-   O30-   C93
   181    180    182    183      3   30.33400    0.00000  -30.33400    0.00000    0.00000    0.00000 ;    H61-   C91-   C92-   O30
   182    183    184    185      3    7.53120    0.00000   -7.53120    0.00000    0.00000    0.00000 ;    C92-   O30-   C93-   C94
   182    183    184    187      3    7.53120    0.00000   -7.53120    0.00000    0.00000    0.00000 ;    C92-   O30-   C93-   C95
   183    184    185    186      3   30.33400    0.00000  -30.33400    0.00000    0.00000    0.00000 ;    O30-   C93-   C94-   H62
   183    184    185    195      3   30.33400    0.00000  -30.33400    0.00000    0.00000    0.00000 ;    O30-   C93-   C94-   C99
   183    184    187    188      3   30.33400    0.00000  -30.33400    0.00000    0.00000    0.00000 ;    O30-   C93-   C95-   C96
   183    184    187    192      3   30.33400    0.00000  -30.33400    0.00000    0.00000    0.00000 ;    O30-   C93-   C95-   C97
   184    185    195    193      3   30.33400    0.00000  -30.33400    0.00000    0.00000    0.00000 ;    C93-   C94-   C99-   C98
   184    185    195    196      3   30.33400    0.00000  -30.33400    0.00000    0.00000    0.00000 ;    C93-   C94-   C99-  C100
   184    187    188    189      3    0.00000    0.00000    0.00000    0.00000    0.00000    0.00000 ;    C93-   C95-   C96-   H63
   184    187    188    190      3    0.00000    0.00000    0.00000    0.00000    0.00000    0.00000 ;    C93-   C95-   C96-   H64
   184    187    188    191      3    0.00000    0.00000    0.00000    0.00000    0.00000    0.00000 ;    C93-   C95-   C96-   H65
   184    187    192    193      3   30.33400    0.00000  -30.33400    0.00000    0.00000    0.00000 ;    C93-   C95-   C97-   C98
   185    184    187    188      3   30.33400    0.00000  -30.33400    0.00000    0.00000    0.00000 ;    C94-   C93-   C95-   C96
   185    184    187    192      3   30.33400    0.00000  -30.33400    0.00000    0.00000    0.00000 ;    C94-   C93-   C95-   C97
   185    195    193    192      3   30.33400    0.00000  -30.33400    0.00000    0.00000    0.00000 ;    C94-   C99-   C98-   C97
   185    195    193    194      3   30.33400    0.00000  -30.33400    0.00000    0.00000    0.00000 ;    C94-   C99-   C98-   H66
   185    195    196    197      3    8.36800    0.00000   -8.36800    0.00000    0.00000    0.00000 ;    C94-   C99-  C100-   O31
   185    195    196    198      3    8.36800    0.00000   -8.36800    0.00000    0.00000    0.00000 ;    C94-   C99-  C100-   O32
   186    185    184    187      3   30.33400    0.00000  -30.33400    0.00000    0.00000    0.00000 ;    H62-   C94-   C93-   C95
   186    185    195    193      3   30.33400    0.00000  -30.33400    0.00000    0.00000    0.00000 ;    H62-   C94-   C99-   C98
   186    185    195    196      3   30.33400    0.00000  -30.33400    0.00000    0.00000    0.00000 ;    H62-   C94-   C99-  C100
   187    184    185    195      3   30.33400    0.00000  -30.33400    0.00000    0.00000    0.00000 ;    C95-   C93-   C94-   C99
   187    192    193    194      3   30.33400    0.00000  -30.33400    0.00000    0.00000    0.00000 ;    C95-   C97-   C98-   H66
   187    192    193    195      3   30.33400    0.00000  -30.33400    0.00000    0.00000    0.00000 ;    C95-   C97-   C98-   C99
   188    187    192    193      3   30.33400    0.00000  -30.33400    0.00000    0.00000    0.00000 ;    C96-   C95-   C97-   C98
   189    188    187    192      3    0.00000    0.00000    0.00000    0.00000    0.00000    0.00000 ;    H63-   C96-   C95-   C97
   190    188    187    192      3    0.00000    0.00000    0.00000    0.00000    0.00000    0.00000 ;    H64-   C96-   C95-   C97
   191    188    187    192      3    0.00000    0.00000    0.00000    0.00000    0.00000    0.00000 ;    H65-   C96-   C95-   C97
   192    193    195    196      3   30.33400    0.00000  -30.33400    0.00000    0.00000    0.00000 ;    C97-   C98-   C99-  C100
   193    195    196    197      3    8.36800    0.00000   -8.36800    0.00000    0.00000    0.00000 ;    C98-   C99-  C100-   O31
   193    195    196    198      3    8.36800    0.00000   -8.36800    0.00000    0.00000    0.00000 ;    C98-   C99-  C100-   O32
   194    193    195    196      3   30.33400    0.00000  -30.33400    0.00000    0.00000    0.00000 ;    H66-   C98-   C99-  C100

[ dihedrals ] ; impropers
; treated as propers in GROMACS to use correct AMBER analytical function
;    i      j      k      l   func   phase     kd      pn
     5      1      2      3      1   180.00   4.60240   2 ;     C2-    O1-    C1-    O2
    11     17     16     72      1   180.00   4.60240   2 ;     C4-    C8-    C7-   C33
    13     62     14     15      1   180.00   4.60240   2 ;     C5-   C28-    C6-    H7
    13     65     67     68      1   180.00   4.60240   2 ;     C5-   C30-   C31-   O10
    14     67     13     11      1   180.00   4.60240   2 ;     C6-   C31-    C5-    C4
    16     19     17     18      1   180.00   4.60240   2 ;     C7-    C9-    C8-    H8
    16     73     72     71      1   180.00   4.60240   2 ;     C7-   C34-   C33-   O11
    19     73     75     76      1   180.00   4.60240   2 ;     C9-   C34-   C35-   O12
    20     17     19     75      1   180.00   4.60240   2 ;    C10-    C8-    C9-   C35
    20     32     31     80      1   180.00   4.60240   2 ;    C10-   C15-   C14-   C37
    22     24     23     25      1   180.00   4.60240   2 ;    C12-    O3-   C13-    O4
    31     34     32     33      1   180.00   4.60240   2 ;    C14-   C16-   C15-   H14
    31     81     80     79      1   180.00   4.60240   2 ;    C14-   C38-   C37-   O13
    34     81     83     84      1   180.00   4.60240   2 ;    C16-   C38-   C39-   O14
    35     32     34     83      1   180.00   4.60240   2 ;    C17-   C15-   C16-   C39
    35     48     47     88      1   180.00   4.60240   2 ;    C17-   C22-   C21-   C41
    39     43     42     44      1   180.00   4.60240   2 ;    C19-    O5-   C20-    O6
    47     50     48     49      1   180.00   4.60240   2 ;    C21-   C23-   C22-   H21
    47     89     88     87      1   180.00   4.60240   2 ;    C21-   C42-   C41-   O15
    50     89     91     92      1   180.00   4.60240   2 ;    C23-   C42-   C43-   O16
    51     14     62     63      1   180.00   4.60240   2 ;    C24-    C6-   C28-   C29
    51     48     50     91      1   180.00   4.60240   2 ;    C24-   C22-   C23-   C43
    55     59     58     60      1   180.00   4.60240   2 ;    C26-    O7-   C27-    O8
    62     65     63     64      1   180.00   4.60240   2 ;    C28-   C30-   C29-    O9
    63     67     65     66      1   180.00   4.60240   2 ;    C29-   C31-   C30-   H27
    69    177    179    180      1   180.00   4.60240   2 ;    C32-   C89-   C90-   C91
    72     75     73     74      1   180.00   4.60240   2 ;    C33-   C35-   C34-   H29
    77    151    153    154      1   180.00   4.60240   2 ;    C36-   C75-   C76-   C77
    80     83     81     82      1   180.00   4.60240   2 ;    C37-   C39-   C38-   H31
    85    125    127    128      1   180.00   4.60240   2 ;    C40-   C61-   C62-   C63
    88     91     89     90      1   180.00   4.60240   2 ;    C41-   C43-   C42-   H33
    93     96     95     98      1   180.00   4.60240   2 ;    C44-   C46-   C45-   C47
    95    100     98     99      1   180.00   4.60240   2 ;    C45-   C48-   C47-   H36
    95    104     96     97      1   180.00   4.60240   2 ;    C45-   C50-   C46-   H35
    96    102    104    105      1   180.00   4.60240   2 ;    C46-   C49-   C50-   O18
    98    102    100    101      1   180.00   4.60240   2 ;    C47-   C49-   C48-   O17
   100    104    102    103      1   180.00   4.60240   2 ;    C48-   C50-   C49-   H37
   106    108    107    114      1   180.00   4.60240   2 ;    C51-   C53-   C52-   H39
   107    115    106    105      1   180.00   4.60240   2 ;    C52-   C56-   C51-   O18
   108    112    111    113      1   180.00   4.60240   2 ;    C53-   O19-   C55-   O20
   108    120    109    110      1   180.00   4.60240   2 ;    C53-   C58-   C54-   H38
   109    115    120    121      1   180.00   4.60240   2 ;    C54-   C56-   C58-   O21
   111    107    108    109      1   180.00   4.60240   2 ;    C55-   C52-   C53-   C54
   116    106    115    120      1   180.00   4.60240   2 ;    C57-   C51-   C56-   C58
   122    127    125    126      1   180.00   4.60240   2 ;    C59-   C62-   C61-   H44
   122    130    123    124      1   180.00   4.60240   2 ;    C59-   C64-   C60-   H43
   123    125    122    121      1   180.00   4.60240   2 ;    C60-   C61-   C59-   O21
   123    128    130    131      1   180.00   4.60240   2 ;    C60-   C63-   C64-   O22
   127    130    128    129      1   180.00   4.60240   2 ;    C62-   C64-   C63-   H45
   132    134    133    140      1   180.00   4.60240   2 ;    C65-   C67-   C66-   H47
   133    141    132    131      1   180.00   4.60240   2 ;    C66-   C70-   C65-   O22
   134    138    137    139      1   180.00   4.60240   2 ;    C67-   O23-   C69-   O24
   134    146    135    136      1   180.00   4.60240   2 ;    C67-   C72-   C68-   H46
   135    141    146    147      1   180.00   4.60240   2 ;    C68-   C70-   C72-   O25
   137    133    134    135      1   180.00   4.60240   2 ;    C69-   C66-   C67-   C68
   142    132    141    146      1   180.00   4.60240   2 ;    C71-   C65-   C70-   C72
   148    153    151    152      1   180.00   4.60240   2 ;    C73-   C76-   C75-   H52
   148    156    149    150      1   180.00   4.60240   2 ;    C73-   C78-   C74-   H51
   149    151    148    147      1   180.00   4.60240   2 ;    C74-   C75-   C73-   O25
   149    154    156    157      1   180.00   4.60240   2 ;    C74-   C77-   C78-   O26
   153    156    154    155      1   180.00   4.60240   2 ;    C76-   C78-   C77-   H53
   158    160    159    166      1   180.00   4.60240   2 ;    C79-   C81-   C80-   H55
   159    167    158    157      1   180.00   4.60240   2 ;    C80-   C84-   C79-   O26
   160    164    163    165      1   180.00   4.60240   2 ;    C81-   O27-   C83-   O28
   160    172    161    162      1   180.00   4.60240   2 ;    C81-   C86-   C82-   H54
   161    167    172    173      1   180.00   4.60240   2 ;    C82-   C84-   C86-   O29
   163    159    160    161      1   180.00   4.60240   2 ;    C83-   C80-   C81-   C82
   168    158    167    172      1   180.00   4.60240   2 ;    C85-   C79-   C84-   C86
   174    179    177    178      1   180.00   4.60240   2 ;    C87-   C90-   C89-   H60
   174    182    175    176      1   180.00   4.60240   2 ;    C87-   C92-   C88-   H59
   175    177    174    173      1   180.00   4.60240   2 ;    C88-   C89-   C87-   O29
   175    180    182    183      1   180.00   4.60240   2 ;    C88-   C91-   C92-   O30
   179    182    180    181      1   180.00   4.60240   2 ;    C90-   C92-   C91-   H61
   184    195    185    186      1   180.00   4.60240   2 ;    C93-   C99-   C94-   H62
   185    187    184    183      1   180.00   4.60240   2 ;    C94-   C95-   C93-   O30
   187    193    192    101      1   180.00   4.60240   2 ;    C95-   C98-   C97-   O17
   188    184    187    192      1   180.00   4.60240   2 ;    C96-   C93-   C95-   C97
   192    195    193    194      1   180.00   4.60240   2 ;    C97-   C99-   C98-   H66
   195    197    196    198      1   180.00   4.60240   2 ;    C99-   O31-  C100-   O32
   196    185    195    193      1   180.00   4.60240   2 ;   C100-   C94-   C99-   C98
